# Supplementary material for: Antipsychotic Use in Bipolar Disorder: Clinical and Genomic Correlates– A Mayo Clinic Bipolar Disorder Biobank Study
Source: Research Square preprint supplement (doi:10.21203/rs.3.rs-7274612/v1), 2025-08-05
Supplement: Supplementary file 1 [file 107b56c34f477c4f566b14c9.xlsx]

## Sheet: Content
Supplementary Tables: Antipsychotic Use in Bipolar Disorder: Clinical and Genomic Correlates– A Mayo Clinic Bipolar Disorder Biobank Study
Supplementary Table 1	Comparison of demographic and clinical variables between BD patients who were current using one SGA and those who were currently using more than one SGA.
Supplementary Table 2	Comparison of demographic and clinical variables between participants with BD currently on SGA versus and those on FGA.
Supplementary Table 3	Top SNPs of SGA treatment respose GWAS.
Supplementary Table 4	Associations between SGA treatment response and PGSs of various neuropsychiatric illnesses.

## Sheet: Suppl Table 1
Supplementary Table S1. Comparison of demographic and clinical variables between BD patients who were current using one SGA and those who were currently using more than one SGA.
	Total (N = 1045)	Currently More Than One SGA (N = 78)	Currently One SGA (N = 967)	p-value
BD type, n	1044	78	966	0.324
Bipolar I, n (%)	698 (67%)	53 (68%)	645 (67%)
Bipolar II, n (%)	319 (31%)	25 (32%)	294 (30%)
Schizoaffective, n (%)	27 (3%)	0 (0%)	27 (3%)
Rapid cycling, n	972	70	902	0.459
Yes, n (%)	542 (56%)	42 (60%)	500 (55%)
Age of BD diagnosis, n	981	75	906	0.24
≤ 19 years old, n (%)	357 (36%)	32 (43%)	325 (36%)
Age at enrollment, n	1045	78	967	0.085
Mean (SD)	41.15 (14.71)	38.40 (13.24)	41.38 (14.80)
Female, n (%)	663 (63%)	48 (62%)	967	0.716
Race, n	1040	78	962	0.779
White, n (%)	873 (84%)	68 (87%)	805 (84%)
Black, n (%)	31 (3%)	2 (3%)	29 (3%)
Asian, n (%)	8 (1%)	0 (0%)	8 (1%)
Other, n (%)	128 (12%)	8 (10%)	120 (12%)
Hispanic, n	1015	76	939	0.879
Yes, n (%)	141 (14%)	11 (14%)	130 (14%)
Body mass index, n	988	72	916	0.588
Mean (SD)	30.42 (7.60)	30.88 (7.58)	30.38 (7.60)
Currently married, n	1008	76	932	0.059
Yes, n (%)	422 (42%)	24 (32%)	398 (43%)
Current full-time employment, n	989	76	913	0.222
Yes, n (%)	225 (23%)	13 (17%)	212 (23%)
Highest education level, n	983	75	908	0.905
High school or less, n (%)	33 (3%)	3 (4%)	30 (3%)
High school graduated, n (%)	144 (15%)	10 (13%)	134 (15%)
Beyond high school graduation, n (%)	806 (82%)	62 (83%)	744 (82%)
BD Medication Response
Lithium: Alda A score, n	319	31	288	0.635
Mean (SD)	5.19 (2.76)	4.97 (2.73)	5.22 (2.76)
FGA: Alda A score, n	26	1	25	0.149
Mean (SD)	3.23 (2.64)	7.00 (NA)	3.08 (2.58)
SGA: Alda A score, n	345	20	325	0.55
Mean (SD)	5.77 (2.30)	6.07 (2.29)	5.75 (2.31)
All antipsychotics: Alda A score, n	697	58	639	0.491
Mean (SD)	5.66 (2.32)	6.01 (2.19)	5.64 (2.33)
Mood-stabilizing anticonvulsants: Alda A score, n	737	56	681	0.613
Mean (SD)	5.12 (2.59)	5.39 (2.38)	5.10 (2.60)
Antidepressants: Alda A score, n	233	15	218	0.131
Mean (SD)	3.77 (2.49)	2.83 (2.87)	3.84 (2.46)
Current Use of Other BD Medications
Current lithium, n (%)	308 (29%)	29 (37%)	279 (29%)	0.121
Current mood stabilizing anticonvulsants, n (%)	595 (57%)	39 (50%)	556 (57%)	0.198
Current antidepressants, n (%)	469 (45%)	38 (49%)	431 (45%)	0.479
Family History (First-degree Relative)
Have relatives with BD, n	780	64	716	0.908
Yes, n (%)	371 (48%)	30 (47%)	341 (48%)
Have relatives with schizophrenia, n	813	67	746	0.8
Yes, n (%)	80 (10%)	6 (9%)	74 (10%)
Lifetime Psychiatric Illness History
Adult ADHD, n	1010	77	933	0.913
Yes, n (%)	205 (20%)	16 (21%)	189 (20%)
Child ADHD, n	1006	76	930	0.244
Yes, n (%)	164 (16%)	16 (21%)	148 (16%)
Post-traumatic stress disorder, n	1012	77	935	0.381
Yes, n (%)	280 (28%)	18 (23%)	262 (28%)
General anxiety disorder, n	1017	76	941	0.59
Yes, n (%)	512 (50%)	36 (47%)	476 (51%)
Social anxiety disorder, n	1010	76	934	0.847
Yes, n (%)	235 (23%)	17 (22%)	218 (23%)
Obsessive compulsive disorder, n	1017	77	940	0.849
Yes, n (%)	138 (14%)	11 (14%)	127 (14%)
Phobia, n	681	48	633	0.286
Yes, n (%)	74 (11%)	3 (6%)	71 (11%)
Panic, n	1015	77	938	0.131
Yes, n (%)	315 (31%)	18 (23%)	297 (32%)
Anorexia, n	1019	77	942	0.067
Yes, n (%)	68 (7%)	9 (12%)	59 (6%)
Bulimia, n	1018	75	943	0.04
Yes, n (%)	75 (7%)	10 (13%)	65 (7%)
Binge eating, n	1019	77	942	0.625
Yes, n (%)	140 (14%)	12 (16%)	128 (14%)
Manic psychosis, n	1035	77	958	0.66
Yes, n (%)	305 (29%)	21 (27%)	284 (30%)
Suicide Attempt History
Suicide attempt (ever), n	1039	76	963	0.021
Yes, n (%)	391 (38%)	38 (50%)	353 (37%)
Lifetime Substance Use Disorder History
Nicotine use disorder, n	1019	77	942	0.088
Yes, n (%)	435 (43%)	40 (52%)	395 (42%)
Alcohol use disorder, n	1022	76	946	0.824
Yes, n (%)	418 (41%)	32 (42%)	386 (41%)
Cocaine use disorder, n	1012	76	936	0.776
Yes, n (%)	158 (16%)	11 (14%)	147 (16%)
Marijuana use disorder, n	1018	77	941	0.511
Yes, n (%)	325 (32%)	22 (29%)	303 (32%)
Methamphetamine use disorder, n	1016	77	939	0.685
Yes, n (%)	105 (10%)	9 (12%)	96 (10%)
Opioid use disorder, n	1010	77	933	0.166
Yes, n (%)	130 (13%)	6 (8%)	124 (13%)
Benzodiazepine use disorder, n	669	49	620	0.207
Yes, n (%)	73 (11%)	8 (16%)	65 (10%)
Medical Comorbidity
Modified CIRS, n	706	48	658	0.495
Medical comorbidity severity*, mean (SD)	6.26 (6.51)	6.74 (6.56)	6.22 (6.51)
Cardiac, n (%)	93 (13%)	7 (15%)	86 (13%)	0.765
Hypertension, n (%)	192 (27%)	19 (40%)	173 (26%)	0.046
Vascular, n (%)	78 (11%)	6 (12%)	72 (11%)	0.74
Respiratory, n (%)	177 (25%)	12 (25%)	165 (25%)	0.991
Eyes, ears, nose, throat, larynx, n (%)	191 (27%)	14 (29%)	177 (27%)	0.733
Upper gastrointestinal, n (%)	180 (25%)	18 (38%)	162 (25%)	0.048
Lower gastrointestinal, n (%)	144 (20%)	7 (15%)	137 (21%)	0.301
Hepatic, n (%)	37 (5%)	2 (4%)	35 (5%)	0.729
Renal, n (%)	66 (9%)	5 (10%)	61 (9%)	0.792
Other genitourinary, n (%)	140 (20%)	11 (23%)	129 (20%)	0.579
Musculoskeletal, integumentary, n (%)	251 (36%)	21 (44%)	230 (35%)	0.219
Neurological, n (%)	271 (38%)	16 (33%)	255 (39%)	0.456
Endocrine-metabolic, n (%)	225 (32%)	21 (44%)	204 (31%)	0.067
EDDS score, n	165	9	156	0.603
Mean (SD)	-0.03 (0.54)	0.01 (0.53)	-0.03 (0.54)
Tardive dyskinesia, n	364	33	331	0.21
Yes, n (%)	42 (12%)	6 (18%)	36 (11%)
*The mean of the scores of the first 13 categories (excluding psychiatric) in the Modified Cumulative Illness Ration Scale (CIRS). ADHD: attention-deficit/hyperactivity disorder; BD: bipolar disorder; CIRS: Cumulative Illness Ration Scale; EDDS: eating disorder diagnostic scale; FGA: first-generation antipsychotics; SGA: second-generation antipsychotics Bold p-value: < 0.001

## Sheet: Suppl Table 2
Supplementary Table S2. Comparison of demographic and clinical variables between participants with BD currently on SGA versus and those on FGA.
	Total (N = 1051)	Current FGA (N = 16)	Current SGA (N = 1035)	p-value
BD type, n	1050	16	1034	0.465
Bipolar I, n (%)	698 (66%)	9 (56%)	689 (67%)
Bipolar II, n (%)	325 (31%)	7 (44%)	318 (31%)
Schizoaffective, n (%)	27 (3%)	0 (0%)	27 (3%)
Rapid cycling, n	977	14	963	0.519
Yes, n (%)	545 (56%)	9 (64%)	536 (56%)
Age of BD diagnosis, n	988	16	972	0.929
≤ 19 years old, n (%)	360 (36%)	6 (38%)	354 (36%)
Age at enrollment, n	1051	16	1035	0.566
Mean (SD)	41.2 (14.6)	43.2 (12.0)	41.1 (14.7)
Sex, n	1051	16	1035	0.046
Female, n (%)	670 (64%)	14 (88%)	656 (63%)
Race, n	1046	16	1030	0.734
White, n (%)	878 (84%)	15 (94%)	863 (84%)
Black, n (%)	31 (3%)	0 (0%)	31 (3%)
Asian, n (%)	8 (1%)	0 (0%)	8 (1%)
Other, n (%)	129 (12%)	1 (6%)	128 (12%)
Hispanic, n	1020	15	1005	0.418
Yes, n (%)	141 (14%)	1 (7%)	140 (14%)
Body mass index, n	994	16	978	0.165
Mean (SD)	30.3 (7.6)	27.7 (5.8)	30.4 (7.6)
Currently married, n	1013	15	998	0.871
Yes, n (%)	426 (42%)	6 (40%)	420 (42%)
Current full-time employment, n	994	15	979	0.135
Yes, n (%)	226 (23%)	1 (7%)	225 (23%)
Highest education level, n	989	15	974	0.766
High school or less, n (%)	33 (3%)	1 (7%)	32 (3%)
High school graduated, n (%)	145 (15%)	2 (13%)	143 (15%)
Beyond high school graduation, n (%)	811 (82%)	12 (80%)	799 (82%)
BD Medication Response
Lithium: Alda A score, n	322	8	314	0.275
Mean (SD)	5.2 (2.8)	6.2 (2.1)	5.2 (2.8)
FGA: Alda A score, n	25	3	22	0.077
Mean (SD)	3.2 (2.6)	5.7 (2.3)	2.8 (2.5)
SGA: Alda A score, n	342	2	340	0.002
Mean (SD)	5.8 (2.3)	0.8 (1.1)	5.8 (2.3)
All antipsychotics: Alda A score, n	347	4	343	0.017
Mean (SD)	5.6 (2.3)	2.9 (3.0)	5.7 (2.3)
Mood-stabilizing anticonvulsants: Alda A score, n	307	3	304	0.561
Mean (SD)	5.1 (2.6)	6.0 (2.0)	5.1 (2.6)
Antidepressants: Alda A score, n	233	4	229	0.717
Mean (SD)	3.8 (2.5)	4.2 (3.0)	3.8 (2.5)
Current Use of Other BD Medications
Current lithium, n (%)	311 (30%)	7 (44%)	304 (29%)	0.211
Current MSACs, n (%)	595 (57%)	8 (50%)	587 (57%)	0.591
Current antidepressants, n (%)	475 (45%)	10 (62%)	465 (45%)	0.161
Family History (First-degree Relative)
BD, n	784	11	773	0.291
Yes, n (%)	375 (48%)	7 (64%)	368 (48%)
Schizophrenia, n	816	10	806	0.983
Yes, n (%)	80 (10%)	1 (10%)	79 (10%)
Lifetime Psychiatric Illness History
Adult ADHD, n	1016	16	1000	0.441
Yes, n (%)	205 (20%)	2 (12%)	203 (20%)
Child ADHD, n	1012	16	996	0.283
Yes, n (%)	162 (16%)	1 (6%)	161 (16%)
Post-traumatic stress disorder, n	1018	16	1002	0.742
Yes, n (%)	281 (28%)	5 (31%)	276 (28%)
General anxiety disorder, n	1023	16	1007	0.304
Yes, n (%)	514 (50%)	6 (38%)	508 (50%)
Social anxiety disorder, n	1016	16	1000	0.675
Yes, n (%)	235 (23%)	3 (19%)	232 (23%)
Obsessive compulsive disorder, n	1022	15	1007	0.466
Yes, n (%)	139 (14%)	3 (20%)	136 (14%)
Phobia, n	685	11	674	0.842
Yes, n (%)	75 (11%)	1 (9%)	74 (11%)
Panic, n	1021	16	1005	0.105
Yes, n (%)	320 (31%)	8 (50%)	312 (31%)
Anorexia, n	1025	16	1009	0.938
Yes, n (%)	69 (7%)	1 (6%)	68 (7%)
Bulimia, n	1024	16	1008	0.857
Yes, n (%)	76 (7%)	1 (6%)	75 (7%)
Binge eating, n	1025	16	1009	0.384
Yes, n (%)	140 (14%)	1 (6%)	139 (14%)
Manic psychosis, n	1041	16	1025	0.468
Yes, n (%)	305 (29%)	6 (38%)	299 (29%)
Suicide Attempt History
Suicide attempt (ever), n	1045	16	1029	0.043
Yes, n (%)	398 (38%)	10 (62%)	388 (38%)
Lifetime Substance Use Disorder History
Nicotine use disorder, n	1025	16	1009	0.111
Yes, n (%)	440 (43%)	10 (62%)	430 (43%)
Alcohol use disorder, n	1027	15	1012	0.653
Yes, n (%)	421 (41%)	7 (47%)	414 (41%)
Cocaine use disorder, n	1018	16	1002	0.737
Yes, n (%)	158 (16%)	2 (12%)	156 (16%)
Marijuana use disorder, n	1024	16	1008	0.953
Yes, n (%)	327 (32%)	5 (31%)	322 (32%)
Methamphetamine use disorder, n	1022	16	1006	0.778
Yes, n (%)	106 (10%)	2 (12%)	104 (10%)
Opioid use disorder, n	1016	16	1000	0.481
Yes, n (%)	131 (13%)	3 (19%)	128 (13%)
Benzodiazepine use disorder, n	674	10	664	0.932
Yes, n (%)	73 (11%)	1 (10%)	72 (11%)
Medical Comorbidity
Modified CIRS, n	710	11	699	0.341
Medical comorbidity severity*, mean (SD)	6.2 (6.6)	7.8 (10.6)	6.2 (6.5)
Cardiac, n (%)	93 (13%)	1 (9%)	92 (13%)
Hypertension, n (%)	195 (27%)	5 (45%)	190 (27%)
Vascular, n (%)	78 (11%)	1 (9%)	77 (11%)
Respiratory, n (%)	178 (25%)	4 (36%)	174 (25%)
Eyes, ears, nose, throat, larynx, n (%)	191 (27%)	1 (9%)	190 (27%)
Upper gastrointestinal, n (%)	180 (25%)	4 (36%)	176 (25%)
Lower gastrointestinal, n (%)	145 (20%)	2 (18%)	143 (20%)
Hepatic, n (%)	38 (5%)	2 (18%)	36 (5%)
Renal, n (%)	67 (9%)	2 (18%)	65 (9%)
Other genitourinary, n (%)	139 (20%)	3 (27%)	136 (19%)
Musculoskeletal, integumentary, n (%)	251 (35%)	3 (27%)	248 (35%)
Neurological, n (%)	272 (38%)	6 (55%)	266 (38%)
Endocrine-metabolic, n (%)	224 (32%)	3 (27%)	221 (32%)
Tardive dyskinesia, n	367	7	360	0.162
Yes, n (%)	43 (12%)	2 (29%)	41 (11%)
*The mean of the scores of the first 13 categories (excluding psychiatric) in the Modified Cumulative Illness Ration Scale (CIRS). ADHD: attention-deficit/hyperactivity disorder; BD: bipolar disorder; CIRS: Cumulative Illness Ration Scale; FGA: first-generation antipsychotics; SGA: second-generation antipsychotics Bold p-value: < 0.001

## Sheet: Suppl Table 3
Supplementary Table S3. Top SNPs of SGA treatment respose GWAS.
uniqID	rsID	chr	pos	non_effect_allele	effect_allele	MAF	gwasP	beta	se	r2	IndSigSNP	GenomicLocus	nearestGene	dist	func	CADD	RDB	minChrState	commonChrState	posMapFilt	eqtlMapFilt	ciMapFilt
17:10062867:C:CA	rs202127418	17	10062867	C	CA	0.0220328	4.96e-08	-3.01621	0.544883			20	GAS7	0	intronic
17:10050390:C:T	rs12935988	17	10050390	T	C	0.07049	1.04228e-07	-1.31958	0.24453	1	rs12935988	20	GAS7	0	intronic	0.825	7	5	15	1	0	1
17:10045520:C:G	rs7219136	17	10045520	G	C	0.09026	7.00529e-07	-1.15858	0.230607	0.372942	rs12935988	20	GAS7	0	intronic	0.875	5	5	15	1	0	1
17:10047612:A:G	rs10491090	17	10047612	G	A	0.09565	8.78586e-07	-1.09108	0.219169	0.398491	rs12935988	20	GAS7	0	intronic	14.42	NA	5	15	1	0	1
1:160348960:A:G	rs77847479	1	160348960	G	A	0.07009	8.98256e-07	-1.29746	0.260861	1	rs77847479	2	NHLH1	6321	intergenic	7.796	5	5	15	1	0	1
13:54846376:G:T	rs11619037	13	54846376	G	T	0.06969	9.21209e-07	-1.63218	0.328496	1	rs11619037	18	LINC00458	139374	intergenic	0.8	7	1	15	0	0	1
17:10008866:C:G	rs916582	17	10008866	C	G	0.05072	1.01228e-06	-1.70344	0.344169	1	rs916582	20	GAS7	0	intronic	6.896	6	5	15	1	0	0
17:10028767:A:G	rs116960855	17	10028767	G	A	0.01398	1.11005e-06	-1.95525	0.396554	0.104781	rs916582	20	GAS7	0	intronic	10.7	3a	5	5	1	0	0
13:54849970:A:G	rs11620001	13	54849970	G	A	0.07528	1.18599e-06	-1.60254	0.325916	0.915087	rs11619037	18	LINC00458	142968	intergenic	1.779	7	1	15	0	0	1
1:173272713:C:G	rs72724954	1	173272713	G	C	0.06909	1.2257e-06	-1.33363	0.271599	1	rs72724954	3	snoU13	22403	intergenic	1.045	4	2	15	1	0	1
7:108076616:A:G	rs141901173	7	108076616	A	G	0.02017	1.84711e-06	-3.08913	0.640175	1	rs141901173	11	NRCAM	0	intronic	4.381	7	1	15	1	1	1
7:108078895:A:T	rs143461822	7	108078895	T	A	0.01677	1.86822e-06	-3.08792	0.640238	0.835991	rs141901173	11	NRCAM	0	intronic	6.408	6	5	15	1	1	1
14:50855330:A:T	rs12896268	14	50855330	A	T	0.4555	2.23563e-06	-0.774413	0.161824	1	rs12896268	19	CDKL1	0	intronic	0.743	4	2	15	1	1	1
12:41342865:T:TA	rs147468045	12	41342865	TA	T	0.05571	2.35739e-06	-3.07783	0.644655	1	rs147468045	16	CNTN1	0	intronic	1.45	NA	5	15	1	0	1
4:67156303:C:T	rs67668930	4	67156303	C	T	0.07728	2.38302e-06	-1.95821	0.410344	1	rs67668930	7	MIR1269A	13656	intergenic	2.275	7	9	15	1	0	1
4:67155765:A:G	rs61224431	4	67155765	A	G	0.07728	2.38769e-06	-1.95911	0.410567	1	rs67668930	7	MIR1269A	13118	intergenic	0.043	7	9	15	1	0	1
1:160344775:A:G	rs74123185	1	160344775	G	A	0.08466	2.60314e-06	-1.22832	0.258404	0.713567	rs77847479	2	NHLH1	2136	intergenic	7.425	2b	1	7	1	1	1
23:81564681:A:G	rs73241354	23	81564681	G	A	0.1048	2.78439e-06	0.794643	0.167672	1	rs73241354	22	RP4-581F12.1	188436	intergenic	1.636	7	9	15	0	0	1
1:160212700:C:T	rs11265362	1	160212700	C	T	0.07268	2.98455e-06	-1.35199	0.286161	0.366752	rs77847479	2	DCAF8:DCAF8	00:00:00	intronic	2.131	6	2	4	1	0	1
7:9417950:A:G	rs77755643	7	9417950	A	G	0.02236	3.23997e-06	-1.74968	0.371709	1	rs77755643	10	AC079756.1	216296	intergenic	2.133	6	9	15	0	0	1
4:67155265:C:G	rs13101728	4	67155265	C	G	0.07548	3.8196e-06	-1.92609	0.412263	0.975971	rs67668930	7	MIR1269A	12618	intergenic	0.488	5	9	15	1	0	1
7:9392176:C:G	rs56172562	7	9392176	G	C	0.02256	3.95088e-06	-1.72951	0.370762	0.813768	rs77755643	10	AC079756.1	242070	intergenic	1.48	6	7	15	0	0	1
7:9392267:A:G	rs56392330	7	9392267	G	A	0.02256	3.95088e-06	-1.72951	0.370762	0.800194	rs77755643	10	AC079756.1	241979	intergenic	1.968	7	7	15	0	0	1
7:9392421:C:T	rs55776823	7	9392421	C	T	0.02236	3.95088e-06	-1.72951	0.370762	0.805376	rs77755643	10	AC079756.1	241825	intergenic	11.82	6	7	15	0	0	1
7:9395084:A:G	rs374815175	7	9395084	G	A	0.02177	4.1663e-06	-1.72581	0.370875	0.825563	rs77755643	10	AC079756.1	239162	intergenic	1.587	6	5	15	0	0	1
4:67220814:G:GT	rs5859031	4	67220814	GT	G	0.1154	4.24061e-06	-1.79361	0.385761	0.227978	rs67668930	7	RPS23P3	75995	intergenic	1.408	NA	15	15	0	0	1
7:9393968:C:T	rs142169607	7	9393968	C	T	0.02097	4.24765e-06	-1.72414	0.370846	0.873376	rs77755643	10	AC079756.1	240278	intergenic	0.766	6	5	15	0	0	1
2:118951886:A:G	rs2422177	2	118951886	A	G	0.1815	4.40175e-06	-1.3605	0.293115	1	rs2422177	4	AC093901.1	7923	intergenic	2.28	NA	14	14	1	0	1
4:67232011:C:T	rs1033095	4	67232011	C	T	0.1488	4.80489e-06	-1.60163	0.346476	0.252045	rs67668930	7	RPS23P3	64798	intergenic	3.095	NA	9	15	0	0	1
7:9395220:C:G	rs567553437	7	9395220	G	C	0.02177	4.90006e-06	-1.73212	0.37505	0.84257	rs77755643	10	AC079756.1	239026	intergenic	0.88	NA	5	15	0	0	1
7:9393032:A:C	rs117789908	7	9393032	C	A	0.01977	5.00166e-06	-1.74101	0.377336	0.727494	rs77755643	10	AC079756.1	241214	intergenic	0.586	6	7	15	0	0	1
7:9390908:A:G	rs76340909	7	9390908	A	G	0.02236	5.39411e-06	-1.71355	0.372707	0.820791	rs77755643	10	AC079756.1	243338	intergenic	3.849	6	5	15	0	0	1
17:10055216:C:T	rs79666361	17	10055216	C	T	0.07907	5.47136e-06	-1.19518	0.260135	0.417581	rs12935988	20	GAS7	0	intronic	5.762	7	2	15	1	0	1
4:67129376:G:T	rs35827885	4	67129376	G	T	0.07169	5.49495e-06	-1.86852	0.40677	0.716635	rs67668930	7	MIR1269A	13165	intergenic	0.236	7	9	15	1	0	1
1:160296276:A:G	rs10908773	1	160296276	G	A	0.07228	5.62859e-06	-1.28569	0.280208	0.375924	rs77847479	2	COPA	0	intronic	0.72	3a	4	4	1	1	1
6:110755923:C:T	rs221720	6	110755923	C	T	0.0595	5.74686e-06	-1.69735	0.370292	1	rs221720	9	SLC22A16	0	intronic	0.097	NA	4	15	1	1	1
7:9394944:A:G	rs186203301	7	9394944	G	A	0.02596	6.24793e-06	-1.67979	0.367925	0.715493	rs77755643	10	AC079756.1	239302	intergenic	2.108	6	5	15	0	0	1
1:160337571:A:G	rs12025341	1	160337571	G	A	0.08466	6.26203e-06	-1.17912	0.25829	0.705162	rs77847479	2	NHLH1	0	intronic	6.514	4	1	15	1	0	1
8:69947175:C:T	rs2912504	8	69947175	T	C	0.2722	6.31964e-06	-0.814115	0.178413	1	rs2912504	13	RP11-600K15.1	0	ncRNA_intronic	5.459	7	5	15	1	0	1
1:160332081:A:T	rs17370655	1	160332081	A	T	0.08087	6.37002e-06	-1.17845	0.258355	0.686865	rs77847479	2	NCSTN	3338	intergenic	14.52	2b	4	5	1	1	1
7:9423574:C:T	rs80232190	7	9423574	T	C	0.02157	6.88271e-06	-1.67757	0.36915	0.866165	rs77755643	10	AC079756.1	210672	intergenic	3.771	7	9	15	0	0	1
4:67352292:C:T	rs17787189	4	67352292	T	C	0.01737	6.90756e-06	-1.98364	0.436578	0.126925	rs67668930	7	RPS23P3	55052	intergenic	5.138	6	14	15	0	0	1
4:67226901:C:T	rs2350805	4	67226901	C	T	0.2001	7.02764e-06	-1.61721	0.356226	0.324614	rs67668930	7	RPS23P3	69908	intergenic	1.299	7	7	15	0	0	1
4:67226013:A:AG	rs141350431	4	67226013	A	AG	0.1999	7.03139e-06	-1.61693	0.356174	0.325515	rs67668930	7	RPS23P3	70796	intergenic	5.574	NA	5	15	0	0	1
4:67227807:C:G	rs6812107	4	67227807	G	C	0.2001	7.03139e-06	-1.61693	0.356174	0.324614	rs67668930	7	RPS23P3	69002	intergenic	1.209	7	15	15	0	0	1
7:9424112:A:G	rs74714885	7	9424112	G	A	0.02756	7.10107e-06	-1.67775	0.369748	0.816813	rs77755643	10	AC079756.1	210134	intergenic	11.64	7	9	15	0	0	1
7:9424922:A:G	rs79155721	7	9424922	G	A	0.02756	7.10302e-06	-1.67417	0.368964	0.816813	rs77755643	10	AC079756.1	209324	intergenic	3.694	6	9	15	0	0	1
7:9424776:C:T	rs116362600	7	9424776	T	C	0.02756	7.10552e-06	-1.67395	0.36892	0.816813	rs77755643	10	AC079756.1	209470	intergenic	3.818	6	9	15	0	0	1
7:9425963:C:T	rs78059222	7	9425963	T	C	0.02516	7.1119e-06	-1.67407	0.368963	0.892655	rs77755643	10	AC079756.1	208283	intergenic	3.205	6	9	15	0	0	1
7:9425977:C:T	rs75795524	7	9425977	C	T	0.02756	7.1119e-06	-1.67407	0.368963	0.816813	rs77755643	10	AC079756.1	208269	intergenic	0.572	7	9	15	0	0	1
7:9422444:C:T	rs117569320	7	9422444	C	T	0.02196	7.11263e-06	-1.67437	0.369031	0.85101	rs77755643	10	AC079756.1	211802	intergenic	6.975	6	9	15	0	0	1
7:9429753:G:T	rs77782976	7	9429753	G	T	0.02356	7.11335e-06	-1.67405	0.368962	0.934891	rs77755643	10	AC079756.1	204493	intergenic	1.252	6	9	15	0	0	1
7:9421162:T:TA	rs147351898	7	9421162	TA	T	0.02157	7.12892e-06	-1.67419	0.369033	0.866165	rs77755643	10	AC079756.1	213084	intergenic	0.87	NA	9	15	0	0	1
7:9423170:C:T	rs11980363	7	9423170	C	T	0.02576	7.13222e-06	-1.67413	0.369027	0.728797	rs77755643	10	AC079756.1	211076	intergenic	1.531	7	9	15	0	0	1
7:9423385:C:T	rs79846593	7	9423385	C	T	0.02536	7.13222e-06	-1.67413	0.369027	0.740065	rs77755643	10	AC079756.1	210861	intergenic	0.479	6	9	15	0	0	1
7:9423395:C:T	rs76899895	7	9423395	T	C	0.02196	7.13222e-06	-1.67413	0.369027	0.85101	rs77755643	10	AC079756.1	210851	intergenic	0.815	6	9	15	0	0	1
7:9424235:A:T	rs75757060	7	9424235	A	T	0.02756	7.13222e-06	-1.67413	0.369027	0.816813	rs77755643	10	AC079756.1	210011	intergenic	4.098	7	9	15	0	0	1
7:9419879:A:G	rs79517402	7	9419879	A	G	0.02157	7.14002e-06	-1.67409	0.369039	0.866165	rs77755643	10	AC079756.1	214367	intergenic	2.731	7	9	15	0	0	1
7:9423040:G:T	rs117115475	7	9423040	T	G	0.02157	7.14617e-06	-1.67416	0.369069	0.866165	rs77755643	10	AC079756.1	211206	intergenic	13.32	6	9	15	0	0	1
4:67230803:C:T	rs7676695	4	67230803	C	T	0.1977	7.24575e-06	-1.63026	0.359632	0.320918	rs67668930	7	RPS23P3	66006	intergenic	2.366	6	9	15	0	0	1
3:14380774:C:T	rs13091718	3	14380774	C	T	0.4744	7.30308e-06	0.733031	0.161767	1	rs13091718	5	RP11-536I6.1	9176	intergenic	3.609	5	5	15	1	0	1
7:9429355:A:G	rs139697822	7	9429355	A	G	0.02336	7.38219e-06	-1.6749	0.369814	0.94259	rs77755643	10	AC079756.1	204891	intergenic	2.665	7	9	15	0	0	1
2:118931485:C:G	rs6542431	2	118931485	C	G	0.2111	7.40302e-06	-1.35897	0.300099	0.697499	rs2422177	4	AC093901.1	0	ncRNA_intronic	1.128	5	5	15	1	0	1
7:9414838:C:T	rs75174522	7	9414838	T	C	0.02157	7.57758e-06	-1.67219	0.369686	0.866165	rs77755643	10	AC079756.1	219408	intergenic	0.695	6	9	15	0	0	1
7:9417828:C:CTA	rs150808180	7	9417828	CTA	C	0.02356	7.58662e-06	-1.67195	0.369654	0.951119	rs77755643	10	AC079756.1	216418	intergenic	4.138	NA	9	15	0	0	1
7:9415518:C:T	rs75834753	7	9415518	C	T	0.02157	7.58714e-06	-1.67211	0.369689	0.866165	rs77755643	10	AC079756.1	218728	intergenic	0.214	6	9	15	0	0	1
7:9416463:C:T	rs117458211	7	9416463	T	C	0.02157	7.58714e-06	-1.67211	0.369689	0.866165	rs77755643	10	AC079756.1	217783	intergenic	1.026	6	9	15	0	0	1
7:9418774:C:T	rs118109617	7	9418774	T	C	0.02356	7.58755e-06	-1.67194	0.369654	0.951119	rs77755643	10	AC079756.1	215472	intergenic	6.33	7	9	15	0	0	1
7:9416093:T:TTAAC	rs138725791	7	9416093	TTAAC	T	0.02157	7.59956e-06	-1.67194	0.369681	0.866165	rs77755643	10	AC079756.1	218153	intergenic	2.075	NA	9	15	0	0	1
7:9420257:G:T	rs79534508	7	9420257	G	T	0.02157	7.69861e-06	-1.67055	0.369607	0.866165	rs77755643	10	AC079756.1	213989	intergenic	3.227	7	9	15	0	0	1
4:67274403:A:G	rs72643138	4	67274403	G	A	0.07548	7.81272e-06	-1.93744	0.428964	0.264871	rs67668930	7	RPS23P3	22406	intergenic	6.082	7	15	15	1	0	1
17:10080381:C:T	rs8081398	17	10080381	T	C	0.1236	7.8193e-06	-1.23665	0.273816	1	rs8081398	20	GAS7	0	intronic	0.263	6	4	15	1	0	1
7:9413397:A:G	rs78044505	7	9413397	A	G	0.02236	7.89743e-06	-1.66923	0.369774	1	rs77755643	10	AC079756.1	220849	intergenic	1.665	7	9	15	0	0	1
4:14265869:C:T	rs1968315	4	14265869	T	C	0.1468	8.01019e-06	1.04674	0.232038	1	rs1968315	6	RP11-669M16.1	21431	intergenic	4.067	NA	5	15	1	1	1
4:14270358:C:T	rs12499689	4	14270358	T	C	0.1494	8.0982e-06	1.04614	0.23203	0.97517	rs1968315	6	RP11-669M16.1	25920	intergenic	5.836	6	2	15	1	0	1
4:116046657:A:G	rs59230330	4	116046657	G	A	0.2031	8.10884e-06	-0.96609	0.214289	1	rs59230330	8	NDST4	11624	intergenic	1.396	6	5	15	1	0	1
7:9400683:A:G	rs79181626	7	9400683	G	A	0.02017	8.26954e-06	-1.66713	0.370141	0.906404	rs77755643	10	AC079756.1	233563	intergenic	0.006	6	9	15	0	0	1
7:9401182:C:T	rs11486893	7	9401182	C	T	0.02157	8.29275e-06	-1.66681	0.370122	0.866165	rs77755643	10	AC079756.1	233064	intergenic	7.88	7	9	15	0	0	1
1:54578401:A:G	rs954878	1	54578401	G	A	0.2991	8.29655e-06	-0.707152	0.15703	1	rs954878	1	TCEANC2	208	intergenic	1.241	5	5	15	1	0	1
7:9407281:A:G	rs75149041	7	9407281	G	A	0.02157	8.33e-06	-1.66643	0.37012	0.866165	rs77755643	10	AC079756.1	226965	intergenic	0.79	6	9	15	0	0	1
7:9403361:A:T	rs74867108	7	9403361	A	T	0.02157	8.3333e-06	-1.66641	0.370121	0.866165	rs77755643	10	AC079756.1	230885	intergenic	0.559	6	9	15	0	0	1
7:9397673:A:G	rs138325200	7	9397673	G	A	0.02157	8.37856e-06	-1.66647	0.370233	0.866165	rs77755643	10	AC079756.1	236573	intergenic	0.909	7	1	15	0	0	1
4:67128363:A:G	rs35980427	4	67128363	G	A	0.06929	8.37922e-06	-1.84232	0.409304	0.713302	rs67668930	7	MIR1269A	14178	intergenic	1.323	7	9	15	1	0	1
4:67147908:C:CA	rs34900450	4	67147908	CA	C	0.09085	8.59377e-06	-1.83709	0.408648	0.786233	rs67668930	7	MIR1269A	5261	intergenic	1.486	NA	9	15	1	0	1
4:67343212:A:T	rs58788152	4	67343212	A	T	0.0599	8.67464e-06	-1.88555	0.419621	0.14286	rs67668930	7	RPS23P3	45972	intergenic	0.347	7	9	15	1	0	1
1:160266349:A:G	rs12140856	1	160266349	A	G	0.07089	8.83183e-06	-1.25672	0.279927	0.385723	rs77847479	2	COPA	0	intronic	6.096	5	4	4	1	0	1
2:118948096:C:T	rs6542435	2	118948096	T	C	0.1587	8.97146e-06	-1.31734	0.293656	0.643815	rs2422177	4	AC093901.1	4133	intergenic	2.251	4	5	14	1	0	1
7:9403944:C:T	rs7788973	7	9403944	C	T	0.02157	9.06691e-06	-1.66302	0.370907	0.866165	rs77755643	10	AC079756.1	230302	intergenic	0.038	7	9	15	0	0	1
4:14266575:G:T	rs35793517	4	14266575	T	G	0.1422	9.09782e-06	1.04255	0.232562	0.966247	rs1968315	6	RP11-669M16.1	22137	intergenic	2.124	7	5	15	1	1	1
13:54885863:C:T	rs11620178	13	54885863	C	T	0.1004	9.17382e-06	-1.25998	0.281179	0.430484	rs11619037	18	RPL13AP25	128975	intergenic	0.192	5	4	15	0	0	1
12:78431320:A:AT	rs5799370	12	78431320	AT	A	0.3628	9.21502e-06	-0.730902	0.163145	1	rs5799370	17	NAV3	0	intronic	2.343	NA	1	15	1	0	1
12:41639717:A:G	rs77806609	12	41639717	G	A	0.01637	9.2203e-06	-3.20491	0.715392	0.155247	rs147468045	16	PDZRN4	0	intronic	4.589	7	5	15	1	0	1
8:40819259:G:T	rs72632937	8	40819259	G	T	0.02216	9.25918e-06	2.13378	0.476397	1	rs72632937	12	RP11-465K16.1	59885	intergenic	0.792	7	9	15	0	0	1
1:173270734:A:G	rs61828280	1	173270734	A	G	0.06629	9.37729e-06	-1.23599	0.276126	0.829782	rs72724954	3	snoU13	20424	intergenic	6.882	2b	5	15	1	0	1
12:41323127:A:G	rs189950345	12	41323127	A	G	0.01378	9.58038e-06	-3.08875	0.690774	0.206037	rs147468045	16	CNTN1	0	intronic	0.961	6	5	15	1	0	1
10:133000320:C:T	rs2918132	10	133000320	T	C	0.2202	9.76414e-06	0.764641	0.171168	1	rs2918132	14	TCERG1L	0	intronic	0.075	NA	5	15	1	0	1
7:9394794:C:T	rs188397601	7	9394794	C	T	0.02256	9.7818e-06	-1.64454	0.36817	0.829202	rs77755643	10	AC079756.1	239452	intergenic	1.491	7	5	15	0	0	1
11:117542353:A:G	rs658274	11	117542353	A	G	0.07668	9.94852e-06	1.27217	0.285044	1	rs658274	15	DSCAML1	0	intronic	17.79	5	5	15	1	0	0
19:13694597:A:T	rs7252743	19	13694597	A	T	0.4251	9.9763e-06	-0.761303	0.170603	1	rs7252743	21	CACNA1A	0	intronic	0.106	6	5	15	1	0	1
4:14270181:C:T	rs73111384	4	14270181	T	C	0.1639	1.01727e-05	1.02258	0.229378	0.873777	rs1968315	6	RP11-669M16.1	25743	intergenic	5.403	6	5	15	1	1	1
4:67255252:A:G	rs6854959	4	67255252	A	G	0.1681	1.03014e-05	-1.59603	0.358235	0.169378	rs67668930	7	RPS23P3	41557	intergenic	2.666	6	9	15	1	0	1
13:54893872:C:T	rs12867364	13	54893872	C	T	0.09565	1.03149e-05	-1.25314	0.281288	0.448129	rs11619037	18	RPL13AP25	120966	intergenic	3.153	6	4	15	0	0	1
13:54894828:A:G	rs34252061	13	54894828	G	A	0.09565	1.03149e-05	-1.25314	0.281288	0.448129	rs11619037	18	RPL13AP25	120010	intergenic	1.189	7	4	15	0	0	1
13:54894983:A:G	rs12872579	13	54894983	A	G	0.09525	1.03149e-05	-1.25314	0.281288	0.446993	rs11619037	18	RPL13AP25	119855	intergenic	10.17	6	4	15	0	0	1
13:54892091:C:G	rs11616266	13	54892091	G	C	0.1004	1.03225e-05	-1.25292	0.28125	0.433533	rs11619037	18	RPL13AP25	122747	intergenic	1.242	6	4	15	0	0	1
13:54892095:C:T	rs11617422	13	54892095	T	C	0.1004	1.03225e-05	-1.25292	0.28125	0.433533	rs11619037	18	RPL13AP25	122743	intergenic	2.779	7	4	15	0	0	1
13:54892121:C:T	rs11616255	13	54892121	C	T	0.09645	1.03258e-05	-1.25685	0.282138	0.45358	rs11619037	18	RPL13AP25	122717	intergenic	0.104	7	4	15	0	0	1
13:54890398:C:T	rs12869362	13	54890398	C	T	0.101	1.03269e-05	-1.25297	0.281267	0.436819	rs11619037	18	RPL13AP25	124440	intergenic	1.516	7	4	15	0	0	1
13:54890086:A:G	rs35240984	13	54890086	A	G	0.1012	1.03312e-05	-1.25313	0.28131	0.437204	rs11619037	18	RPL13AP25	124752	intergenic	1.723	6	4	15	0	0	1
13:54892063:C:T	rs11616249	13	54892063	C	T	0.09665	1.0378e-05	-1.25274	0.281285	0.443106	rs11619037	18	RPL13AP25	122775	intergenic	0.092	7	4	15	0	0	1
4:67231734:G:GT	rs35699883	4	67231734	GT	G	0.1408	1.0755e-05	-1.57377	0.354002	0.211991	rs67668930	7	RPS23P3	65075	intergenic	0.157	NA	9	15	0	0	1
4:67237678:A:G	rs112871900	4	67237678	A	G	0.2095	1.07763e-05	-1.61434	0.363162	0.321472	rs67668930	7	RPS23P3	59131	intergenic	2.337	7	9	15	0	0	1
4:67252886:C:CA	rs139856907	4	67252886	CA	C	0.2049	1.09492e-05	-1.59139	0.358286	0.304613	rs67668930	7	RPS23P3	43923	intergenic	4.041	NA	15	15	1	0	1
4:67251759:A:G	rs7697032	4	67251759	G	A	0.2051	1.10156e-05	-1.59112	0.358336	0.305455	rs67668930	7	RPS23P3	45050	intergenic	1.218	7	9	15	1	0	1
1:54469109:A:G	rs635045	1	54469109	G	A	0.3337	1.10791e-05	-0.709068	0.159735	0.416412	rs954878	1	LDLRAD1	5302	intergenic	0.94	5	5	15	1	1	1
4:67249640:C:T	rs72643109	4	67249640	T	C	0.2049	1.1088e-05	-1.5904	0.358292	0.304613	rs67668930	7	RPS23P3	47169	intergenic	0.168	7	9	15	1	0	1
7:9424047:A:G	rs74867337	7	9424047	A	G	0.03375	1.11009e-05	-1.62302	0.365661	0.667966	rs77755643	10	AC079756.1	210199	intergenic	3.368	7	9	15	0	0	1
7:9423414:G:T	rs76515157	7	9423414	T	G	0.03375	1.11091e-05	-1.62305	0.365682	0.667966	rs77755643	10	AC079756.1	210832	intergenic	0.776	7	9	15	0	0	1
13:54882605:A:T	rs36055839	13	54882605	A	T	0.103	1.11228e-05	-1.25301	0.282327	0.415887	rs11619037	18	RPL13AP25	132233	intergenic	2.802	6	5	15	0	0	1
4:67242685:G:T	rs17728252	4	67242685	G	T	0.0653	1.11832e-05	-1.91453	0.431498	0.21943	rs67668930	7	RPS23P3	54124	intergenic	3.949	4	7	15	0	0	1
4:67245233:C:G	rs62046702	4	67245233	G	C	0.0653	1.11832e-05	-1.91453	0.431498	0.21943	rs67668930	7	RPS23P3	51576	intergenic	0.243	6	15	15	0	0	1
4:67246600:A:T	rs55687359	4	67246600	T	A	0.0653	1.11833e-05	-1.91464	0.431523	0.21943	rs67668930	7	RPS23P3	50209	intergenic	3.426	6	15	15	0	0	1
4:67243198:A:G	rs72643105	4	67243198	G	A	0.2051	1.12969e-05	-1.58929	0.358379	0.30597	rs67668930	7	RPS23P3	53611	intergenic	0.537	5	9	15	0	0	1
4:67243901:C:T	rs7680998	4	67243901	C	T	0.2051	1.12969e-05	-1.58929	0.358379	0.30597	rs67668930	7	RPS23P3	52908	intergenic	1.511	6	15	15	0	0	1
4:67221397:C:T	rs13122515	4	67221397	C	T	0.05192	1.13769e-05	-1.89353	0.427134	0.158728	rs67668930	7	RPS23P3	75412	intergenic	0.141	7	9	15	0	0	1
4:67230308:C:T	rs17784079	4	67230308	T	C	0.05451	1.13832e-05	-1.89339	0.427115	0.186234	rs67668930	7	RPS23P3	66501	intergenic	12.93	6	9	15	0	0	1
4:67227459:A:G	rs17716638	4	67227459	A	G	0.05152	1.13867e-05	-1.89313	0.427062	0.155394	rs67668930	7	RPS23P3	69350	intergenic	9.824	7	9	15	0	0	1
4:67228015:A:T	rs13114529	4	67228015	T	A	0.05411	1.13867e-05	-1.89313	0.427062	0.181435	rs67668930	7	RPS23P3	68794	intergenic	3.919	6	15	15	0	0	1
4:67227834:A:G	rs13132396	4	67227834	G	A	0.05471	1.13997e-05	-1.89307	0.427075	0.181324	rs67668930	7	RPS23P3	68975	intergenic	3.51	6	15	15	0	0	1
4:67227993:A:G	rs13108964	4	67227993	A	G	0.05411	1.14115e-05	-1.89302	0.427085	0.181435	rs67668930	7	RPS23P3	68816	intergenic	3.672	7	15	15	0	0	1
4:67225557:A:T	rs11934326	4	67225557	A	T	0.05152	1.14559e-05	-1.89145	0.426815	0.155394	rs67668930	7	RPS23P3	71252	intergenic	7.245	6	7	15	0	0	1
4:67239293:C:T	rs7677846	4	67239293	T	C	0.2047	1.15323e-05	-1.58658	0.35814	0.307094	rs67668930	7	RPS23P3	57516	intergenic	0.229	6	7	15	0	0	1
1:54463596:A:G	rs666725	1	54463596	G	A	0.3339	1.18436e-05	-0.707527	0.159926	0.408431	rs954878	1	LDLRAD1	10815	intergenic	5.058	6	9	15	1	1	1
4:67278849:C:T	rs72643145	4	67278849	T	C	0.0651	1.18628e-05	-1.90919	0.43158	0.217666	rs67668930	7	RPS23P3	17960	intergenic	1.878	6	9	15	1	0	1
4:67268015:A:G	rs7436369	4	67268015	A	G	0.0621	1.18659e-05	-1.90999	0.431766	0.212603	rs67668930	7	RPS23P3	28794	intergenic	0.254	6	15	15	1	0	1
2:118950617:A:G	rs12612725	2	118950617	G	A	0.1729	1.18741e-05	-1.31268	0.29675	0.893776	rs2422177	4	AC093901.1	6654	intergenic	9.131	6	5	14	1	0	1
4:67271055:A:ATATATGTGTGTG	rs149134526	4	67271055	ATATATGTGTGTG	A	0.0653	1.18762e-05	-1.90986	0.431756	0.21943	rs67668930	7	RPS23P3	25754	intergenic	0.991	NA	9	15	1	0	1
4:67259406:A:G	rs56332155	4	67259406	G	A	0.0653	1.19137e-05	-1.90878	0.431581	0.21943	rs67668930	7	RPS23P3	37403	intergenic	2.018	7	9	15	1	0	1
4:67263776:A:T	rs72643125	4	67263776	T	A	0.0655	1.19194e-05	-1.90877	0.431589	0.218529	rs67668930	7	RPS23P3	33033	intergenic	8.075	6	9	15	1	0	1
4:67261333:G:T	rs6816747	4	67261333	T	G	0.0653	1.19201e-05	-1.90877	0.43159	0.21943	rs67668930	7	RPS23P3	35476	intergenic	0.765	7	9	15	1	0	1
4:67247204:A:C	rs6823395	4	67247204	C	A	0.0653	1.19212e-05	-1.90871	0.431579	0.21943	rs67668930	7	RPS23P3	49605	intergenic	4.297	6	15	15	1	0	1
4:67247638:C:G	rs72643107	4	67247638	G	C	0.0653	1.19212e-05	-1.90871	0.431579	0.21943	rs67668930	7	RPS23P3	49171	intergenic	0.232	7	15	15	1	0	1
4:67249827:A:T	rs72643110	4	67249827	A	T	0.0653	1.19212e-05	-1.90871	0.431579	0.21943	rs67668930	7	RPS23P3	46982	intergenic	3.583	7	9	15	1	0	1
4:67251707:A:C	rs72643115	4	67251707	C	A	0.0653	1.19212e-05	-1.90871	0.431579	0.21943	rs67668930	7	RPS23P3	45102	intergenic	2.039	7	9	15	1	0	1
4:67251901:A:AT	rs148076072	4	67251901	AT	A	0.0653	1.19212e-05	-1.90871	0.431579	0.21943	rs67668930	7	RPS23P3	44908	intergenic	2.04	NA	9	15	1	0	1
4:67255620:A:G	rs10517978	4	67255620	G	A	0.0653	1.19212e-05	-1.90871	0.431579	0.21943	rs67668930	7	RPS23P3	41189	intergenic	0.317	7	9	15	1	0	1
4:67256526:G:T	rs6835855	4	67256526	G	T	0.0653	1.19212e-05	-1.90871	0.431579	0.21943	rs67668930	7	RPS23P3	40283	intergenic	0.698	6	9	15	1	0	1
4:67260651:A:AAACT	rs151164770	4	67260651	AAACT	A	0.0655	1.19212e-05	-1.90871	0.431579	0.218529	rs67668930	7	RPS23P3	36158	intergenic	1.096	NA	9	15	1	0	1
4:67260745:C:T	rs72643119	4	67260745	C	T	0.0653	1.19212e-05	-1.90871	0.431579	0.21943	rs67668930	7	RPS23P3	36064	intergenic	1.437	6	9	15	1	0	1
4:67261807:A:G	rs72643120	4	67261807	A	G	0.0653	1.19212e-05	-1.90871	0.431579	0.21943	rs67668930	7	RPS23P3	35002	intergenic	2.882	6	9	15	1	0	1
4:67262321:A:T	rs72643122	4	67262321	A	T	0.0655	1.19212e-05	-1.90871	0.431579	0.218529	rs67668930	7	RPS23P3	34488	intergenic	3.366	7	9	15	1	0	1
4:67262412:C:T	rs72643123	4	67262412	C	T	0.0653	1.19212e-05	-1.90871	0.431579	0.21943	rs67668930	7	RPS23P3	34397	intergenic	6.885	5	9	15	1	0	1
4:67262912:C:T	rs72643124	4	67262912	T	C	0.0653	1.19212e-05	-1.90871	0.431579	0.21943	rs67668930	7	RPS23P3	33897	intergenic	8.68	7	9	15	1	0	1
4:67264574:G:T	rs72643126	4	67264574	T	G	0.0653	1.19212e-05	-1.90871	0.431579	0.21943	rs67668930	7	RPS23P3	32235	intergenic	8.356	6	9	15	1	0	1
4:67267167:C:G	rs138487407	4	67267167	C	G	0.0653	1.19212e-05	-1.90871	0.431579	0.21943	rs67668930	7	RPS23P3	29642	intergenic	0.538	6	9	15	1	0	1
4:67267212:A:T	rs149649059	4	67267212	T	A	0.0651	1.19212e-05	-1.90871	0.431579	0.217666	rs67668930	7	RPS23P3	29597	intergenic	3.901	7	9	15	1	0	1
4:67267620:C:T	rs4367224	4	67267620	C	T	0.0653	1.19212e-05	-1.90871	0.431579	0.21943	rs67668930	7	RPS23P3	29189	intergenic	1.139	7	15	15	1	0	1
4:67271294:C:T	rs116645654	4	67271294	C	T	0.0651	1.19212e-05	-1.90871	0.431579	0.217666	rs67668930	7	RPS23P3	25515	intergenic	0.309	7	9	15	1	0	1
4:67271296:C:T	rs114186485	4	67271296	C	T	0.0651	1.19212e-05	-1.90871	0.431579	0.217666	rs67668930	7	RPS23P3	25513	intergenic	1.587	7	9	15	1	0	1
4:67271546:A:C	rs144343454	4	67271546	C	A	0.0653	1.19212e-05	-1.90871	0.431579	0.215465	rs67668930	7	RPS23P3	25263	intergenic	1.306	6	9	15	1	0	1
4:67273923:A:T	rs1154969	4	67273923	A	T	0.0651	1.19212e-05	-1.90871	0.431579	0.217666	rs67668930	7	RPS23P3	22886	intergenic	5.213	5	15	15	1	0	1
4:67275802:C:T	rs17728801	4	67275802	C	T	0.0651	1.19212e-05	-1.90871	0.431579	0.217666	rs67668930	7	RPS23P3	21007	intergenic	3.393	6	15	15	1	0	1
4:67276827:A:G	rs72643140	4	67276827	A	G	0.0651	1.19212e-05	-1.90871	0.431579	0.217666	rs67668930	7	RPS23P3	19982	intergenic	0.062	7	9	15	1	0	1
4:67279770:A:T	rs116275903	4	67279770	T	A	0.0651	1.19212e-05	-1.90871	0.431579	0.217666	rs67668930	7	RPS23P3	17039	intergenic	2.656	5	9	15	1	0	1
4:67269134:C:T	rs7441686	4	67269134	C	T	0.0651	1.19271e-05	-1.90868	0.431582	0.220335	rs67668930	7	RPS23P3	27675	intergenic	0.508	7	9	15	1	0	1
4:67278820:G:T	rs116430396	4	67278820	G	T	0.0651	1.19469e-05	-1.90857	0.431593	0.217666	rs67668930	7	RPS23P3	17989	intergenic	1.794	7	9	15	1	0	1
4:67246998:A:T	rs6853337	4	67246998	T	A	0.2049	1.19489e-05	-1.58481	0.358383	0.304613	rs67668930	7	RPS23P3	49811	intergenic	3.558	6	15	15	1	0	1
4:67255293:A:T	rs55890046	4	67255293	A	T	0.0653	1.20232e-05	-1.90835	0.431684	0.21943	rs67668930	7	RPS23P3	41516	intergenic	2.039	7	9	15	1	0	1
4:14266052:A:G	rs73111379	4	14266052	G	A	0.1556	1.25284e-05	1.01603	0.230315	0.873795	rs1968315	6	RP11-669M16.1	21614	intergenic	0.476	7	5	15	1	1	1
17:10057833:A:C	rs11651197	17	10057833	A	C	0.08207	1.25391e-05	-1.12683	0.255443	0.402317	rs12935988	20	GAS7	0	intronic	2.395	6	5	15	1	0	1
13:54899101:C:T	rs74584709	13	54899101	T	C	0.103	1.26453e-05	-1.21666	0.275926	0.402222	rs11619037	18	RPL13AP25	115737	intergenic	2.035	6	5	15	0	0	1
2:118931332:C:G	rs6542430	2	118931332	G	C	0.09665	1.28319e-05	-1.37613	0.312325	0.42573	rs2422177	4	AC093901.1	0	ncRNA_intronic	1.371	5	5	15	1	0	1
4:67240940:C:T	rs72641702	4	67240940	C	T	0.1927	1.32549e-05	-1.58429	0.360164	0.289625	rs67668930	7	RPS23P3	55869	intergenic	0.625	6	7	15	0	0	1
4:67268012:A:G	rs7436368	4	67268012	A	G	0.07388	1.3675e-05	-1.84587	0.420304	0.232079	rs67668930	7	RPS23P3	28797	intergenic	3.381	6	15	15	1	0	1
4:67276155:C:T	rs11930224	4	67276155	T	C	0.07728	1.36924e-05	-1.84419	0.419948	0.238575	rs67668930	7	RPS23P3	20654	intergenic	2.098	7	15	15	1	0	1
4:67281572:A:G	rs11933206	4	67281572	G	A	0.07668	1.37332e-05	-1.84466	0.420119	0.237242	rs67668930	7	RPS23P3	15237	intergenic	4.478	7	9	15	1	0	1
4:67255194:C:T	rs56352425	4	67255194	T	C	0.07708	1.37342e-05	-1.84461	0.420109	0.243259	rs67668930	7	RPS23P3	41615	intergenic	4.554	7	9	15	1	0	1
4:67257267:C:T	rs11943327	4	67257267	C	T	0.07728	1.37342e-05	-1.84461	0.420109	0.238575	rs67668930	7	RPS23P3	39542	intergenic	0.206	6	9	15	1	0	1
4:67258062:C:T	rs72643117	4	67258062	T	C	0.07728	1.37342e-05	-1.84461	0.420109	0.241159	rs67668930	7	RPS23P3	38747	intergenic	0.665	7	9	15	1	0	1
4:67260326:G:T	rs1511277	4	67260326	T	G	0.07728	1.37342e-05	-1.84461	0.420109	0.241159	rs67668930	7	RPS23P3	36483	intergenic	1.046	6	9	15	1	0	1
4:67269284:C:T	rs34841981	4	67269284	T	C	0.07708	1.37342e-05	-1.84461	0.420109	0.239403	rs67668930	7	RPS23P3	27525	intergenic	2.375	7	9	15	1	0	1
4:67270298:C:T	rs72643132	4	67270298	T	C	0.07748	1.37342e-05	-1.84461	0.420109	0.240328	rs67668930	7	RPS23P3	26511	intergenic	1.573	5	7	15	1	0	1
4:67279035:A:G	rs112955418	4	67279035	A	G	0.07728	1.37342e-05	-1.84461	0.420109	0.238575	rs67668930	7	RPS23P3	17774	intergenic	2.29	7	9	15	1	0	1
4:67279164:C:T	rs113959214	4	67279164	T	C	0.07728	1.3787e-05	-1.84207	0.419614	0.238575	rs67668930	7	RPS23P3	17645	intergenic	3.96	7	9	15	1	0	1
2:118945389:C:T	rs6542434	2	118945389	C	T	0.09924	1.38187e-05	-1.36107	0.310082	0.437958	rs2422177	4	AC093901.1	1426	intergenic	19.48	5	5	14	1	0	1
17:10070826:G:T	rs12936049	17	10070826	G	T	0.07368	1.4679e-05	-1.13444	0.259257	0.305145	rs12935988	20	GAS7	0	intronic	0.521	6	5	15	1	0	1
17:10071608:A:G	rs34748879	17	10071608	A	G	0.07368	1.46974e-05	-1.13441	0.259266	0.305145	rs12935988	20	GAS7	0	intronic	2.949	6	5	15	1	0	1
1:54471706:G:GA	rs113625633	1	54471706	GA	G	0.4002	1.47643e-05	-0.696857	0.159302	0.272081	rs954878	1	LDLRAD1	2705	intergenic	0.698	NA	7	15	1	0	1
14:50856449:C:G	rs10130714	14	50856449	G	C	0.2153	1.49804e-05	-0.794665	0.181798	0.328472	rs12896268	19	CDKL1	0	intronic	8.522	7	2	15	1	1	1
17:10071896:C:T	rs12939270	17	10071896	T	C	0.07368	1.50961e-05	-1.13156	0.258973	0.305145	rs12935988	20	GAS7	0	intronic	2.223	6	5	15	1	0	1
2:118949128:A:T	rs3849333	2	118949128	A	T	0.09884	1.52218e-05	-1.36245	0.311949	0.440637	rs2422177	4	AC093901.1	5165	intergenic	1.032	6	5	14	1	0	1
4:67325472:A:G	rs150368505	4	67325472	G	A	0.01917	1.56378e-05	-1.93259	0.443112	0.11099	rs67668930	7	RPS23P3	28232	intergenic	1.176	7	9	15	1	0	1
1:54469617:C:T	rs4927053	1	54469617	T	C	0.3916	1.60663e-05	-0.691343	0.158737	0.287506	rs954878	1	LDLRAD1	4794	intergenic	6.205	5	5	15	1	1	1
1:54468689:A:G	rs633315	1	54468689	A	G	0.3924	1.61448e-05	-0.691107	0.158723	0.285854	rs954878	1	LDLRAD1	5722	intergenic	1.325	7	5	15	1	1	1
1:54469227:A:G	rs635509	1	54469227	G	A	0.3916	1.61742e-05	-0.691031	0.158721	0.287506	rs954878	1	LDLRAD1	5184	intergenic	1.608	5	5	15	1	1	1
14:50854740:A:G	rs2016452	14	50854740	G	A	0.2218	1.63377e-05	-0.799182	0.183659	0.312734	rs12896268	19	CDKL1	0	intronic	0.835	NA	5	15	1	1	1
1:54468166:G:T	rs620907	1	54468166	G	T	0.3904	1.63447e-05	-0.688791	0.158293	0.28998	rs954878	1	LDLRAD1	6245	intergenic	0.163	6	7	15	1	1	1
4:67130164:A:G	rs13149681	4	67130164	G	A	0.04034	1.63637e-05	-1.86631	0.42893	0.405215	rs67668930	7	MIR1269A	12377	intergenic	0.22	7	9	15	1	0	1
4:67300612:A:G	rs115698258	4	67300612	A	G	0.04812	1.66587e-05	-1.87523	0.431382	0.312206	rs67668930	7	RPS23P3	3372	intergenic	3.338	6	9	15	1	0	1
2:118928678:A:C	rs4848495	2	118928678	C	A	0.2119	1.67931e-05	-1.32838	0.305712	0.694529	rs2422177	4	AC093901.1	0	ncRNA_intronic	1.933	7	5	15	1	0	1
4:67224085:A:G	rs13142032	4	67224085	G	A	0.05611	1.68062e-05	-1.84424	0.424449	0.181583	rs67668930	7	RPS23P3	72724	intergenic	7.579	5	5	15	0	0	1
4:67295492:A:G	rs868976	4	67295492	A	G	0.1132	1.70827e-05	-1.695	0.390434	0.249197	rs67668930	7	RPS23P3	1317	intergenic	3.317	7	9	15	1	0	1
12:41587048:A:G	rs146786549	12	41587048	A	G	0.01677	1.73117e-05	-3.00935	0.693674	0.167986	rs147468045	16	PDZRN4	0	intronic	2.944	6	5	15	1	0	1
4:67160507:C:T	rs13151607	4	67160507	C	T	0.04093	1.84132e-05	-1.85934	0.429986	0.515716	rs67668930	7	MIR1269A	17860	intergenic	0.552	5	7	15	1	0	1
4:67163601:A:G	rs35618975	4	67163601	G	A	0.04054	1.84815e-05	-1.85899	0.429988	0.511142	rs67668930	7	MIR1269A	20954	intergenic	12.49	5	9	15	1	0	1
4:67163749:A:C	rs35630788	4	67163749	C	A	0.04014	1.84815e-05	-1.85899	0.429988	0.511869	rs67668930	7	MIR1269A	21102	intergenic	9.18	6	9	15	1	0	1
4:67135708:G:T	rs114518531	4	67135708	T	G	0.04113	1.84854e-05	-1.85882	0.429954	0.512738	rs67668930	7	MIR1269A	6833	intergenic	3.546	6	9	15	1	0	1
4:67135974:C:T	rs72641630	4	67135974	T	C	0.04413	1.84854e-05	-1.85882	0.429954	0.547327	rs67668930	7	MIR1269A	6567	intergenic	4.324	5	9	15	1	0	1
4:67163499:C:T	rs34810172	4	67163499	T	C	0.04034	1.84969e-05	-1.85868	0.429935	0.514151	rs67668930	7	MIR1269A	20852	intergenic	6.306	7	14	15	1	0	1
4:67136592:A:C	rs74482402	4	67136592	A	C	0.04113	1.84981e-05	-1.85862	0.429924	0.512738	rs67668930	7	MIR1269A	5949	intergenic	3.212	6	9	15	1	0	1
4:67156602:A:G	rs35096368	4	67156602	G	A	0.04093	1.85018e-05	-1.85882	0.429975	0.515716	rs67668930	7	MIR1269A	13955	intergenic	0.691	7	9	15	1	0	1
4:67131879:C:T	rs13145575	4	67131879	T	C	0.04453	1.85632e-05	-1.85282	0.42866	0.472312	rs67668930	7	MIR1269A	10662	intergenic	5.809	4	7	15	1	0	1
4:67222124:C:G	rs72641691	4	67222124	C	G	0.0597	1.85743e-05	-1.83395	0.424309	0.172842	rs67668930	7	RPS23P3	74685	intergenic	0.347	6	9	15	0	0	1
4:67222625:C:T	rs36083664	4	67222625	T	C	0.05931	1.85743e-05	-1.83395	0.424309	0.174467	rs67668930	7	RPS23P3	74184	intergenic	6.062	7	7	15	0	0	1
4:67223114:G:T	rs35707449	4	67223114	T	G	0.05931	1.86033e-05	-1.83354	0.424249	0.174467	rs67668930	7	RPS23P3	73695	intergenic	7.295	5	5	15	0	0	1
4:67221128:A:G	rs1355435	4	67221128	G	A	0.05931	1.86076e-05	-1.83392	0.424341	0.176949	rs67668930	7	RPS23P3	75681	intergenic	0.221	NA	15	15	0	0	1
4:67282970:A:G	rs17087157	4	67282970	A	G	0.07808	1.93907e-05	-1.84857	0.428668	0.25748	rs67668930	7	RPS23P3	13839	intergenic	2.746	7	9	15	1	0	1
1:54468947:C:G	rs634532	1	54468947	C	G	0.3978	1.94931e-05	-0.685447	0.158994	0.276324	rs954878	1	LDLRAD1	5464	intergenic	0.587	6	5	15	1	1	1
1:54468321:C:T	rs664848	1	54468321	T	C	0.3976	1.96998e-05	-0.685057	0.158993	0.277167	rs954878	1	LDLRAD1	6090	intergenic	0.271	5	7	15	1	1	1
1:54467767:C:T	rs662603	1	54467767	C	T	0.3976	1.97178e-05	-0.685007	0.158989	0.276717	rs954878	1	LDLRAD1	6644	intergenic	6.684	5	7	15	1	1	1
1:54469120:C:G	rs635059	1	54469120	C	G	0.3978	1.9737e-05	-0.684972	0.158989	0.276324	rs954878	1	LDLRAD1	5291	intergenic	0.31	5	5	15	1	1	1
1:54468837:A:C	rs677481	1	54468837	C	A	0.3978	1.97394e-05	-0.684968	0.158989	0.276324	rs954878	1	LDLRAD1	5574	intergenic	1.628	7	5	15	1	1	1
1:54468638:C:G	rs676562	1	54468638	G	C	0.3976	1.97436e-05	-0.684958	0.158989	0.27541	rs954878	1	LDLRAD1	5773	intergenic	1.027	7	5	15	1	1	1
1:54468760:A:G	rs633697	1	54468760	G	A	0.3978	1.98273e-05	-0.684851	0.159	0.276324	rs954878	1	LDLRAD1	5651	intergenic	0.437	7	5	15	1	1	1
4:67134743:G:T	rs56211991	4	67134743	G	T	0.03454	2.00843e-05	-1.87241	0.435009	0.422509	rs67668930	7	MIR1269A	7798	intergenic	4.769	6	9	15	1	0	1
4:67151121:G:T	rs36104639	4	67151121	G	T	0.03375	2.01782e-05	-1.87226	0.435083	0.413473	rs67668930	7	MIR1269A	8474	intergenic	0.042	6	7	15	1	0	1
4:67138858:C:T	rs17714933	4	67138858	T	C	0.03435	2.01913e-05	-1.87057	0.434704	0.420288	rs67668930	7	MIR1269A	3683	intergenic	19.28	6	7	15	1	0	1
4:67189881:C:T	rs35028778	4	67189881	C	T	0.03335	2.01958e-05	-1.87218	0.435084	0.419524	rs67668930	7	MIR1269A	47234	intergenic	0.06	6	9	15	1	0	1
4:67192225:A:G	rs72641678	4	67192225	G	A	0.03355	2.02061e-05	-1.87207	0.435071	0.416481	rs67668930	7	MIR1269A	49578	intergenic	0.115	6	14	15	1	0	1
4:67172641:A:G	rs35324365	4	67172641	G	A	0.03375	2.02125e-05	-1.872	0.435062	0.42405	rs67668930	7	MIR1269A	29994	intergenic	0.036	6	9	15	1	0	1
4:67160887:C:G	rs13106117	4	67160887	C	G	0.03375	2.02204e-05	-1.87186	0.435038	0.42405	rs67668930	7	MIR1269A	18240	intergenic	0.366	6	7	15	1	0	1
4:67164826:C:T	rs35892988	4	67164826	T	C	0.03375	2.02204e-05	-1.87186	0.435038	0.42405	rs67668930	7	MIR1269A	22179	intergenic	4.061	6	9	15	1	0	1
4:67166054:C:T	rs34697146	4	67166054	T	C	0.03375	2.02204e-05	-1.87186	0.435038	0.42405	rs67668930	7	MIR1269A	23407	intergenic	2.347	5	15	15	1	0	1
4:67156110:C:G	rs66532564	4	67156110	C	G	0.03395	2.02867e-05	-1.87161	0.435056	0.426266	rs67668930	7	MIR1269A	13463	intergenic	0.463	7	9	15	1	0	1
4:67156656:C:T	rs34456439	4	67156656	C	T	0.03395	2.0319e-05	-1.8713	0.435021	0.426266	rs67668930	7	MIR1269A	14009	intergenic	0.331	7	9	15	1	0	1
4:67157155:C:T	rs72641646	4	67157155	T	C	0.03395	2.0319e-05	-1.8713	0.435021	0.426266	rs67668930	7	MIR1269A	14508	intergenic	1.887	7	9	15	1	0	1
1:54467342:C:T	rs650134	1	54467342	C	T	0.3976	2.04906e-05	-0.684211	0.15913	0.275839	rs954878	1	LDLRAD1	7069	intergenic	0.629	4	7	15	1	1	1
1:54462969:A:C	rs72480623	1	54462969	A	C	0.3882	2.05897e-05	-0.685049	0.159366	0.295968	rs954878	1	LDLRAD1	11442	intergenic	0.028	6	14	15	1	1	1
1:54466789:C:G	rs11206271	1	54466789	G	C	0.3974	2.07883e-05	-0.684473	0.159314	0.274926	rs954878	1	LDLRAD1	7622	intergenic	0.002	5	14	15	1	1	1
4:14259566:A:G	rs75078922	4	14259566	A	G	0.136	2.07888e-05	1.00919	0.234892	0.901533	rs1968315	6	RP11-669M16.1	15128	intergenic	1.832	6	5	15	1	1	1
7:9394990:C:T	rs144237608	7	9394990	C	T	0.05371	2.08004e-05	-1.51341	0.352263	0.33063	rs77755643	10	AC079756.1	239256	intergenic	1.667	7	5	15	0	0	1
1:54465705:A:G	rs7513522	1	54465705	G	A	0.3872	2.08051e-05	-0.684613	0.159353	0.296322	rs954878	1	LDLRAD1	8706	intergenic	4.628	5	7	15	1	1	1
4:14259462:A:T	rs78789616	4	14259462	T	A	0.136	2.08243e-05	1.00913	0.2349	0.901533	rs1968315	6	RP11-669M16.1	15024	intergenic	0.748	7	5	15	1	1	1
4:67220783:C:G	rs1355436	4	67220783	G	C	0.1532	2.08381e-05	-1.68669	0.392633	0.240851	rs67668930	7	RPS23P3	76026	intergenic	0.385	6	15	15	0	0	1
1:54469948:G:T	rs665817	1	54469948	G	T	0.3978	2.09491e-05	-0.68252	0.158925	0.276324	rs954878	1	LDLRAD1	4463	intergenic	1.709	5	5	15	1	1	1
1:54470035:C:G	rs11206272	1	54470035	C	G	0.3978	2.10012e-05	-0.682425	0.158924	0.276324	rs954878	1	LDLRAD1	4376	intergenic	1.368	5	5	15	1	1	1
1:54466145:A:G	rs12758219	1	54466145	A	G	0.3986	2.10033e-05	-0.683557	0.159188	0.273435	rs954878	1	LDLRAD1	8266	intergenic	2.617	7	7	15	1	1	1
1:54466383:C:T	rs12740238	1	54466383	C	T	0.3972	2.10121e-05	-0.683519	0.159183	0.275318	rs954878	1	LDLRAD1	8028	intergenic	0.282	6	7	15	1	1	1
1:54469976:C:T	rs585269	1	54469976	T	C	0.3976	2.10228e-05	-0.682449	0.158938	0.276288	rs954878	1	LDLRAD1	4435	intergenic	1.29	5	5	15	1	1	1
1:54466956:A:G	rs605182	1	54466956	G	A	0.3976	2.1138e-05	-0.683346	0.159193	0.275839	rs954878	1	LDLRAD1	7455	intergenic	8.514	5	14	15	1	1	1
1:54467026:A:T	rs605272	1	54467026	A	T	0.3976	2.11751e-05	-0.683285	0.159194	0.275839	rs954878	1	LDLRAD1	7385	intergenic	1.926	6	13	15	1	0	1
13:54837925:A:T	rs76057548	13	54837925	T	A	0.1436	2.1194e-05	-1.26142	0.293903	0.420806	rs11619037	18	LINC00458	130923	intergenic	8.711	6	3	15	0	0	1
4:67156610:A:G	rs34110728	4	67156610	G	A	0.04732	2.14276e-05	-1.80468	0.420728	0.600756	rs67668930	7	MIR1269A	13963	intergenic	0.773	7	9	15	1	0	1
4:67165993:A:G	rs35755819	4	67165993	G	A	0.03454	2.14879e-05	-1.86591	0.435067	0.41222	rs67668930	7	MIR1269A	23346	intergenic	0.068	5	15	15	1	0	1
1:54471747:C:T	rs72664114	1	54471747	C	T	0.398	2.17458e-05	-0.68217	0.159161	0.279	rs954878	1	LDLRAD1	2664	intergenic	1.13	6	7	15	1	1	1
1:54469883:C:T	rs665421	1	54469883	C	T	0.399	2.29904e-05	-0.675908	0.158174	0.273957	rs954878	1	LDLRAD1	4528	intergenic	2.056	5	5	15	1	1	1
4:67262138:A:G	rs72643121	4	67262138	G	A	0.05691	2.32082e-05	-1.86535	0.436746	0.263033	rs67668930	7	RPS23P3	34671	intergenic	0.089	7	9	15	1	0	1
7:9442907:G:T	rs529016536	7	9442907	G	T	0.02436	2.33479e-05	-1.54925	0.362854	0.905263	rs77755643	10	AC079756.1	191339	intergenic	0.662	NA	15	15	0	0	0
7:9444848:C:G	rs74660029	7	9444848	G	C	0.02556	2.33742e-05	-1.54906	0.362831	0.864042	rs77755643	10	AC079756.1	189398	intergenic	0.469	5	9	15	0	0	0
7:9443064:A:C	rs151081406	7	9443064	C	A	0.02436	2.34023e-05	-1.54907	0.362858	0.905263	rs77755643	10	AC079756.1	191182	intergenic	0.769	7	15	15	0	0	0
7:9443265:C:T	rs373218671	7	9443265	C	T	0.02436	2.34136e-05	-1.54901	0.362851	0.905263	rs77755643	10	AC079756.1	190981	intergenic	0.949	6	15	15	0	0	0
7:9444257:C:T	rs9942619	7	9444257	C	T	0.02576	2.34148e-05	-1.54896	0.362841	0.857518	rs77755643	10	AC079756.1	189989	intergenic	0.308	5	1	15	0	0	0
1:54471157:A:G	rs681617	1	54471157	G	A	0.3982	2.34396e-05	-0.679077	0.159082	0.278606	rs954878	1	LDLRAD1	3254	intergenic	0.449	7	7	15	1	1	1
1:54470234:A:G	rs12075159	1	54470234	G	A	0.397	2.35038e-05	-0.678971	0.159081	0.277039	rs954878	1	LDLRAD1	4177	intergenic	1.955	7	5	15	1	1	1
1:54470757:C:T	rs679801	1	54470757	C	T	0.3982	2.351e-05	-0.678981	0.159085	0.278606	rs954878	1	LDLRAD1	3654	intergenic	7.717	5	5	15	1	1	1
1:54470237:C:T	rs666828	1	54470237	C	T	0.3976	2.35223e-05	-0.67894	0.15908	0.274533	rs954878	1	LDLRAD1	4174	intergenic	2.004	7	5	15	1	1	1
1:54470599:G:GTGT	rs78836052	1	54470599	G	GTGT	0.3972	2.35958e-05	-0.67883	0.159081	0.280603	rs954878	1	LDLRAD1	3812	intergenic	1.451	NA	5	15	1	1	1
7:9499108:C:T	rs11976233	7	9499108	T	C	0.03994	2.48429e-05	-1.49773	0.35197	0.494694	rs77755643	10	AC079756.1	135138	intergenic	1.432	7	9	15	0	0	1
7:9498374:A:G	rs13340519	7	9498374	G	A	0.03674	2.48602e-05	-1.49752	0.351934	0.55007	rs77755643	10	AC079756.1	135872	intergenic	8.888	7	9	15	0	0	1
7:9499684:G:T	rs117103503	7	9499684	T	G	0.03794	2.48602e-05	-1.49752	0.351934	0.532281	rs77755643	10	AC079756.1	134562	intergenic	3.658	7	9	15	0	0	1
4:67128015:C:T	rs35080710	4	67128015	T	C	0.01977	2.48676e-05	-1.90421	0.447518	0.198616	rs67668930	7	MIR1269A	14526	intergenic	0.895	6	9	15	1	0	1
4:67146170:C:T	rs35759060	4	67146170	T	C	0.04193	2.48878e-05	-1.80681	0.424647	0.476	rs67668930	7	MIR1269A	3523	intergenic	4.894	7	15	15	1	0	1
14:50858203:C:T	rs7154929	14	50858203	T	C	0.4459	2.49151e-05	-0.675689	0.158814	0.536701	rs12896268	19	CDKL1	0	intronic	2.862	5	4	15	1	1	1
4:67158125:A:G	rs35765506	4	67158125	A	G	0.01657	2.49733e-05	-1.90395	0.44756	0.179731	rs67668930	7	MIR1269A	15478	intergenic	1.591	6	9	15	1	0	1
4:67157025:G:T	rs72641644	4	67157025	T	G	0.02256	2.49859e-05	-1.90379	0.447536	0.261678	rs67668930	7	MIR1269A	14378	intergenic	2.713	6	9	15	1	0	1
7:9499766:C:G	rs141377144	7	9499766	G	C	0.04113	2.51638e-05	-1.49771	0.352212	0.480031	rs77755643	10	AC079756.1	134480	intergenic	1.831	6	9	15	0	0	1
7:9497920:C:T	rs11970850	7	9497920	C	T	0.03954	2.52076e-05	-1.49721	0.352128	0.499767	rs77755643	10	AC079756.1	136326	intergenic	0.658	6	9	15	0	0	1
7:9431120:A:G	rs79929498	7	9431120	A	G	0.02436	2.55655e-05	-1.54634	0.363963	0.905263	rs77755643	10	AC079756.1	203126	intergenic	0.06	5	7	15	0	0	1
7:9481467:C:G	rs12111843	7	9481467	G	C	0.03315	2.55931e-05	-1.52734	0.359512	0.49737	rs77755643	10	AC079756.1	152779	intergenic	0.239	7	9	15	0	0	1
2:118941209:C:T	rs3912498	2	118941209	C	T	0.1392	2.56309e-05	-1.25677	0.295847	0.674301	rs2422177	4	AC093901.1	0	ncRNA_intronic	16.94	NA	5	15	1	0	1
7:9435687:A:T	rs78397597	7	9435687	T	A	0.02436	2.5765e-05	-1.54939	0.364834	0.905263	rs77755643	10	AC079756.1	198559	intergenic	4.036	7	9	15	0	0	1
1:54463295:A:G	rs655165	1	54463295	G	A	0.3946	2.59688e-05	-0.676752	0.159424	0.284087	rs954878	1	LDLRAD1	11116	intergenic	0.04	6	14	15	1	1	1
1:54463279:C:T	rs603257	1	54463279	C	T	0.3946	2.59696e-05	-0.676751	0.159424	0.284087	rs954878	1	LDLRAD1	11132	intergenic	10.89	7	14	15	1	1	1
1:54462775:C:T	rs652924	1	54462775	C	T	0.3946	2.59836e-05	-0.676731	0.159424	0.284087	rs954878	1	LDLRAD1	11636	intergenic	6.507	6	14	15	1	1	1
1:54461703:A:G	rs637590	1	54461703	G	A	0.393	2.59851e-05	-0.676728	0.159423	0.286865	rs954878	1	LDLRAD1	12708	intergenic	9.74	5	14	15	1	1	1
1:54463775:G:T	rs605480	1	54463775	T	G	0.3946	2.59974e-05	-0.676715	0.159425	0.284087	rs954878	1	LDLRAD1	10636	intergenic	2.846	6	9	15	1	1	1
1:54465498:A:T	rs7513328	1	54465498	T	A	0.3924	2.59981e-05	-0.676691	0.159419	0.285933	rs954878	1	LDLRAD1	8913	intergenic	4.085	6	7	15	1	1	1
1:54462640:C:T	rs652124	1	54462640	C	T	0.3978	2.60519e-05	-0.676784	0.159459	0.283966	rs954878	1	LDLRAD1	11771	intergenic	3.904	7	14	15	1	0	1
4:67128878:C:T	rs35749355	4	67128878	T	C	0.04453	2.61566e-05	-1.80276	0.424847	0.472312	rs67668930	7	MIR1269A	13663	intergenic	1.664	7	9	15	1	0	1
4:67130031:C:T	rs13150923	4	67130031	C	T	0.04453	2.61615e-05	-1.80418	0.425185	0.472312	rs67668930	7	MIR1269A	12510	intergenic	0.246	7	9	15	1	0	1
4:67128940:C:T	rs34908018	4	67128940	T	C	0.04453	2.61663e-05	-1.80268	0.424837	0.472312	rs67668930	7	MIR1269A	13601	intergenic	6.663	7	9	15	1	0	1
4:67128846:A:G	rs35028404	4	67128846	A	G	0.04453	2.61677e-05	-1.80263	0.424827	0.472312	rs67668930	7	MIR1269A	13695	intergenic	3.127	5	9	15	1	0	1
4:67133109:T:TCTC	rs34643562	4	67133109	TCTC	T	0.04433	2.61886e-05	-1.8043	0.425238	0.474837	rs67668930	7	MIR1269A	9432	intergenic	0.876	NA	9	15	1	0	1
4:67130107:C:T	rs13131814	4	67130107	T	C	0.04453	2.63118e-05	-1.80322	0.425093	0.472312	rs67668930	7	MIR1269A	12434	intergenic	3.204	7	9	15	1	0	1
4:67132385:C:G	rs13114810	4	67132385	C	G	0.04453	2.63165e-05	-1.80203	0.424816	0.472312	rs67668930	7	MIR1269A	10156	intergenic	4.173	5	9	15	1	0	1
4:67131370:A:T	rs72641620	4	67131370	A	T	0.04553	2.63421e-05	-1.80206	0.424846	0.46	rs67668930	7	MIR1269A	11171	intergenic	0.359	6	9	15	1	0	1
4:67130880:C:T	rs71612761	4	67130880	T	C	0.04453	2.63443e-05	-1.8021	0.424857	0.472312	rs67668930	7	MIR1269A	11661	intergenic	6.891	6	9	15	1	0	1
4:67131375:C:T	rs13107500	4	67131375	C	T	0.04453	2.63469e-05	-1.80205	0.424848	0.472312	rs67668930	7	MIR1269A	11166	intergenic	0.95	6	9	15	1	0	1
4:67130119:C:T	rs13131824	4	67130119	T	C	0.04453	2.63498e-05	-1.80195	0.424826	0.472312	rs67668930	7	MIR1269A	12422	intergenic	3.123	7	9	15	1	0	1
4:67131460:C:T	rs13139833	4	67131460	T	C	0.04473	2.63498e-05	-1.80195	0.424826	0.469808	rs67668930	7	MIR1269A	11081	intergenic	3.525	7	9	15	1	0	1
4:67131491:C:T	rs13107735	4	67131491	C	T	0.04453	2.63498e-05	-1.80195	0.424826	0.472312	rs67668930	7	MIR1269A	11050	intergenic	0.129	6	9	15	1	0	1
4:67131492:A:G	rs13134440	4	67131492	A	G	0.04453	2.63498e-05	-1.80195	0.424826	0.472312	rs67668930	7	MIR1269A	11049	intergenic	3.527	6	9	15	1	0	1
4:67129190:A:G	rs10517975	4	67129190	A	G	0.04453	2.63512e-05	-1.8019	0.424816	0.472312	rs67668930	7	MIR1269A	13351	intergenic	1.847	NA	9	15	1	0	1
4:67129231:A:T	rs10517974	4	67129231	T	A	0.04453	2.63512e-05	-1.8019	0.424816	0.472312	rs67668930	7	MIR1269A	13310	intergenic	0.444	6	9	15	1	0	1
4:67129317:A:C	rs10517973	4	67129317	A	C	0.04453	2.63512e-05	-1.8019	0.424816	0.472312	rs67668930	7	MIR1269A	13224	intergenic	0.447	NA	9	15	1	0	1
4:67129353:A:G	rs10517972	4	67129353	G	A	0.04453	2.63512e-05	-1.8019	0.424816	0.472312	rs67668930	7	MIR1269A	13188	intergenic	0.24	NA	9	15	1	0	1
4:67129456:T:TA	rs71659217	4	67129456	T	TA	0.04453	2.63512e-05	-1.8019	0.424816	0.472312	rs67668930	7	MIR1269A	13085	intergenic	3.443	NA	9	15	1	0	1
4:67129531:C:T	rs10517970	4	67129531	T	C	0.04453	2.63512e-05	-1.8019	0.424816	0.472312	rs67668930	7	MIR1269A	13010	intergenic	3.674	NA	9	15	1	0	1
4:67129570:C:T	rs10517969	4	67129570	C	T	0.04473	2.63512e-05	-1.8019	0.424816	0.469808	rs67668930	7	MIR1269A	12971	intergenic	4.516	NA	9	15	1	0	1
4:67129630:C:T	rs72641615	4	67129630	T	C	0.04453	2.63512e-05	-1.8019	0.424816	0.472312	rs67668930	7	MIR1269A	12911	intergenic	5.408	7	9	15	1	0	1
4:67129641:A:G	rs72641616	4	67129641	A	G	0.04453	2.63512e-05	-1.8019	0.424816	0.472312	rs67668930	7	MIR1269A	12900	intergenic	3.413	6	9	15	1	0	1
4:67130214:A:G	rs35583101	4	67130214	A	G	0.04453	2.63512e-05	-1.8019	0.424816	0.472312	rs67668930	7	MIR1269A	12327	intergenic	0.446	7	9	15	1	0	1
4:67130297:C:T	rs17838961	4	67130297	T	C	0.04453	2.63512e-05	-1.8019	0.424816	0.472312	rs67668930	7	MIR1269A	12244	intergenic	4.61	7	9	15	1	0	1
4:67130826:A:C	rs71612760	4	67130826	C	A	0.04453	2.63512e-05	-1.8019	0.424816	0.472312	rs67668930	7	MIR1269A	11715	intergenic	6.561	7	9	15	1	0	1
4:67130920:A:G	rs71612762	4	67130920	G	A	0.04453	2.63512e-05	-1.8019	0.424816	0.472312	rs67668930	7	MIR1269A	11621	intergenic	2.405	7	9	15	1	0	1
4:67130984:A:G	rs71612763	4	67130984	A	G	0.04453	2.63512e-05	-1.8019	0.424816	0.472312	rs67668930	7	MIR1269A	11557	intergenic	0.945	6	9	15	1	0	1
4:67131010:G:GCAT	rs68144451	4	67131010	GCAT	G	0.04453	2.63512e-05	-1.8019	0.424816	0.472312	rs67668930	7	MIR1269A	11531	intergenic	5.336	NA	9	15	1	0	1
4:67131595:C:T	rs13107954	4	67131595	C	T	0.04453	2.63512e-05	-1.8019	0.424816	0.472312	rs67668930	7	MIR1269A	10946	intergenic	3.143	7	9	15	1	0	1
4:67131738:A:G	rs13111848	4	67131738	G	A	0.04433	2.63512e-05	-1.8019	0.424816	0.470021	rs67668930	7	MIR1269A	10803	intergenic	0.122	7	7	15	1	0	1
4:67131812:C:T	rs13113516	4	67131812	C	T	0.04453	2.63512e-05	-1.8019	0.424816	0.472312	rs67668930	7	MIR1269A	10729	intergenic	1.812	5	7	15	1	0	1
4:67131813:C:G	rs13111921	4	67131813	G	C	0.04453	2.63512e-05	-1.8019	0.424816	0.472312	rs67668930	7	MIR1269A	10728	intergenic	1.2	5	7	15	1	0	1
4:67131934:C:G	rs13113894	4	67131934	C	G	0.04453	2.63512e-05	-1.8019	0.424816	0.472312	rs67668930	7	MIR1269A	10607	intergenic	0.069	4	7	15	1	0	1
4:67132068:A:G	rs13112620	4	67132068	G	A	0.04453	2.63512e-05	-1.8019	0.424816	0.472312	rs67668930	7	MIR1269A	10473	intergenic	9.659	4	7	15	1	0	1
4:67132512:A:C	rs13115053	4	67132512	C	A	0.04453	2.63512e-05	-1.8019	0.424816	0.472312	rs67668930	7	MIR1269A	10029	intergenic	1.226	5	9	15	1	0	1
4:67132611:A:G	rs13113717	4	67132611	G	A	0.04453	2.63512e-05	-1.8019	0.424816	0.472312	rs67668930	7	MIR1269A	9930	intergenic	1.699	6	9	15	1	0	1
4:67132663:C:T	rs13147393	4	67132663	T	C	0.04453	2.63512e-05	-1.8019	0.424816	0.472312	rs67668930	7	MIR1269A	9878	intergenic	0.514	6	9	15	1	0	1
4:67132674:A:T	rs13147401	4	67132674	T	A	0.04453	2.63512e-05	-1.8019	0.424816	0.472312	rs67668930	7	MIR1269A	9867	intergenic	3.137	7	9	15	1	0	1
4:67132708:C:G	rs13113927	4	67132708	G	C	0.04453	2.63512e-05	-1.8019	0.424816	0.472312	rs67668930	7	MIR1269A	9833	intergenic	1.479	7	9	15	1	0	1
4:67132778:G:T	rs13119186	4	67132778	G	T	0.04453	2.63512e-05	-1.8019	0.424816	0.472312	rs67668930	7	MIR1269A	9763	intergenic	2.202	7	9	15	1	0	1
4:67132863:A:G	rs13119418	4	67132863	G	A	0.04453	2.63512e-05	-1.8019	0.424816	0.472312	rs67668930	7	MIR1269A	9678	intergenic	2.277	7	9	15	1	0	1
4:67132882:A:G	rs13119440	4	67132882	G	A	0.04453	2.63512e-05	-1.8019	0.424816	0.472312	rs67668930	7	MIR1269A	9659	intergenic	4.328	7	9	15	1	0	1
4:67133346:A:G	rs35358552	4	67133346	G	A	0.04373	2.63512e-05	-1.8019	0.424816	0.481728	rs67668930	7	MIR1269A	9195	intergenic	3.315	7	9	15	1	0	1
4:67133365:C:T	rs34134312	4	67133365	T	C	0.04373	2.63512e-05	-1.8019	0.424816	0.481728	rs67668930	7	MIR1269A	9176	intergenic	8.139	7	9	15	1	0	1
4:67133397:A:T	rs36044013	4	67133397	A	T	0.04413	2.63512e-05	-1.8019	0.424816	0.481814	rs67668930	7	MIR1269A	9144	intergenic	7.87	7	9	15	1	0	1
4:67133457:A:G	rs13148783	4	67133457	A	G	0.04373	2.63512e-05	-1.8019	0.424816	0.481728	rs67668930	7	MIR1269A	9084	intergenic	3.153	6	9	15	1	0	1
4:67133545:A:G	rs13148985	4	67133545	A	G	0.04373	2.63512e-05	-1.8019	0.424816	0.481728	rs67668930	7	MIR1269A	8996	intergenic	4.61	7	9	15	1	0	1
4:67132050:G:GT	rs34215182	4	67132050	G	GT	0.04453	2.63555e-05	-1.80197	0.424836	0.472312	rs67668930	7	MIR1269A	10491	intergenic	7.349	NA	7	15	1	0	1
4:67133161:C:T	rs35943387	4	67133161	C	T	0.04453	2.63647e-05	-1.80186	0.424819	0.472312	rs67668930	7	MIR1269A	9380	intergenic	0.124	7	9	15	1	0	1
4:67131708:C:T	rs13140283	4	67131708	T	C	0.04433	2.63765e-05	-1.80157	0.424762	0.470021	rs67668930	7	MIR1269A	10833	intergenic	4.963	6	7	15	1	0	1
7:9474205:C:T	rs11976821	7	9474205	C	T	0.03774	2.70108e-05	-1.50254	0.35472	0.569555	rs77755643	10	AC079756.1	160041	intergenic	8.34	7	9	15	0	0	0
4:67300648:C:T	rs80253017	4	67300648	T	C	0.05331	2.71506e-05	-1.82096	0.430015	0.287169	rs67668930	7	RPS23P3	3408	intergenic	3.324	7	9	15	1	0	1
7:9478611:A:C	rs190810075	7	9478611	A	C	0.03914	2.72465e-05	-1.50322	0.35505	0.554707	rs77755643	10	AC079756.1	155635	intergenic	0.356	6	15	15	0	0	0
1:160356741:C:T	rs10908779	1	160356741	C	T	0.1428	2.72505e-05	-0.995478	0.235127	0.306892	rs77847479	2	RNU4-42P	5816	intergenic	0.641	6	9	15	1	1	1
7:9480394:A:G	rs180936948	7	9480394	A	G	0.03814	2.73041e-05	-1.50236	0.354888	0.563522	rs77755643	10	AC079756.1	153852	intergenic	0.476	6	15	15	0	0	1
7:9480666:A:T	rs149749466	7	9480666	T	A	0.03714	2.73041e-05	-1.50236	0.354888	0.578833	rs77755643	10	AC079756.1	153580	intergenic	0.286	7	9	15	0	0	1
7:9481000:A:G	rs12113588	7	9481000	A	G	0.03794	2.73041e-05	-1.50236	0.354888	0.566524	rs77755643	10	AC079756.1	153246	intergenic	0.656	6	9	15	0	0	1
7:9484204:C:T	rs11981300	7	9484204	C	T	0.03814	2.73041e-05	-1.50236	0.354888	0.563522	rs77755643	10	AC079756.1	150042	intergenic	0.842	7	9	15	0	0	1
7:9477139:C:T	rs140270188	7	9477139	C	T	0.03954	2.74882e-05	-1.50181	0.354889	0.543313	rs77755643	10	AC079756.1	157107	intergenic	1.013	7	9	15	0	0	0
7:9478158:A:T	rs56261651	7	9478158	T	A	0.03934	2.74994e-05	-1.50177	0.354888	0.546117	rs77755643	10	AC079756.1	156088	intergenic	0.285	7	9	15	0	0	0
7:9473970:A:T	rs11980945	7	9473970	T	A	0.03994	2.75103e-05	-1.50174	0.354887	0.537784	rs77755643	10	AC079756.1	160276	intergenic	2.455	6	9	15	0	0	0
7:9475995:A:T	rs75618195	7	9475995	T	A	0.03894	2.75103e-05	-1.50174	0.354887	0.551807	rs77755643	10	AC079756.1	158251	intergenic	4.663	7	9	15	0	0	0
7:9476184:C:T	rs11973653	7	9476184	C	T	0.03774	2.75103e-05	-1.50174	0.354887	0.569555	rs77755643	10	AC079756.1	158062	intergenic	1.007	7	9	15	0	0	0
7:9476362:C:T	rs143146339	7	9476362	T	C	0.03774	2.75103e-05	-1.50174	0.354887	0.569555	rs77755643	10	AC079756.1	157884	intergenic	1.004	7	8	15	0	0	0
7:9476406:C:G	rs11974388	7	9476406	C	G	0.03774	2.75103e-05	-1.50174	0.354887	0.569555	rs77755643	10	AC079756.1	157840	intergenic	0.011	7	8	15	0	0	0
7:9477397:G:GA	rs149482543	7	9477397	GA	G	0.03774	2.75103e-05	-1.50174	0.354887	0.569555	rs77755643	10	AC079756.1	156849	intergenic	1.397	NA	9	15	0	0	0
7:9478737:A:C	rs182164964	7	9478737	C	A	0.03914	2.75103e-05	-1.50174	0.354887	0.548948	rs77755643	10	AC079756.1	155509	intergenic	0.22	7	15	15	0	0	0
4:116031021:C:T	rs551248	4	116031021	T	C	0.237	2.75693e-05	-0.893465	0.211167	0.818658	rs59230330	8	NDST4	0	intronic	4.969	NA	5	15	1	0	1
7:9488398:A:G	rs75683507	7	9488398	A	G	0.03634	2.76861e-05	-1.50199	0.355072	0.598269	rs77755643	10	AC079756.1	145848	intergenic	3.04	6	7	15	0	0	1
7:9475327:A:C	rs77714083	7	9475327	A	C	0.03994	2.7692e-05	-1.50144	0.354945	0.537784	rs77755643	10	AC079756.1	158919	intergenic	0.949	5	9	15	0	0	0
4:67133536:C:T	rs13122552	4	67133536	C	T	0.04473	2.76994e-05	-1.79684	0.424786	0.468813	rs67668930	7	MIR1269A	9005	intergenic	0.403	7	9	15	1	0	1
4:116056455:A:C	rs545915	4	116056455	C	A	0.2404	2.80125e-05	-0.899883	0.212871	0.799811	rs59230330	8	MRPS33P3	7682	intergenic	1.014	7	14	15	1	0	1
4:116059498:C:T	rs526515	4	116059498	C	T	0.2406	2.8023e-05	-0.899846	0.212866	0.799274	rs59230330	8	MRPS33P3	4639	intergenic	0.33	6	9	15	1	0	1
1:54473368:A:C	rs928441	1	54473368	C	A	0.3866	2.81299e-05	-0.676295	0.160017	0.275942	rs954878	1	LDLRAD1	1043	intergenic	2.776	5	5	15	1	1	1
1:54473488:C:G	rs928442	1	54473488	C	G	0.387	2.81801e-05	-0.676237	0.160019	0.275117	rs954878	1	LDLRAD1	923	downstream	1.708	5	5	15	1	1	1
4:67191541:A:G	rs66652771	4	67191541	A	G	0.03435	2.81894e-05	-1.79497	0.424755	0.425346	rs67668930	7	MIR1269A	48894	intergenic	0.939	6	14	15	1	0	1
4:67193085:A:G	rs72641679	4	67193085	A	G	0.03435	2.82119e-05	-1.79489	0.424755	0.425346	rs67668930	7	MIR1269A	50438	intergenic	1.08	7	14	15	0	0	1
1:54473516:A:G	rs928443	1	54473516	A	G	0.387	2.82343e-05	-0.676161	0.160018	0.275117	rs954878	1	LDLRAD1	895	downstream	0.828	NA	5	15	1	1	1
4:116053779:A:G	rs552791	4	116053779	A	G	0.2404	2.8276e-05	-0.899052	0.212784	0.799811	rs59230330	8	MRPS33P3	10358	intergenic	4.446	NA	14	15	1	0	1
1:54473548:C:G	rs928444	1	54473548	C	G	0.387	2.83237e-05	-0.67613	0.160038	0.275117	rs954878	1	LDLRAD1	863	downstream	3.014	5	5	15	1	1	1
2:118940024:C:T	rs4088768	2	118940024	T	C	0.1803	2.86205e-05	-1.22702	0.2906	0.558272	rs2422177	4	AC093901.1	0	ncRNA_intronic	0.991	NA	5	15	1	0	1
8:40908717:C:T	rs55663061	8	40908717	T	C	0.02296	2.87153e-05	2.04823	0.485181	0.848477	rs72632937	12	RNU6-356P	18199	intergenic	7.148	7	5	15	1	0	1
2:118944912:A:G	rs6756952	2	118944912	A	G	0.09984	2.87269e-05	-1.29049	0.305694	0.433759	rs2422177	4	AC093901.1	949	upstream	7.964	5	5	14	1	0	1
4:116050207:A:G	rs510499	4	116050207	G	A	0.2404	2.87789e-05	-0.898035	0.21275	0.799811	rs59230330	8	MRPS33P3	13930	intergenic	1.355	7	9	15	1	0	1
4:67128984:A:G	rs13141988	4	67128984	G	A	0.03734	2.88277e-05	-1.81362	0.429699	0.389439	rs67668930	7	MIR1269A	13557	intergenic	0.708	6	9	15	1	0	1
4:67132493:G:GT	rs34834102	4	67132493	G	GT	0.03734	2.89597e-05	-1.81305	0.429672	0.389439	rs67668930	7	MIR1269A	10048	intergenic	3.061	NA	9	15	1	0	1
4:67132715:A:C	rs13141975	4	67132715	A	C	0.03734	2.89597e-05	-1.81305	0.429672	0.389439	rs67668930	7	MIR1269A	9826	intergenic	2.873	7	9	15	1	0	1
7:108104786:A:G	rs111452225	7	108104786	G	A	0.05012	2.89614e-05	-1.80982	0.428907	0.148003	rs141901173	11	PNPLA8	6079	intergenic	7.134	7	5	15	1	1	1
4:116037505:A:G	rs4640690	4	116037505	G	A	0.2422	2.91653e-05	-0.889389	0.210857	0.794652	rs59230330	8	NDST4	2472	intergenic	2.127	7	5	15	1	0	1
4:116041701:C:T	rs559777	4	116041701	C	T	0.24	2.92604e-05	-0.889251	0.210863	0.803233	rs59230330	8	NDST4	6668	intergenic	3.398	6	5	15	1	0	1
4:116041833:C:G	rs560820	4	116041833	C	G	0.2402	2.92604e-05	-0.889231	0.210858	0.804303	rs59230330	8	NDST4	6800	intergenic	0.261	7	5	15	1	0	1
4:116042915:A:G	rs481502	4	116042915	A	G	0.2402	2.92651e-05	-0.889213	0.210855	0.804303	rs59230330	8	NDST4	7882	intergenic	5.798	5	5	15	1	0	1
4:116045221:C:G	rs579713	4	116045221	C	G	0.2402	2.92819e-05	-0.8892	0.210859	0.804303	rs59230330	8	NDST4	10188	intergenic	0.959	6	14	15	1	0	1
4:116043076:C:T	rs483276	4	116043076	T	C	0.2402	2.92835e-05	-0.889186	0.210856	0.804303	rs59230330	8	NDST4	8043	intergenic	4.083	5	5	15	1	0	1
4:116023846:A:G	rs28587893	4	116023846	A	G	0.2362	2.93472e-05	-0.889469	0.210949	0.824997	rs59230330	8	NDST4	0	intronic	0.829	6	15	15	1	0	1
4:116023061:A:G	rs532923	4	116023061	G	A	0.2366	2.93607e-05	-0.889439	0.210947	0.82359	rs59230330	8	NDST4	0	intronic	1.532	5	14	15	1	0	1
4:116040663:C:G	rs528860	4	116040663	C	G	0.24	2.95508e-05	-0.888626	0.21083	0.803233	rs59230330	8	NDST4	5630	intergenic	1.528	7	5	15	1	0	1
3:14380197:A:C	rs893082	3	14380197	A	C	0.4099	2.96182e-05	0.672755	0.159634	0.531486	rs13091718	5	RP11-536I6.1	9753	intergenic	2.095	NA	5	15	1	0	1
13:54907467:C:CT	rs35574512	13	54907467	CT	C	0.109	3.03813e-05	-1.1495	0.273144	0.369066	rs11619037	18	RPL13AP25	107371	intergenic	2.675	NA	5	15	0	0	1
13:54904664:A:G	rs7329690	13	54904664	A	G	0.1104	3.05216e-05	-1.14926	0.273157	0.369152	rs11619037	18	RPL13AP25	110174	intergenic	2.871	6	5	15	0	0	1
13:54904522:A:G	rs7329460	13	54904522	A	G	0.1104	3.05407e-05	-1.14923	0.273157	0.369152	rs11619037	18	RPL13AP25	110316	intergenic	3.106	7	5	15	0	0	1
7:9424458:A:G	rs79234912	7	9424458	G	A	0.03135	3.07823e-05	-1.44899	0.344557	0.722395	rs77755643	10	AC079756.1	209788	intergenic	2.086	7	9	15	0	0	1
2:118934355:A:G	rs3849332	2	118934355	G	A	0.137	3.07915e-05	-1.24342	0.295681	0.681159	rs2422177	4	AC093901.1	0	ncRNA_exonic	7.535	NA	2	15	1	0	1
1:173267654:A:C	rs61828279	1	173267654	C	A	0.06809	3.08836e-05	-1.19276	0.283681	0.673806	rs72724954	3	snoU13	17344	intergenic	10.61	3a	2	15	1	0	1
4:67240874:A:C	rs72641701	4	67240874	A	C	0.04133	3.10625e-05	-1.85128	0.440442	0.234809	rs67668930	7	RPS23P3	55935	intergenic	3.264	6	7	15	0	0	1
2:118944740:A:G	rs6542433	2	118944740	A	G	0.1352	3.11729e-05	-1.25534	0.29872	0.66324	rs2422177	4	AC093901.1	777	upstream	1.868	7	1	14	1	0	1
1:54472778:G:T	rs1023213	1	54472778	T	G	0.3934	3.16844e-05	-0.672256	0.160115	0.264559	rs954878	1	LDLRAD1	1633	intergenic	4.164	6	5	15	1	1	1
4:67195431:A:T	rs2292492	4	67195431	T	A	0.02316	3.17679e-05	-1.85377	0.441588	0.238808	rs67668930	7	MIR1269A	52784	intergenic	2.599	6	5	15	0	0	1
13:54909852:G:T	rs7328585	13	54909852	G	T	0.109	3.17821e-05	-1.14633	0.273075	0.369066	rs11619037	18	RPL13AP25	104986	intergenic	2.323	7	5	15	0	0	1
1:173264514:A:C	rs12128548	1	173264514	C	A	0.06809	3.2515e-05	-1.18863	0.283512	0.677908	rs72724954	3	snoU13	14204	intergenic	0.705	6	5	15	1	0	1
4:67127341:G:T	rs34306009	4	67127341	T	G	0.03694	3.2561e-05	-1.80147	0.429721	0.243658	rs67668930	7	MIR1269A	15200	intergenic	1.166	5	9	15	1	0	1
4:67126314:C:CT	rs34364590	4	67126314	CT	C	0.03954	3.27184e-05	-1.80174	0.4299	0.172884	rs67668930	7	MIR1269A	16227	intergenic	0.753	NA	9	15	1	0	1
1:54450490:A:G	rs638749	1	54450490	G	A	0.4824	3.29957e-05	-0.67284	0.160618	0.107678	rs954878	1	HNRNPA3P12	8785	intergenic	4.564	5	5	15	1	1	1
4:67298587:G:T	rs17729362	4	67298587	G	T	0.04093	3.33844e-05	-1.84561	0.440866	0.230787	rs67668930	7	RPS23P3	1347	intergenic	2.043	7	9	15	1	0	1
2:118921178:A:G	rs10170054	2	118921178	G	A	0.07967	3.36861e-05	-1.20979	0.289132	0.247439	rs2422177	4	AC093901.1	0	ncRNA_intronic	1.865	6	5	15	1	0	1
4:67279470:A:G	rs142502728	4	67279470	G	A	0.04113	3.37952e-05	-1.84482	0.440981	0.232796	rs67668930	7	RPS23P3	17339	intergenic	2.888	7	9	15	1	0	1
4:67250100:A:C	rs72643112	4	67250100	C	A	0.04133	3.37974e-05	-1.84476	0.440969	0.234809	rs67668930	7	RPS23P3	46709	intergenic	1.701	6	9	15	1	0	1
4:67256081:G:T	rs10517979	4	67256081	G	T	0.04153	3.37974e-05	-1.84476	0.440969	0.2333	rs67668930	7	RPS23P3	40728	intergenic	0.435	6	9	15	1	0	1
4:67257646:A:G	rs17784894	4	67257646	A	G	0.04133	3.37974e-05	-1.84476	0.440969	0.234809	rs67668930	7	RPS23P3	39163	intergenic	5.468	7	9	15	1	0	1
4:67269625:A:G	rs6852720	4	67269625	G	A	0.04133	3.37974e-05	-1.84476	0.440969	0.234809	rs67668930	7	RPS23P3	27184	intergenic	2.805	5	9	15	1	0	1
4:67279788:A:G	rs115579433	4	67279788	A	G	0.04113	3.37974e-05	-1.84476	0.440969	0.232796	rs67668930	7	RPS23P3	17021	intergenic	2.914	5	9	15	1	0	1
4:67276119:G:T	rs72643139	4	67276119	G	T	0.04113	3.37994e-05	-1.84481	0.44098	0.232796	rs67668930	7	RPS23P3	20690	intergenic	0.466	7	15	15	1	0	1
4:67261482:A:AT	rs11340447	4	67261482	AT	A	0.04213	3.3801e-05	-1.84994	0.442208	0.232324	rs67668930	7	RPS23P3	35327	intergenic	0.445	NA	15	15	1	0	1
4:67247296:C:T	rs6823582	4	67247296	C	T	0.04133	3.38039e-05	-1.84475	0.44097	0.234809	rs67668930	7	RPS23P3	49513	intergenic	0.086	6	15	15	1	0	1
4:67289537:A:G	rs72643158	4	67289537	G	A	0.04093	3.38224e-05	-1.84424	0.44086	0.230787	rs67668930	7	RPS23P3	7272	intergenic	1.993	7	9	15	1	0	1
4:67292846:A:G	rs72643166	4	67292846	A	G	0.04093	3.38244e-05	-1.84428	0.440872	0.230787	rs67668930	7	RPS23P3	3963	intergenic	8.143	6	15	15	1	0	1
2:118948590:C:T	rs10165103	2	118948590	C	T	0.1356	3.40342e-05	-1.25585	0.300313	0.658618	rs2422177	4	AC093901.1	4627	intergenic	3.506	7	5	14	1	0	1
4:67125931:C:T	rs13108683	4	67125931	C	T	0.03854	3.44538e-05	-1.7975	0.430135	0.159244	rs67668930	7	MIR1269A	16610	intergenic	1.219	7	9	15	1	0	1
2:118911254:A:C	rs72839650	2	118911254	A	C	0.08646	3.60777e-05	-1.30323	0.312669	0.168832	rs2422177	4	AC093901.1	0	ncRNA_intronic	2.051	7	5	15	1	0	1
1:160350140:G:T	rs11265382	1	160350140	T	G	0.07728	3.62838e-05	-0.995419	0.238897	0.703554	rs77847479	2	NHLH1	7501	intergenic	0.136	6	13	15	1	1	1
7:9427390:A:G	rs78707688	7	9427390	A	G	0.03994	3.6941e-05	-1.42617	0.342625	0.561503	rs77755643	10	AC079756.1	206856	intergenic	1.225	7	9	9	0	0	1
12:41406870:A:G	rs189932168	12	41406870	G	A	0.01657	3.93349e-05	-2.86528	0.690822	0.229408	rs147468045	16	CNTN1	0	intronic	0.009	7	5	15	1	0	1
4:67300481:C:T	rs114525915	4	67300481	T	C	0.05112	3.98162e-05	-1.7967	0.433486	0.292429	rs67668930	7	RPS23P3	3241	intergenic	3.651	6	9	15	1	0	1
4:67299671:A:G	rs180827136	4	67299671	G	A	0.05172	4.17018e-05	-1.76241	0.426343	0.226889	rs67668930	7	RPS23P3	2431	intergenic	1.591	7	9	15	1	0	1
4:67299100:C:T	rs111281713	4	67299100	T	C	0.05192	4.17048e-05	-1.76232	0.426322	0.225685	rs67668930	7	RPS23P3	1860	intergenic	1.964	7	9	15	1	0	1
4:67299300:C:T	rs72643171	4	67299300	T	C	0.05172	4.17048e-05	-1.76232	0.426322	0.226889	rs67668930	7	RPS23P3	2060	intergenic	3.272	7	9	15	1	0	1
4:67298226:A:C	rs72643169	4	67298226	C	A	0.05192	4.17363e-05	-1.76224	0.426322	0.228812	rs67668930	7	RPS23P3	986	downstream	5.551	7	9	15	1	0	1
4:67296474:A:C	rs56257983	4	67296474	A	C	0.05192	4.17575e-05	-1.76292	0.4265	0.228812	rs67668930	7	RPS23P3	335	upstream	1.166	5	7	15	1	0	1
4:67298787:C:T	rs72643170	4	67298787	C	T	0.05172	4.17958e-05	-1.76207	0.426315	0.226889	rs67668930	7	RPS23P3	1547	intergenic	1.337	7	9	15	1	0	1
4:67335351:A:G	rs7654127	4	67335351	G	A	0.09764	4.19072e-05	-1.64299	0.397565	0.176796	rs67668930	7	RPS23P3	38111	intergenic	1.341	7	15	15	1	0	1
12:41276858:A:C	rs138056985	12	41276858	A	C	0.01518	4.19081e-05	-2.89273	0.699975	0.234899	rs147468045	16	CNTN1	0	intronic	8.195	5	5	15	1	0	1
4:67288042:A:G	rs55677631	4	67288042	G	A	0.05212	4.22226e-05	-1.76114	0.426339	0.230739	rs67668930	7	RPS23P3	8767	intergenic	2.157	7	9	15	1	0	1
4:67288490:A:C	rs72643155	4	67288490	A	C	0.05192	4.22265e-05	-1.76104	0.426317	0.228812	rs67668930	7	RPS23P3	8319	intergenic	0.56	7	9	15	1	0	1
4:67288967:A:C	rs72643157	4	67288967	C	A	0.05192	4.22265e-05	-1.76104	0.426317	0.228812	rs67668930	7	RPS23P3	7842	intergenic	0.183	7	9	15	1	0	1
4:67289810:A:T	rs72643161	4	67289810	T	A	0.05192	4.22265e-05	-1.76104	0.426317	0.228812	rs67668930	7	RPS23P3	6999	intergenic	2.249	6	9	15	1	0	1
4:67292672:A:T	rs72643165	4	67292672	T	A	0.05192	4.22265e-05	-1.76104	0.426317	0.228812	rs67668930	7	RPS23P3	4137	intergenic	2.04	7	15	15	1	0	1
4:67294935:A:AT	rs149238806	4	67294935	AT	A	0.05192	4.22265e-05	-1.76104	0.426317	0.228812	rs67668930	7	RPS23P3	1874	intergenic	0.971	NA	9	15	1	0	1
4:67294941:A:G	rs116808105	4	67294941	G	A	0.05192	4.22265e-05	-1.76104	0.426317	0.228812	rs67668930	7	RPS23P3	1868	intergenic	1.299	7	9	15	1	0	1
4:67295208:A:T	rs17785566	4	67295208	T	A	0.05212	4.22265e-05	-1.76104	0.426317	0.227604	rs67668930	7	RPS23P3	1601	intergenic	4.191	5	9	15	1	0	1
4:67295466:C:T	rs17729112	4	67295466	T	C	0.05192	4.22265e-05	-1.76104	0.426317	0.228812	rs67668930	7	RPS23P3	1343	intergenic	0.625	6	9	15	1	0	1
4:67286584:C:T	rs17728992	4	67286584	T	C	0.05252	4.22585e-05	-1.76061	0.426231	0.225213	rs67668930	7	RPS23P3	10225	intergenic	0.292	6	9	15	1	0	1
4:67300165:C:T	rs72643173	4	67300165	C	T	0.05152	4.28355e-05	-1.75423	0.425019	0.223166	rs67668930	7	RPS23P3	2925	intergenic	1.672	7	9	15	1	0	1
4:67300198:A:C	rs72643174	4	67300198	A	C	0.05152	4.28355e-05	-1.75423	0.425019	0.22497	rs67668930	7	RPS23P3	2958	intergenic	3.849	6	9	15	1	0	1
4:67325323:C:T	rs72890785	4	67325323	C	T	0.09884	4.30297e-05	-1.64048	0.397562	0.177473	rs67668930	7	RPS23P3	28083	intergenic	1.655	6	9	15	1	0	1
4:67332720:C:T	rs72902549	4	67332720	T	C	0.09884	4.37112e-05	-1.63848	0.397439	0.176246	rs67668930	7	RPS23P3	35480	intergenic	0.249	7	9	15	1	0	1
7:9469094:A:G	rs574736145	7	9469094	A	G	0.02596	4.395e-05	-1.49082	0.361735	0.836374	rs77755643	10	AC079756.1	165152	intergenic	0.323	NA	9	15	0	0	0
4:67240566:A:G	rs17087106	4	67240566	G	A	0.05871	4.39656e-05	-1.73494	0.420977	0.244261	rs67668930	7	RPS23P3	56243	intergenic	1.245	7	15	15	0	0	1
2:118930311:C:T	rs4088767	2	118930311	C	T	0.102	4.58156e-05	-1.30762	0.318047	0.415939	rs2422177	4	AC093901.1	0	ncRNA_intronic	3.399	7	5	15	1	0	1
4:116066812:A:G	rs11728794	4	116066812	A	G	0.2087	4.59716e-05	-0.927742	0.225696	0.824374	rs59230330	8	MRPS33P3	2352	intergenic	5.385	5	7	15	1	0	1
7:9496202:A:G	rs148033184	7	9496202	G	A	0.02476	4.69371e-05	-1.48064	0.360636	0.8156	rs77755643	10	AC079756.1	138044	intergenic	0.026	7	9	15	0	0	1
7:9497705:A:T	rs181952236	7	9497705	A	T	0.02476	4.7064e-05	-1.48041	0.360637	0.8156	rs77755643	10	AC079756.1	136541	intergenic	7.317	7	9	15	0	0	1
7:9500706:A:G	rs147656639	7	9500706	G	A	0.02476	4.70726e-05	-1.48039	0.360636	0.8156	rs77755643	10	AC079756.1	133540	intergenic	1.453	6	9	15	0	0	1
7:9499551:A:G	rs118119312	7	9499551	A	G	0.02476	4.7088e-05	-1.48039	0.360643	0.8156	rs77755643	10	AC079756.1	134695	intergenic	1.674	7	9	15	0	0	1
1:173266444:C:T	rs10798267	1	173266444	C	T	0.1014	4.75762e-05	-1.11342	0.271407	0.451016	rs72724954	3	snoU13	16134	intergenic	1.017	5	2	15	1	0	1
7:9482443:A:G	rs76275152	7	9482443	A	G	0.02596	4.7659e-05	-1.48283	0.361492	0.836374	rs77755643	10	AC079756.1	151803	intergenic	2.678	6	9	15	0	0	1
1:173265908:C:T	rs4916318	1	173265908	T	C	0.1002	4.77634e-05	-1.1133	0.271439	0.436357	rs72724954	3	snoU13	15598	intergenic	1.358	7	2	15	1	0	1
4:67296678:A:G	rs17087161	4	67296678	G	A	0.1865	4.79277e-05	-1.58409	0.386304	0.262722	rs67668930	7	RPS23P3	131	upstream	1.697	4	7	15	1	0	1
7:9494917:C:T	rs77374763	7	9494917	T	C	0.02356	4.79464e-05	-1.47915	0.360721	0.855849	rs77755643	10	AC079756.1	139329	intergenic	2.169	7	7	15	0	0	1
7:9453991:C:T	rs79057106	7	9453991	C	T	0.02696	4.79905e-05	-1.47927	0.360768	0.806056	rs77755643	10	AC079756.1	180255	intergenic	0.5	6	9	15	0	0	0
7:9449092:C:G	rs55718633	7	9449092	C	G	0.02676	4.80104e-05	-1.47926	0.360774	0.811951	rs77755643	10	AC079756.1	185154	intergenic	0.544	6	5	15	0	0	0
7:9451762:C:T	rs75868948	7	9451762	C	T	0.02556	4.80173e-05	-1.47924	0.360774	0.849116	rs77755643	10	AC079756.1	182484	intergenic	0.328	7	5	15	0	0	0
7:9454130:G:T	rs75447467	7	9454130	G	T	0.02696	4.80173e-05	-1.47924	0.360774	0.806056	rs77755643	10	AC079756.1	180116	intergenic	1.298	7	9	15	0	0	0
7:9483061:C:T	rs117237466	7	9483061	C	T	0.02596	4.8032e-05	-1.47882	0.360676	0.836374	rs77755643	10	AC079756.1	151185	intergenic	0.393	6	7	15	0	0	1
7:9488581:A:T	rs80356347	7	9488581	T	A	0.02596	4.80515e-05	-1.47886	0.360695	0.836374	rs77755643	10	AC079756.1	145665	intergenic	1.934	7	7	15	0	0	1
7:9461658:C:G	rs78796547	7	9461658	C	G	0.02576	4.81802e-05	-1.47882	0.360743	0.842699	rs77755643	10	AC079756.1	172588	intergenic	3.21	7	9	15	0	0	0
7:9465446:A:T	rs76512513	7	9465446	T	A	0.02596	4.81802e-05	-1.47882	0.360743	0.836374	rs77755643	10	AC079756.1	168800	intergenic	3.792	7	9	15	0	0	0
7:9474521:G:T	rs77835140	7	9474521	T	G	0.02456	4.81864e-05	-1.47886	0.360754	0.882649	rs77755643	10	AC079756.1	159725	intergenic	16.03	6	9	15	0	0	0
7:9466370:A:G	rs77390808	7	9466370	G	A	0.02596	4.82093e-05	-1.47863	0.360709	0.836374	rs77755643	10	AC079756.1	167876	intergenic	4.699	7	9	15	0	0	0
7:9457999:A:G	rs117106570	7	9457999	A	G	0.02576	4.82289e-05	-1.47903	0.360814	0.842699	rs77755643	10	AC079756.1	176247	intergenic	8.077	6	9	15	0	0	0
7:9460347:C:G	rs75247984	7	9460347	C	G	0.02636	4.82346e-05	-1.47882	0.360765	0.82399	rs77755643	10	AC079756.1	173899	intergenic	0.061	7	9	15	0	0	0
7:9447433:A:C	rs80151190	7	9447433	A	C	0.02556	4.83939e-05	-1.4789	0.360854	0.849116	rs77755643	10	AC079756.1	186813	intergenic	2.655	6	7	15	0	0	0
7:9447944:C:T	rs56048294	7	9447944	T	C	0.02556	4.83939e-05	-1.4789	0.360854	0.849116	rs77755643	10	AC079756.1	186302	intergenic	8.259	7	7	15	0	0	0
7:9448232:A:C	rs74921508	7	9448232	C	A	0.02556	4.83939e-05	-1.4789	0.360854	0.849116	rs77755643	10	AC079756.1	186014	intergenic	0.322	7	7	15	0	0	0
7:9446511:C:G	rs79529201	7	9446511	C	G	0.02556	4.8421e-05	-1.47887	0.36086	0.849116	rs77755643	10	AC079756.1	187735	intergenic	5.883	7	9	15	0	0	0
7:9447793:C:G	rs55851301	7	9447793	G	C	0.02556	4.86333e-05	-1.47863	0.360893	0.849116	rs77755643	10	AC079756.1	186453	intergenic	1.482	5	7	15	0	0	0
7:9484859:C:T	rs74666362	7	9484859	T	C	0.02596	4.88305e-05	-1.47815	0.360861	0.836374	rs77755643	10	AC079756.1	149387	intergenic	2.18	7	9	15	0	0	1
7:9488066:C:CTGAGT	rs141558646	7	9488066	CTGAGT	C	0.02596	4.88579e-05	-1.47813	0.360868	0.836374	rs77755643	10	AC079756.1	146180	intergenic	5.784	NA	7	15	0	0	1
7:9473865:A:G	rs117937350	7	9473865	A	G	0.02456	4.91879e-05	-1.47881	0.361176	0.882649	rs77755643	10	AC079756.1	160381	intergenic	1.256	5	9	15	0	0	0
7:9459690:C:G	rs77333046	7	9459690	C	G	0.02576	4.92223e-05	-1.47798	0.360988	0.842699	rs77755643	10	AC079756.1	174556	intergenic	0.059	7	9	15	0	0	0
7:9484677:T:TA	rs202158520	7	9484677	T	TA	0.02616	4.92716e-05	-1.48416	0.362519	0.830138	rs77755643	10	AC079756.1	149569	intergenic	0.156	NA	9	15	0	0	1
4:67272022:C:T	rs55770221	4	67272022	T	C	0.04772	5.03349e-05	-1.7784	0.434931	0.210522	rs67668930	7	RPS23P3	24787	intergenic	1.103	7	9	15	1	0	1
14:50861953:A:G	rs11157742	14	50861953	G	A	0.1979	5.12775e-05	-0.822919	0.201475	0.22109	rs12896268	19	CDKL1	0	intronic	4.157	NA	1	5	1	1	1
1:54463804:T:TA	rs71063894	1	54463804	T	TA	0.3952	5.19265e-05	-0.652603	0.159895	0.278145	rs954878	1	LDLRAD1	10607	intergenic	3.255	NA	9	15	1	0	1
6:110775551:A:G	rs76425255	6	110775551	G	A	0.0603	5.21453e-05	-1.59652	0.391261	0.947085	rs221720	9	SLC22A16	0	intronic	0.354	7	4	15	1	1	1
4:67323330:A:G	rs56659951	4	67323330	G	A	0.09864	5.40438e-05	-1.62617	0.399369	0.176744	rs67668930	7	RPS23P3	26090	intergenic	1.661	7	9	15	1	0	1
7:108093225:A:G	rs117091136	7	108093225	G	A	0.01897	5.4673e-05	-2.40282	0.590511	0.941851	rs141901173	11	NRCAM	0	intronic	1.428	4	1	14	1	1	1
17:10082141:A:G	rs11651332	17	10082141	G	A	0.125	5.49085e-05	-1.05734	0.259914	0.803377	rs8081398	20	GAS7	0	intronic	3.695	7	5	15	1	0	1
4:67298512:G:T	rs17785798	4	67298512	G	T	0.04692	5.5828e-05	-1.77507	0.436775	0.209158	rs67668930	7	RPS23P3	1272	intergenic	2.633	6	9	15	1	0	1
3:14379479:C:T	rs900179	3	14379479	C	T	0.2019	5.61118e-05	0.734399	0.180761	0.270114	rs13091718	5	RP11-536I6.1	10471	intergenic	0.886	5	5	15	1	0	1
4:67283978:A:C	rs143927918	4	67283978	A	C	0.04692	5.65032e-05	-1.7742	0.436874	0.209158	rs67668930	7	RPS23P3	12831	intergenic	1.896	7	9	15	1	0	1
4:67293146:A:C	rs72643167	4	67293146	C	A	0.04732	5.65319e-05	-1.77378	0.436782	0.206726	rs67668930	7	RPS23P3	3663	intergenic	0.959	7	15	15	1	0	1
4:67286249:C:T	rs72643154	4	67286249	T	C	0.04692	5.65326e-05	-1.77372	0.43677	0.209158	rs67668930	7	RPS23P3	10560	intergenic	5.531	6	9	15	1	0	1
4:67288797:A:C	rs55771742	4	67288797	C	A	0.04692	5.65326e-05	-1.77372	0.43677	0.209158	rs67668930	7	RPS23P3	8012	intergenic	6.575	7	9	15	1	0	1
4:67289642:C:G	rs72643159	4	67289642	C	G	0.04692	5.65326e-05	-1.77372	0.43677	0.209158	rs67668930	7	RPS23P3	7167	intergenic	4.314	6	9	15	1	0	1
4:67289707:A:G	rs72643160	4	67289707	A	G	0.04692	5.65326e-05	-1.77372	0.43677	0.209158	rs67668930	7	RPS23P3	7102	intergenic	10.17	7	9	15	1	0	1
4:67294724:A:T	rs72643168	4	67294724	T	A	0.04692	5.65326e-05	-1.77372	0.43677	0.209158	rs67668930	7	RPS23P3	2085	intergenic	7.718	7	9	15	1	0	1
4:67295956:C:T	rs1512959	4	67295956	C	T	0.04692	5.65326e-05	-1.77372	0.43677	0.209158	rs67668930	7	RPS23P3	853	upstream	2.674	NA	9	15	1	0	1
14:50855280:C:T	rs12895100	14	50855280	T	C	0.4712	5.74592e-05	-0.655231	0.161503	0.707656	rs12896268	19	CDKL1	0	intronic	1.918	4	2	15	1	0	1
7:9503002:G:T	rs143406997	7	9503002	T	G	0.02496	5.76545e-05	-1.47583	0.36384	0.794647	rs77755643	10	AC079756.1	131244	intergenic	3.717	5	9	15	0	0	1
7:9503213:A:G	rs145357018	7	9503213	A	G	0.02476	5.76545e-05	-1.47583	0.36384	0.800899	rs77755643	10	AC079756.1	131033	intergenic	3.864	6	9	15	0	0	1
7:9504274:A:G	rs56200005	7	9504274	A	G	0.02476	5.76545e-05	-1.47583	0.36384	0.800899	rs77755643	10	AC079756.1	129972	intergenic	0.781	6	9	15	0	0	1
7:9506417:C:T	rs56284099	7	9506417	C	T	0.02676	5.76604e-05	-1.47523	0.363693	0.742293	rs77755643	10	AC079756.1	127829	intergenic	0.259	6	9	15	0	0	1
7:9504243:A:C	rs55655463	7	9504243	C	A	0.02476	5.76734e-05	-1.47583	0.363847	0.800899	rs77755643	10	AC079756.1	130003	intergenic	0.311	7	9	15	0	0	1
4:116112076:G:GT	rs34764049	4	116112076	G	GT	0.2039	5.82591e-05	-0.890026	0.219556	0.800957	rs59230330	8	MRPS33P3	47616	intergenic	1.044	NA	9	15	1	0	1
7:9505273:C:T	rs76099470	7	9505273	T	C	0.02476	5.83005e-05	-1.47418	0.363674	0.800899	rs77755643	10	AC079756.1	128973	intergenic	2.779	7	9	15	0	0	1
7:9505274:A:G	rs75684830	7	9505274	G	A	0.02476	5.83005e-05	-1.47418	0.363674	0.800899	rs77755643	10	AC079756.1	128972	intergenic	0.428	7	9	15	0	0	1
7:9506116:C:T	rs74611213	7	9506116	T	C	0.02476	5.83141e-05	-1.47416	0.363674	0.800899	rs77755643	10	AC079756.1	128130	intergenic	0.788	6	9	15	0	0	1
7:9506447:C:G	rs56191807	7	9506447	G	C	0.02476	5.8726e-05	-1.47381	0.363739	0.800899	rs77755643	10	AC079756.1	127799	intergenic	0.16	6	9	15	0	0	1
7:9531413:A:C	rs73050305	7	9531413	C	A	0.02316	5.96741e-05	-1.52527	0.376801	0.604415	rs77755643	10	AC079756.1	102833	intergenic	0.12	6	9	15	0	0	1
7:9511800:A:G	rs118066924	7	9511800	A	G	0.02476	6.06785e-05	-1.46963	0.363417	0.800899	rs77755643	10	AC079756.1	122446	intergenic	3.158	6	9	15	0	0	1
7:9512319:A:G	rs74808891	7	9512319	A	G	0.02476	6.06785e-05	-1.46963	0.363417	0.800899	rs77755643	10	AC079756.1	121927	intergenic	0.518	6	9	15	0	0	1
7:9512439:A:G	rs75657939	7	9512439	A	G	0.02476	6.06785e-05	-1.46963	0.363417	0.800899	rs77755643	10	AC079756.1	121807	intergenic	0.651	6	9	15	0	0	1
7:9512454:C:T	rs116939045	7	9512454	T	C	0.02476	6.07554e-05	-1.46948	0.363407	0.800899	rs77755643	10	AC079756.1	121792	intergenic	2.035	6	9	15	0	0	1
4:67287728:C:T	rs6838213	4	67287728	T	C	0.1809	6.09449e-05	-1.57749	0.390193	0.247999	rs67668930	7	RPS23P3	9081	intergenic	0.278	5	9	15	1	0	1
7:9519085:C:T	rs77492294	7	9519085	C	T	0.02496	6.12808e-05	-1.46843	0.363336	0.794647	rs77755643	10	AC079756.1	115161	intergenic	0.164	7	9	15	0	0	1
7:9520731:C:T	rs75747166	7	9520731	C	T	0.02516	6.12808e-05	-1.46843	0.363336	0.788488	rs77755643	10	AC079756.1	113515	intergenic	9.004	7	9	15	0	0	1
7:9524809:C:T	rs139679062	7	9524809	C	T	0.02496	6.12808e-05	-1.46843	0.363336	0.794647	rs77755643	10	AC079756.1	109437	intergenic	1.621	6	9	15	0	0	1
7:9530283:A:G	rs56182904	7	9530283	A	G	0.03435	6.16207e-05	-1.41214	0.349523	0.582324	rs77755643	10	AC079756.1	103963	intergenic	2.829	7	5	15	0	0	1
7:9529727:A:AG	rs55660629	7	9529727	AG	A	0.02516	6.30326e-05	-1.4649	0.363074	0.788488	rs77755643	10	AC079756.1	104519	intergenic	2.704	NA	5	15	0	0	1
7:9528214:A:G	rs75483896	7	9528214	A	G	0.02516	6.30333e-05	-1.46473	0.363033	0.788488	rs77755643	10	AC079756.1	106032	intergenic	11.6	4	7	15	0	0	1
7:9528723:G:T	rs80102879	7	9528723	T	G	0.02516	6.30333e-05	-1.46473	0.363033	0.788488	rs77755643	10	AC079756.1	105523	intergenic	1.778	7	7	15	0	0	1
7:9494164:A:G	rs58544160	7	9494164	A	G	0.08167	6.36876e-05	-1.32173	0.327794	0.207159	rs77755643	10	AC079756.1	140082	intergenic	10.11	6	5	15	0	0	1
7:9494238:G:T	rs11976531	7	9494238	T	G	0.08167	6.37322e-05	-1.32168	0.327795	0.207159	rs77755643	10	AC079756.1	140008	intergenic	13.98	6	7	15	0	0	1
4:67269940:A:G	rs72643131	4	67269940	A	G	0.03275	6.4267e-05	-1.80286	0.44736	0.300558	rs67668930	7	RPS23P3	26869	intergenic	3.099	5	9	15	1	0	1
4:67206455:A:G	rs13140521	4	67206455	G	A	0.02037	6.45077e-05	-1.80944	0.449095	0.200226	rs67668930	7	MIR1269A	63808	intergenic	0.357	6	9	15	0	0	1
4:67229912:C:G	rs67788758	4	67229912	G	C	0.02057	6.46514e-05	-1.8077	0.448723	0.185152	rs67668930	7	RPS23P3	66897	intergenic	0.957	NA	9	15	0	0	1
4:67212868:G:T	rs66718646	4	67212868	G	T	0.02037	6.49812e-05	-1.80624	0.448498	0.200226	rs67668930	7	MIR1269A	70221	intergenic	0.8	7	9	15	0	0	1
6:110772775:A:G	rs75407366	6	110772775	G	A	0.0605	6.75931e-05	-1.58904	0.395506	0.943918	rs221720	9	SLC22A16	0	intronic	0.629	7	4	15	1	0	1
6:110772415:C:T	rs74765538	6	110772415	T	C	0.0605	6.763e-05	-1.58905	0.39552	0.943918	rs221720	9	SLC22A16	0	intronic	0.136	5	4	15	1	0	1
7:9516016:A:G	rs76432510	7	9516016	A	G	0.05871	6.76524e-05	-1.30772	0.325502	0.327501	rs77755643	10	AC079756.1	118230	intergenic	8.342	7	7	15	0	0	1
4:67285776:A:G	rs72643153	4	67285776	G	A	0.02017	6.8212e-05	-1.82234	0.453822	0.184628	rs67668930	7	RPS23P3	11033	intergenic	3.236	6	15	15	1	0	1
4:67291132:C:T	rs72643162	4	67291132	T	C	0.02017	6.8212e-05	-1.82234	0.453822	0.184628	rs67668930	7	RPS23P3	5677	intergenic	1.696	7	9	15	1	0	1
12:41300994:A:G	rs117199739	12	41300994	A	G	0.01518	6.94191e-05	-2.93621	0.731992	0.241274	rs147468045	16	CNTN1	0	intronic	1.407	4	2	15	1	0	1
6:110761342:C:T	rs221713	6	110761342	C	T	0.0605	7.01516e-05	-1.58368	0.395061	0.943918	rs221720	9	SLC22A16:RN7SL617P	00:00:00	ncRNA_exonic	2.611	NA	5	15	1	1	1
3:14378320:C:T	rs2086566	3	14378320	T	C	0.3413	7.17297e-05	0.655591	0.163764	0.136902	rs13091718	5	RP11-536I6.1	11630	intergenic	1.469	5	5	15	1	0	1
7:9490654:A:G	rs12112527	7	9490654	G	A	0.08227	7.40251e-05	-1.31451	0.32899	0.203615	rs77755643	10	AC079756.1	143592	intergenic	2.168	7	5	15	0	0	1
4:67300277:C:T	rs72643178	4	67300277	C	T	0.04792	7.45055e-05	-1.72543	0.432004	0.209312	rs67668930	7	RPS23P3	3037	intergenic	2.054	6	9	15	1	0	1
1:173266512:A:G	rs74371917	1	173266512	A	G	0.07568	7.45431e-05	-1.10879	0.277621	0.633715	rs72724954	3	snoU13	16202	intergenic	5.468	5	2	15	1	1	1
2:118940911:A:G	rs2306733	2	118940911	A	G	0.1605	7.48788e-05	-1.16293	0.291259	0.58817	rs2422177	4	AC093901.1	0	ncRNA_intronic	15.45	NA	5	15	1	0	1
13:54922005:C:T	rs35387980	13	54922005	C	T	0.04073	7.75475e-05	-1.19936	0.301028	0.226629	rs11619037	18	RPL13AP25	92833	intergenic	2.078	6	5	15	0	0	1
7:9491722:T:TAGA	rs142101391	7	9491722	T	TAGA	0.08407	7.81627e-05	-1.31305	0.329722	0.200047	rs77755643	10	AC079756.1	142524	intergenic	4.145	NA	5	15	0	0	1
4:67214887:A:C	rs55901417	4	67214887	C	A	0.02436	7.82276e-05	-1.72139	0.432285	0.181371	rs67668930	7	MIR1269A	72240	intergenic	0.061	6	9	15	0	0	1
4:14278844:C:T	rs77885802	4	14278844	T	C	0.1296	7.98545e-05	0.887734	0.223215	0.237419	rs1968315	6	RP11-669M16.1	34406	intergenic	4.951	6	5	15	1	0	1
14:50857478:A:C	rs1538903	14	50857478	C	A	0.1967	8.0668e-05	-0.736769	0.185372	0.274323	rs12896268	19	CDKL1	0	intronic	3.642	4	4	15	1	1	1
1:173261188:C:T	rs61828278	1	173261188	C	T	0.06869	8.46225e-05	-1.10786	0.279565	0.66739	rs72724954	3	snoU13	10878	intergenic	1.494	7	5	15	1	0	1
4:14280282:A:G	rs16890027	4	14280282	G	A	0.1328	8.6324e-05	0.882746	0.223035	0.221714	rs1968315	6	RP11-669M16.1	35844	intergenic	0.8	6	5	15	1	0	1
1:173265995:A:C	rs12118748	1	173265995	A	C	0.06889	8.68709e-05	-1.10391	0.279024	0.670098	rs72724954	3	snoU13	15685	intergenic	4.355	5	2	15	1	0	1
1:173262051:C:T	rs12145087	1	173262051	T	C	0.06969	8.71161e-05	-1.10408	0.279115	0.681762	rs72724954	3	snoU13	11741	intergenic	3.787	7	5	15	1	0	1
13:54828984:A:G	rs1413878	13	54828984	A	G	0.149	8.81331e-05	-1.16343	0.294333	0.104946	rs11619037	18	LINC00458	121982	intergenic	4.225	6	5	15	0	0	1
4:67241574:C:T	rs17087111	4	67241574	T	C	0.1324	9.16311e-05	-1.61008	0.408323	0.269826	rs67668930	7	RPS23P3	55235	intergenic	1.761	6	7	15	0	0	1
1:173257998:T:TCTC	rs77046629	1	173257998	TCTC	T	0.06709	9.32317e-05	-1.0947	0.277922	0.636282	rs72724954	3	snoU13	7688	intergenic	2.72	NA	9	15	1	0	1
4:67246078:A:C	rs112925361	4	67246078	A	C	0.1324	9.35592e-05	-1.60946	0.408697	0.269826	rs67668930	7	RPS23P3	50731	intergenic	1.508	7	9	15	0	0	1
4:67254437:A:G	rs72643116	4	67254437	G	A	0.1324	9.56134e-05	-1.60579	0.408323	0.267827	rs67668930	7	RPS23P3	42372	intergenic	0.912	7	9	15	1	0	1
23:81255761:A:ATG	rs34633031	23	81255761	ATG	A	0.09385	9.58415e-05	0.656313	0.166913	0.797846	rs73241354	22	RNU6-974P	907	downstream	7.106	NA	9	15	1	0	1
17:10046883:C:T	rs7210889	17	10046883	T	C	0.2698	9.61196e-05	-0.668259	0.169983	0.110241	rs12935988	20	GAS7	0	intronic	5.203	4	5	15	1	0	1
4:67301594:A:G	rs1877517	4	67301594	G	A	0.06749	9.65033e-05	-1.58274	0.402697	0.176856	rs67668930	7	RPS23P3	4354	intergenic	0.054	NA	9	15	1	0	1
4:67259015:A:G	rs72643118	4	67259015	A	G	0.132	9.65411e-05	-1.60479	0.408318	0.269543	rs67668930	7	RPS23P3	37794	intergenic	2.415	7	9	15	1	0	1
4:67124155:A:G	rs67483127	4	67124155	G	A	0.0655	9.65445e-05	-1.54059	0.391982	0.332823	rs67668930	7	MIR1269A	18386	intergenic	0.631	6	9	15	1	0	1
4:67253757:C:T	rs6552006	4	67253757	T	C	0.1324	9.72408e-05	-1.60373	0.408234	0.267827	rs67668930	7	RPS23P3	43052	intergenic	3.372	7	15	15	1	0	1
4:116106172:A:G	rs11728285	4	116106172	A	G	0.2009	9.72456e-05	-0.865533	0.220324	0.821751	rs59230330	8	MRPS33P3	41712	intergenic	1.618	6	14	15	1	0	1
4:116106499:A:G	rs11736768	4	116106499	G	A	0.2043	9.73148e-05	-0.865495	0.220324	0.805402	rs59230330	8	MRPS33P3	42039	intergenic	2.14	7	7	15	1	0	1
4:116108582:C:T	rs12499289	4	116108582	C	T	0.2019	9.74715e-05	-0.865392	0.22032	0.816898	rs59230330	8	MRPS33P3	44122	intergenic	0.021	5	9	15	1	0	1
4:116108815:C:T	rs12499352	4	116108815	C	T	0.2043	9.76557e-05	-0.865285	0.22032	0.805402	rs59230330	8	MRPS33P3	44355	intergenic	1.808	5	9	15	1	0	1
4:116108207:C:T	rs72667390	4	116108207	T	C	0.2043	9.76686e-05	-0.865275	0.220319	0.805402	rs59230330	8	MRPS33P3	43747	intergenic	0.421	7	15	15	1	0	1
4:67247286:A:G	rs6848643	4	67247286	A	G	0.1324	9.86117e-05	-1.6045	0.408791	0.267827	rs67668930	7	RPS23P3	49523	intergenic	1.615	7	15	15	1	0	1
4:67249397:A:G	rs2221811	4	67249397	A	G	0.1322	9.89033e-05	-1.60419	0.408788	0.268311	rs67668930	7	RPS23P3	47412	intergenic	0.172	7	9	15	1	0	1
4:67249995:A:T	rs72643111	4	67249995	A	T	0.1322	9.89036e-05	-1.60415	0.408779	0.268311	rs67668930	7	RPS23P3	46814	intergenic	1.493	7	9	15	1	0	1
4:67250251:C:T	rs72643114	4	67250251	T	C	0.1328	9.89036e-05	-1.60415	0.408779	0.268115	rs67668930	7	RPS23P3	46558	intergenic	1.742	7	9	15	1	0	1
17:10082249:C:T	rs7503418	17	10082249	C	T	0.1895	9.91296e-05	-0.919403	0.234321	0.478462	rs8081398	20	GAS7	0	intronic	9.335	7	5	15	1	0	1
14:50855257:A:G	rs12894832	14	50855257	G	A	0.4722	9.95982e-05	-0.632495	0.161247	0.703601	rs12896268	19	CDKL1	0	intronic	2.031	4	2	15	1	0	1
4:116105196:A:G	rs17685799	4	116105196	G	A	0.2059	0.000102164	-0.862009	0.220113	0.797856	rs59230330	8	MRPS33P3	40736	intergenic	1.252	7	5	15	1	0	1
17:10077989:A:G	rs9902873	17	10077989	G	A	0.3612	0.000105513	-0.691461	0.176926	0.248861	rs8081398	20	GAS7	0	intronic	0.004	2b	5	15	1	0	1
17:10077977:C:T	rs9904498	17	10077977	C	T	0.361	0.000105515	-0.69155	0.176949	0.249053	rs8081398	20	GAS7	0	intronic	0.098	4	5	15	1	0	1
4:67300236:C:T	rs72643176	4	67300236	C	T	0.04653	0.00010577	-1.67663	0.429071	0.113258	rs67668930	7	RPS23P3	2996	intergenic	1.43	6	9	15	1	0	1
1:160348213:G:T	rs4263993	1	160348213	G	T	0.2061	0.000105821	-0.844821	0.216207	0.260589	rs77847479	2	NHLH1	5574	intergenic	2.015	7	5	15	1	1	1
4:116120053:C:CTGT	rs145580284	4	116120053	CTGT	C	0.1989	0.000106053	-0.86072	0.220307	0.825358	rs59230330	8	MRPS33P3	55593	intergenic	7.041	NA	9	15	0	0	1
4:116120093:A:G	rs61452687	4	116120093	A	G	0.2033	0.000106081	-0.860725	0.220312	0.804163	rs59230330	8	MRPS33P3	55633	intergenic	1.48	6	9	15	0	0	1
4:116122735:A:C	rs6857385	4	116122735	C	A	0.1999	0.000106152	-0.860655	0.220303	0.814389	rs59230330	8	MRPS33P3	58275	intergenic	1.29	7	9	15	0	0	1
4:116121385:C:G	rs12507538	4	116121385	C	G	0.2027	0.000106252	-0.86059	0.2203	0.80297	rs59230330	8	MRPS33P3	56925	intergenic	0.02	7	9	15	0	0	1
4:116117043:C:T	rs4833471	4	116117043	T	C	0.2005	0.000106516	-0.860506	0.220313	0.817659	rs59230330	8	MRPS33P3	52583	intergenic	0.129	6	9	15	0	0	1
4:116113665:C:T	rs2135968	4	116113665	C	T	0.2031	0.000106533	-0.860493	0.220312	0.805117	rs59230330	8	MRPS33P3	49205	intergenic	0.043	6	9	15	1	0	1
4:116113038:C:T	rs12647873	4	116113038	T	C	0.2035	0.000106682	-0.860388	0.220305	0.805151	rs59230330	8	MRPS33P3	48578	intergenic	1.493	6	9	15	1	0	1
3:14379665:A:G	rs900181	3	14379665	A	G	0.3812	0.000109197	0.647403	0.166016	0.172469	rs13091718	5	RP11-536I6.1	10285	intergenic	0.338	6	5	15	1	0	1
3:14382304:C:G	rs6442443	3	14382304	C	G	0.2398	0.000110534	0.703716	0.180598	0.306114	rs13091718	5	RP11-536I6.1	7646	intergenic	0.593	6	5	15	1	0	1
13:54882834:A:AAAT	rs149456100	13	54882834	AAAT	A	0.04113	0.000113259	-1.18265	0.303984	0.237632	rs11619037	18	RPL13AP25	132004	intergenic	2.224	NA	5	15	0	0	1
4:116182945:G:T	rs17685980	4	116182945	T	G	0.1993	0.000113924	-0.856572	0.220252	0.811443	rs59230330	8	MRPS33P3	118485	intergenic	0.515	7	7	15	0	0	1
4:116140026:T:TA	rs35513400	4	116140026	TA	T	0.2005	0.000114154	-0.858036	0.220657	0.813582	rs59230330	8	MRPS33P3	75566	intergenic	0.292	NA	1	15	0	0	1
4:116150544:A:T	rs11098288	4	116150544	T	A	0.2001	0.000115527	-0.855599	0.2202	0.809826	rs59230330	8	MRPS33P3	86084	intergenic	0.99	5	5	15	0	0	1
4:67244132:G:GA	rs146871532	4	67244132	GA	G	0.1208	0.000115772	-1.60214	0.412387	0.249399	rs67668930	7	RPS23P3	52677	intergenic	2.066	NA	15	15	0	0	1
4:116158676:C:T	rs72669529	4	116158676	C	T	0.1997	0.000115785	-0.855858	0.220298	0.8077	rs59230330	8	MRPS33P3	94216	intergenic	1.592	5	5	15	0	0	1
4:116145042:C:T	rs72669516	4	116145042	T	C	0.2001	0.000116176	-0.855439	0.220238	0.809826	rs59230330	8	MRPS33P3	80582	intergenic	4.996	6	5	15	0	0	1
2:118902597:A:G	rs4084827	2	118902597	A	G	0.1432	0.000116549	-1.11274	0.286541	0.409412	rs2422177	4	AC093901.1	0	ncRNA_intronic	3.248	NA	5	15	1	0	1
4:116163746:A:G	rs12640783	4	116163746	G	A	0.1995	0.00011734	-0.855073	0.220285	0.806722	rs59230330	8	MRPS33P3	99286	intergenic	3.87	7	5	15	0	0	1
8:40874461:A:C	rs72637737	8	40874461	C	A	0.02436	0.000119569	1.82224	0.470019	0.877954	rs72632937	12	RNU6-356P	15949	intergenic	0.087	7	5	15	1	0	1
4:116184391:G:T	rs72669560	4	116184391	T	G	0.1991	0.00012095	-0.852551	0.220066	0.812421	rs59230330	8	MRPS33P3	119931	intergenic	2.363	6	14	15	0	0	1
4:14270990:C:T	rs79232337	4	14270990	C	T	0.09026	0.000122424	1.1662	0.301262	0.579658	rs1968315	6	RP11-669M16.1	26552	intergenic	1.884	5	5	15	1	0	1
4:116104151:C:CTG	rs57020553	4	116104151	CTG	C	0.2037	0.000123732	-0.852482	0.220373	0.8102	rs59230330	8	MRPS33P3	39691	intergenic	1.782	NA	8	15	1	0	1
4:116102400:T:TA	rs140185690	4	116102400	TA	T	0.2037	0.000124012	-0.852343	0.220369	0.8102	rs59230330	8	MRPS33P3	37940	intergenic	2.667	NA	7	15	1	0	1
4:116178375:G:T	rs58533585	4	116178375	G	T	0.1991	0.000126388	-0.849775	0.219976	0.812421	rs59230330	8	MRPS33P3	113915	intergenic	4.417	7	9	15	0	0	1
4:116182700:A:C	rs17624048	4	116182700	C	A	0.1991	0.000128377	-0.849147	0.220037	0.812421	rs59230330	8	MRPS33P3	118240	intergenic	3.358	7	7	15	0	0	1
4:116121708:A:T	rs77686566	4	116121708	T	A	0.2061	0.000133374	-0.84715	0.220068	0.785791	rs59230330	8	MRPS33P3	57248	intergenic	0.618	5	9	15	0	0	1
4:116119710:A:G	rs11098285	4	116119710	G	A	0.2065	0.000133434	-0.847119	0.220067	0.787959	rs59230330	8	MRPS33P3	55250	intergenic	1.008	7	9	15	0	0	1
4:116117254:C:T	rs4833472	4	116117254	C	T	0.2065	0.000133618	-0.847064	0.220072	0.787959	rs59230330	8	MRPS33P3	52794	intergenic	1.04	6	9	15	0	0	1
4:116126380:C:T	rs6847838	4	116126380	C	T	0.2049	0.000133638	-0.847055	0.220072	0.793101	rs59230330	8	MRPS33P3	61920	intergenic	1.565	7	9	15	0	0	1
4:67120098:C:T	rs56209626	4	67120098	T	C	0.02776	0.000134025	-1.63763	0.42555	0.174371	rs67668930	7	MIR1269A	22443	intergenic	1.062	6	15	15	1	0	1
4:67119615:A:G	rs72641604	4	67119615	G	A	0.02776	0.000134442	-1.6371	0.4255	0.174371	rs67668930	7	MIR1269A	22926	intergenic	0.408	7	15	15	1	0	1
4:116188710:A:G	rs12501763	4	116188710	A	G	0.2023	0.000138087	-0.849554	0.221196	0.780391	rs59230330	8	MRPS33P3	124250	intergenic	3.168	7	15	15	0	0	1
4:67281106:C:T	rs72643149	4	67281106	C	T	0.02276	0.000139686	-1.66867	0.434797	0.169127	rs67668930	7	RPS23P3	15703	intergenic	0.099	7	9	15	1	0	1
7:108145867:C:T	rs149478769	7	108145867	C	T	0.01757	0.00014	-1.99318	0.519431	0.386231	rs141901173	11	PNPLA8	0	intronic	0.545	7	4	5	1	1	1
3:14378113:C:G	rs900178	3	14378113	G	C	0.3197	0.000142712	0.647087	0.168847	0.119436	rs13091718	5	RP11-536I6.1	11837	intergenic	0.27	2b	2	15	1	0	1
3:14377040:A:C	rs9828904	3	14377040	C	A	0.3173	0.000142805	0.647072	0.16885	0.121523	rs13091718	5	RP11-536I6.1	12910	intergenic	3.219	5	5	15	1	0	1
4:116167452:A:AC	rs78790065	4	116167452	AC	A	0.2101	0.000143385	-0.837456	0.218588	0.772566	rs59230330	8	MRPS33P3	102992	intergenic	0.572	NA	5	15	0	0	1
17:10049293:C:T	rs12952242	17	10049293	C	T	0.09685	0.000144472	-0.78107	0.203972	0.601704	rs12935988	20	GAS7:AC000003.2	00:00:00	exonic	5.328	7	5	15	1	0	1
7:108152904:C:T	rs138386507	7	108152904	T	C	0.01757	0.000145059	-1.98499	0.518509	0.386231	rs141901173	11	PNPLA8	0	intronic	5.907	7	4	5	1	1	1
7:108153941:G:T	rs77295210	7	108153941	T	G	0.01897	0.000145059	-1.98499	0.518509	0.361133	rs141901173	11	PNPLA8	0	intronic	0.359	7	4	5	1	1	1
7:108153080:A:T	rs80096843	7	108153080	T	A	0.01757	0.000145144	-1.98508	0.518551	0.386231	rs141901173	11	PNPLA8	0	intronic	7.62	6	4	5	1	1	1
7:108153092:C:G	rs150680690	7	108153092	G	C	0.01757	0.000145144	-1.98508	0.518551	0.386231	rs141901173	11	PNPLA8	0	intronic	1.669	6	4	5	1	1	1
7:108109901:A:C	rs140513805	7	108109901	C	A	0.01797	0.000145284	-1.98478	0.518508	0.3773	rs141901173	11	PNPLA8	964	downstream	3.343	6	5	5	1	1	1
7:108135773:A:C	rs147135994	7	108135773	A	C	0.01777	0.000145366	-1.98472	0.518512	0.373404	rs141901173	11	PNPLA8	0	intronic	7.477	6	4	5	1	1	1
7:108139445:C:T	rs115924334	7	108139445	C	T	0.01777	0.000145366	-1.98472	0.518512	0.381717	rs141901173	11	PNPLA8	0	intronic	0.189	6	4	5	1	1	1
7:108131089:A:G	rs192975823	7	108131089	G	A	0.01757	0.00014581	-1.98435	0.518518	0.386231	rs141901173	11	PNPLA8	0	intronic	0.088	7	4	5	1	1	1
7:108166822:C:G	rs138685541	7	108166822	C	G	0.01577	0.000146579	-1.98469	0.518788	0.299455	rs141901173	11	PNPLA8	0	intronic	6.352	4	1	1	1	1	1
7:108164408:C:T	rs74358476	7	108164408	C	T	0.01777	0.000146629	-1.98456	0.518768	0.381717	rs141901173	11	PNPLA8	0	intronic	0.252	7	1	7	1	1	1
7:108164632:C:T	rs74368973	7	108164632	C	T	0.01757	0.000146629	-1.98456	0.518768	0.386231	rs141901173	11	PNPLA8	0	intronic	1.079	5	1	7	1	1	1
7:108166989:C:G	rs144707062	7	108166989	C	G	0.01757	0.000146629	-1.98456	0.518768	0.386231	rs141901173	11	PNPLA8	0	intronic	4.901	4	1	1	1	1	1
7:108101701:C:T	rs75501617	7	108101701	T	C	0.02037	0.000146804	-1.98418	0.518708	0.630614	rs141901173	11	NRCAM	4539	intergenic	6.632	5	5	14	1	1	1
4:116096668:C:T	rs77123806	4	116096668	T	C	0.2175	0.000146949	-0.83798	0.219081	0.764934	rs59230330	8	MRPS33P3	32208	intergenic	3.181	7	15	15	1	0	1
7:108103057:A:G	rs151295711	7	108103057	A	G	0.01797	0.000146961	-1.9842	0.518749	0.3773	rs141901173	11	NRCAM	5895	intergenic	2.707	6	5	15	1	1	1
4:116086917:C:T	rs72667378	4	116086917	T	C	0.1997	0.000147347	-0.842354	0.220264	0.841616	rs59230330	8	MRPS33P3	22457	intergenic	8.953	4	7	15	1	0	1
4:116100311:A:C	rs76702909	4	116100311	C	A	0.1997	0.000148651	-0.841641	0.220206	0.841616	rs59230330	8	MRPS33P3	35851	intergenic	0.388	5	9	15	1	0	1
4:116093311:A:T	rs1940296	4	116093311	T	A	0.1999	0.000148869	-0.841581	0.220212	0.840625	rs59230330	8	MRPS33P3	28851	intergenic	6.549	6	9	15	1	0	1
4:116092432:C:T	rs4834456	4	116092432	C	T	0.2049	0.000149009	-0.841519	0.220209	0.816501	rs59230330	8	MRPS33P3	27972	intergenic	1.182	5	9	15	1	0	1
4:116095126:C:T	rs7441404	4	116095126	T	C	0.2017	0.000149014	-0.841528	0.220212	0.83192	rs59230330	8	MRPS33P3	30666	intergenic	1.035	7	15	15	1	0	1
4:116076141:A:G	rs72667358	4	116076141	A	G	0.2015	0.000150332	-0.842023	0.22047	0.836843	rs59230330	8	MRPS33P3	11681	intergenic	2.042	2b	7	15	1	0	1
4:116078707:C:G	rs4834453	4	116078707	G	C	0.1997	0.000150417	-0.841963	0.220463	0.841616	rs59230330	8	MRPS33P3	14247	intergenic	3.336	6	5	15	1	0	1
7:108098896:C:T	rs56823224	7	108098896	T	C	0.03594	0.000152138	-1.91329	0.501362	0.497345	rs141901173	11	NRCAM	1734	intergenic	0.282	5	5	13	1	1	1
7:108099850:C:T	rs114579515	7	108099850	C	T	0.03594	0.000152138	-1.91329	0.501362	0.497345	rs141901173	11	NRCAM	2688	intergenic	0.62	6	5	14	1	1	1
7:108100026:A:T	rs77379131	7	108100026	A	T	0.03594	0.000152724	-1.91282	0.501369	0.497345	rs141901173	11	NRCAM	2864	intergenic	4.544	7	5	14	1	1	1
7:108100542:A:T	rs77555472	7	108100542	A	T	0.03594	0.000152724	-1.91282	0.501369	0.497345	rs141901173	11	NRCAM	3380	intergenic	4.864	2b	5	14	1	1	1
17:10049553:A:G	rs6503290	17	10049553	A	G	0.3614	0.000155324	-0.662779	0.173916	0.104131	rs12935988	20	GAS7:AC000003.2	00:00:00	UTR3	0.342	6	5	15	1	0	1
17:10044532:A:C	rs34185841	17	10044532	C	A	0.1827	0.000155937	-0.806659	0.211727	0.116873	rs12935988	20	GAS7	0	intronic	0.914	6	5	15	1	0	1
19:13695310:C:G	rs2112466	19	13695310	C	G	0.492	0.000156187	-0.75073	0.197068	0.521895	rs7252743	21	CACNA1A	0	intronic	0.051	6	5	15	1	0	1
19:13695598:A:G	rs4926304	19	13695598	A	G	0.4912	0.00015772	-0.750504	0.197137	0.520149	rs7252743	21	CACNA1A	0	intronic	0.257	6	5	15	1	0	1
4:67366927:A:C	rs17731127	4	67366927	A	C	0.03714	0.000159378	-1.44569	0.380008	0.123818	rs67668930	7	RPS23P3	69687	intergenic	15.34	7	14	15	0	0	1
4:116176173:C:T	rs72669547	4	116176173	T	C	0.2101	0.000163469	-0.829608	0.218439	0.774646	rs59230330	8	MRPS33P3	111713	intergenic	4.196	7	9	15	0	0	1
4:116093537:G:T	rs948186	4	116093537	G	T	0.2173	0.000165154	-0.829497	0.21856	0.765804	rs59230330	8	MRPS33P3	29077	intergenic	0.673	NA	9	15	1	0	1
4:116073007:C:T	rs17623668	4	116073007	T	C	0.2017	0.000165915	-0.83711	0.220634	0.838131	rs59230330	8	MRPS33P3	8547	intergenic	6.011	6	5	15	1	0	1
4:116098976:C:T	rs11098284	4	116098976	T	C	0.2049	0.000168545	-0.835006	0.220313	0.816501	rs59230330	8	MRPS33P3	34516	intergenic	3.827	7	9	15	1	0	1
17:10045023:A:G	rs11651344	17	10045023	A	G	0.1807	0.000168766	-0.80286	0.21185	0.122284	rs12935988	20	GAS7	0	intronic	0.788	5	5	15	1	0	1
3:14396952:C:T	rs767070	3	14396952	C	T	0.2296	0.00017025	0.685717	0.181046	0.18285	rs13091718	5	RP11-536I6.1	2883	intergenic	0.418	7	5	15	1	0	1
4:116094401:C:T	rs143268528	4	116094401	T	C	0.2173	0.000170663	-0.828131	0.218683	0.765804	rs59230330	8	MRPS33P3	29941	intergenic	0.959	7	15	15	1	0	1
4:116094689:C:G	rs12500926	4	116094689	C	G	0.2173	0.000170663	-0.828131	0.218683	0.765804	rs59230330	8	MRPS33P3	30229	intergenic	0.488	7	15	15	1	0	1
4:67118667:A:G	rs400524	4	67118667	A	G	0.1599	0.000170945	-1.15218	0.304289	0.159199	rs67668930	7	MIR1269A	23874	intergenic	4.203	NA	15	15	1	0	1
17:10077966:A:G	rs9905336	17	10077966	A	G	0.3848	0.000175549	-0.665185	0.175989	0.213704	rs8081398	20	GAS7	0	intronic	0.479	4	5	15	1	0	1
4:67250189:C:T	rs147274843	4	67250189	T	C	0.01378	0.000175698	-1.86327	0.492999	0.13197	rs67668930	7	RPS23P3	46620	intergenic	2.434	6	9	15	1	0	1
4:116099668:A:G	rs4834457	4	116099668	G	A	0.2019	0.000178495	-0.830938	0.220091	0.829288	rs59230330	8	MRPS33P3	35208	intergenic	0.933	7	9	15	1	0	1
14:50858612:C:T	rs7155715	14	50858612	C	T	0.2181	0.000178672	0.687423	0.182091	0.237127	rs12896268	19	CDKL1	0	intronic	5.058	6	4	15	1	1	1
4:116070384:A:G	rs766028	4	116070384	G	A	0.1993	0.00017995	-0.837134	0.221855	0.839633	rs59230330	8	MRPS33P3	5924	intergenic	0.598	NA	5	15	1	0	1
14:50856927:A:G	rs10131126	14	50856927	A	G	0.2442	0.000186003	0.672745	0.178691	0.242263	rs12896268	19	CDKL1	0	intronic	10.12	5	2	15	1	0	1
7:9470821:C:T	rs80013760	7	9470821	T	C	0.08347	0.000192	-1.23789	0.329515	0.218078	rs77755643	10	AC079756.1	163425	intergenic	1.987	6	9	15	0	0	0
7:108123215:A:T	rs78168899	7	108123215	T	A	0.01817	0.000194334	-1.91047	0.508972	0.372975	rs141901173	11	PNPLA8	0	intronic	2.604	7	4	5	1	1	1
3:14374615:C:T	rs4684207	3	14374615	C	T	0.3179	0.000196016	0.63401	0.169008	0.123024	rs13091718	5	RP11-536I6.1	15335	intergenic	4.782	5	5	15	1	0	1
23:81558183:A:G	rs56195276	23	81558183	A	G	0.1959	0.000200335	0.550355	0.146928	0.492106	rs73241354	22	RP4-581F12.1	194934	intergenic	7.456	7	9	15	0	0	1
4:116182572:C:T	rs10021248	4	116182572	C	T	0.2474	0.000200729	-0.795892	0.212508	0.598225	rs59230330	8	MRPS33P3	118112	intergenic	0.482	6	7	15	0	0	1
1:160337247:C:T	rs11265375	1	160337247	C	T	0.2161	0.000201911	-0.806149	0.215333	0.240288	rs77847479	2	NHLH1	0	intronic	3.542	4	1	15	1	1	1
1:160337339:C:T	rs11265376	1	160337339	C	T	0.2101	0.000202126	-0.806073	0.215329	0.247321	rs77847479	2	NHLH1	0	intronic	7.218	4	1	15	1	1	1
4:67397007:A:G	rs61652456	4	67397007	A	G	0.02776	0.000202536	-1.42746	0.381375	0.106828	rs67668930	7	RPS23P3	99767	intergenic	5.069	6	15	15	0	0	1
4:67397580:G:T	rs73826711	4	67397580	T	G	0.02955	0.000202651	-1.42743	0.381382	0.106796	rs67668930	7	RPS23P3	100340	intergenic	3.785	6	15	15	0	0	1
4:67376403:G:T	rs116757784	4	67376403	T	G	0.02756	0.000202785	-1.42742	0.381397	0.107961	rs67668930	7	RPS23P3	79163	intergenic	0.008	7	9	15	0	0	1
4:116187866:A:G	rs2102402	4	116187866	G	A	0.2574	0.000204286	-0.797758	0.213264	0.548528	rs59230330	8	MRPS33P3	123406	intergenic	0.704	7	15	15	0	0	1
7:9481472:A:C	rs12113094	7	9481472	C	A	0.08087	0.000204487	-1.2317	0.329291	0.167014	rs77755643	10	AC079756.1	152774	intergenic	0.258	7	9	15	0	0	1
17:10095871:A:G	rs35376838	17	10095871	A	G	0.01817	0.000207376	-1.46599	0.392308	0.119593	rs12935988	20	GAS7	0	intronic	0.196	6	2	15	1	0	1
1:160339271:C:T	rs10908777	1	160339271	T	C	0.252	0.000208815	-0.777461	0.208154	0.190115	rs77847479	2	NHLH1	0	intronic	1.595	5	1	15	1	1	1
3:14379625:C:G	rs900180	3	14379625	G	C	0.3195	0.000210099	0.628087	0.168232	0.117744	rs13091718	5	RP11-536I6.1	10325	intergenic	1.815	7	5	15	1	0	1
1:160342944:A:G	rs11265378	1	160342944	G	A	0.2119	0.000210721	-0.801786	0.214801	0.247914	rs77847479	2	NHLH1	305	downstream	4.251	5	5	15	1	1	1
3:14379895:A:G	rs893083	3	14379895	A	G	0.3201	0.000211039	0.627894	0.168232	0.118655	rs13091718	5	RP11-536I6.1	10055	intergenic	0.865	NA	5	15	1	0	1
7:9481460:C:G	rs12111842	7	9481460	G	C	0.08227	0.000211772	-1.23552	0.331115	0.163983	rs77755643	10	AC079756.1	152786	intergenic	0.241	7	9	15	0	0	1
4:116186591:C:T	rs10017231	4	116186591	C	T	0.2498	0.000211823	-0.795386	0.213164	0.569274	rs59230330	8	MRPS33P3	122131	intergenic	4.33	6	14	15	0	0	1
1:160341142:C:T	rs10908778	1	160341142	T	C	0.2534	0.000214229	-0.775036	0.207873	0.192097	rs77847479	2	NHLH1	0	UTR3	3.341	5	4	15	1	1	1
7:108175455:A:G	rs6945432	7	108175455	G	A	0.03375	0.000220024	-1.71585	0.461065	0.214452	rs141901173	11	PNPLA8	0	intergenic	1.211	6	5	15	1	1	1
7:9487136:G:T	rs11972100	7	9487136	G	T	0.08666	0.00022232	-1.21696	0.327244	0.207863	rs77755643	10	AC079756.1	147110	intergenic	0.545	7	9	15	0	0	1
7:9486339:A:G	rs73675055	7	9486339	A	G	0.08866	0.000222321	-1.21694	0.32724	0.202088	rs77755643	10	AC079756.1	147907	intergenic	0.71	6	9	15	0	0	1
7:9486565:A:T	rs56383251	7	9486565	A	T	0.08666	0.000222413	-1.21692	0.327245	0.207863	rs77755643	10	AC079756.1	147681	intergenic	2.778	6	9	15	0	0	1
7:9486528:A:G	rs55846604	7	9486528	G	A	0.08666	0.000222525	-1.2169	0.327249	0.207863	rs77755643	10	AC079756.1	147718	intergenic	1.524	7	9	15	0	0	1
3:14378388:A:G	rs2086568	3	14378388	G	A	0.3203	0.000222847	0.625921	0.16834	0.112431	rs13091718	5	RP11-536I6.1	11562	intergenic	3.724	5	5	15	1	0	1
7:9471876:A:AT	rs112603777	7	9471876	AT	A	0.08746	0.000224219	-1.21641	0.327291	0.204956	rs77755643	10	AC079756.1	162370	intergenic	14.33	NA	9	15	0	0	0
7:108170414:A:G	rs140470442	7	108170414	G	A	0.03215	0.00022424	-1.71289	0.46088	0.158468	rs141901173	11	PNPLA8	0	intergenic	0.033	7	5	15	1	1	1
7:9478178:A:T	rs6971015	7	9478178	T	A	0.08766	0.00022452	-1.21602	0.327218	0.204474	rs77755643	10	AC079756.1	156068	intergenic	1.553	6	9	15	0	0	0
7:9471284:A:C	rs73675050	7	9471284	C	A	0.08826	0.00022459	-1.216	0.327218	0.203037	rs77755643	10	AC079756.1	162962	intergenic	6.776	6	9	15	0	0	0
7:9471357:A:G	rs73675051	7	9471357	A	G	0.08686	0.00022459	-1.216	0.327218	0.206416	rs77755643	10	AC079756.1	162889	intergenic	1.034	7	9	15	0	0	0
7:9473008:A:G	rs35522440	7	9473008	G	A	0.08806	0.000224591	-1.216	0.327218	0.203514	rs77755643	10	AC079756.1	161238	intergenic	0.52	7	9	15	0	0	0
7:9473084:G:T	rs34927282	7	9473084	G	T	0.08806	0.000224591	-1.216	0.327218	0.203514	rs77755643	10	AC079756.1	161162	intergenic	0.618	6	9	15	0	0	0
7:9475837:C:T	rs73675053	7	9475837	T	C	0.08826	0.000224591	-1.216	0.327218	0.203037	rs77755643	10	AC079756.1	158409	intergenic	0.953	5	9	15	0	0	0
7:9476279:A:T	rs11977852	7	9476279	T	A	0.08726	0.000224591	-1.216	0.327218	0.205441	rs77755643	10	AC079756.1	157967	intergenic	0.077	6	8	15	0	0	0
7:9476667:C:T	rs57669968	7	9476667	C	T	0.08726	0.000224591	-1.216	0.327218	0.205441	rs77755643	10	AC079756.1	157579	intergenic	0.948	7	9	15	0	0	0
7:9475415:C:T	rs11973398	7	9475415	C	T	0.08786	0.000224647	-1.21588	0.327193	0.203993	rs77755643	10	AC079756.1	158831	intergenic	0.282	6	9	15	0	0	0
7:9482030:C:T	rs113816694	7	9482030	C	T	0.08746	0.000225538	-1.21621	0.327372	0.204956	rs77755643	10	AC079756.1	152216	intergenic	0.582	7	9	15	0	0	1
4:67142703:C:G	rs34321123	4	67142703	G	C	0.1172	0.000228154	-1.18325	0.318756	0.514119	rs67668930	7	MIR1269A	56	downstream	1.647	7	9	15	1	0	1
1:54476931:A:G	rs72664117	1	54476931	A	G	0.359	0.000230001	-0.593308	0.159922	0.363762	rs954878	1	LDLRAD1	0	intronic	0.093	5	5	15	1	1	1
4:116092182:A:T	rs12643235	4	116092182	T	A	0.2055	0.000230202	-0.815754	0.219894	0.813652	rs59230330	8	MRPS33P3	27722	intergenic	1.941	7	9	15	1	0	1
3:14376548:A:G	rs9310442	3	14376548	G	A	0.3195	0.000230793	0.62752	0.169185	0.120532	rs13091718	5	RP11-536I6.1	13402	intergenic	1.688	6	5	15	1	0	1
3:14375981:C:T	rs4685133	3	14375981	C	T	0.3307	0.000231886	0.624648	0.168466	0.101849	rs13091718	5	RP11-536I6.1	13969	intergenic	0.068	5	5	15	1	0	1
7:9481442:C:T	rs12113857	7	9481442	T	C	0.08287	0.000232178	-1.22028	0.329136	0.160419	rs77755643	10	AC079756.1	152804	intergenic	0.599	6	9	15	0	0	1
4:67142691:G:T	rs67857601	4	67142691	G	T	0.1172	0.000232372	-1.18217	0.318874	0.514119	rs67668930	7	MIR1269A	44	downstream	3.484	7	9	15	1	0	1
7:9471900:A:G	rs55738593	7	9471900	G	A	0.08686	0.000232471	-1.21342	0.327315	0.206416	rs77755643	10	AC079756.1	162346	intergenic	10.36	6	9	15	0	0	0
4:14173876:A:G	rs201626197	4	14173876	A	G	0.3151	0.00023487	0.743144	0.200604	0.19563	rs1968315	6	RP11-669M16.1	0	ncRNA_intronic	3.503	7	1	15	1	1	1
4:14173877:G:T	rs200114742	4	14173877	G	T	0.3151	0.000234933	0.743116	0.2006	0.19563	rs1968315	6	RP11-669M16.1	0	ncRNA_intronic	1.687	7	1	15	1	1	1
4:116182281:A:G	rs10021109	4	116182281	G	A	0.2502	0.00024323	-0.784194	0.212207	0.588283	rs59230330	8	MRPS33P3	117821	intergenic	1.789	7	9	15	0	0	1
4:116126550:T:TTTTG	rs10660861	4	116126550	T	TTTTG	0.2063	0.000245188	-0.823693	0.223022	0.782757	rs59230330	8	MRPS33P3	62090	intergenic	3.322	NA	9	15	0	0	1
7:108130329:A:C	rs114250010	7	108130329	A	C	0.03175	0.000245587	-1.82213	0.493414	0.210692	rs141901173	11	PNPLA8	0	intronic	16.01	6	4	5	1	1	1
3:14371297:C:T	rs4685123	3	14371297	T	C	0.2063	0.000257413	0.666986	0.181216	0.263738	rs13091718	5	RP11-536I6.1	18653	intergenic	2.572	4	5	15	1	0	1
3:14373385:C:T	rs6802655	3	14373385	T	C	0.3189	0.000265501	0.621401	0.169204	0.116915	rs13091718	5	RP11-536I6.1	16565	intergenic	0.481	5	5	15	1	0	1
3:14380217:A:C	rs900182	3	14380217	A	C	0.2031	0.000271688	0.660303	0.180093	0.272936	rs13091718	5	RP11-536I6.1	9733	intergenic	0.033	7	5	15	1	0	1
4:67232852:G:GGCT	rs71659221	4	67232852	GGCT	G	0.08207	0.000272617	-1.5291	0.417153	0.184426	rs67668930	7	RPS23P3	63957	intergenic	1.466	NA	9	15	0	0	1
4:67232429:A:G	rs17087058	4	67232429	G	A	0.08227	0.000272766	-1.52849	0.417003	0.215824	rs67668930	7	RPS23P3	64380	intergenic	0.615	6	9	15	0	0	1
7:9522197:A:G	rs76662538	7	9522197	A	G	0.05751	0.000274823	-1.20743	0.329589	0.334672	rs77755643	10	AC079756.1	112049	intergenic	14.12	7	9	15	0	0	1
7:9522955:C:T	rs76282927	7	9522955	T	C	0.05751	0.000274828	-1.20742	0.329586	0.334672	rs77755643	10	AC079756.1	111291	intergenic	6.075	7	9	15	0	0	1
4:14274872:A:T	rs76360447	4	14274872	T	A	0.1362	0.000275174	0.826116	0.225523	0.221888	rs1968315	6	RP11-669M16.1	30434	intergenic	1.913	5	5	15	1	0	1
7:9490333:C:T	rs12112068	7	9490333	T	C	0.1064	0.000275661	-1.17171	0.319908	0.148612	rs77755643	10	AC079756.1	143913	intergenic	9.141	6	5	15	0	0	1
7:9520286:C:T	rs56305742	7	9520286	C	T	0.05771	0.000278884	-1.2069	0.329792	0.331072	rs77755643	10	AC079756.1	113960	intergenic	5.611	6	9	15	0	0	1
4:116169689:A:C	rs11731910	4	116169689	A	C	0.2204	0.00028306	-0.782288	0.213993	0.723861	rs59230330	8	MRPS33P3	105229	intergenic	0.956	6	5	15	0	0	1
1:173289404:A:G	rs6694196	1	173289404	G	A	0.0615	0.000283559	-1.20046	0.328426	0.432129	rs72724954	3	RP11-296O14.1	31423	intergenic	2.317	7	5	15	1	0	1
7:9518249:A:G	rs78737143	7	9518249	A	G	0.05771	0.000284782	-1.20446	0.329622	0.333457	rs77755643	10	AC079756.1	115997	intergenic	8.65	6	9	15	0	0	1
13:54881373:G:GTTGT	rs138259425	13	54881373	GTTGT	G	0.14	0.000290951	-0.93661	0.256716	0.285513	rs11619037	18	RPL13AP25	133465	intergenic	1.287	NA	5	15	0	0	1
1:54485787:C:T	rs72664123	1	54485787	T	C	0.363	0.000292292	-0.586463	0.160797	0.364066	rs954878	1	LDLRAD1	1930	intergenic	2.302	4	5	15	1	1	1
2:118931879:G:T	rs7595800	2	118931879	T	G	0.2478	0.000295789	-0.820954	0.225285	0.590448	rs2422177	4	AC093901.1	0	ncRNA_intronic	0.172	7	5	15	1	1	1
7:9471668:G:T	rs10258920	7	9471668	T	G	0.07987	0.000299757	-1.19979	0.329564	0.227127	rs77755643	10	AC079756.1	162578	intergenic	0.042	6	9	15	0	0	0
3:14383370:A:G	rs2341963	3	14383370	G	A	0.3682	0.000300697	0.595406	0.163585	0.508652	rs13091718	5	RP11-536I6.1	6580	intergenic	1.773	7	5	15	1	0	1
7:9465307:C:T	rs75348046	7	9465307	C	T	0.06989	0.000305008	-1.20215	0.330626	0.269212	rs77755643	10	AC079756.1	168939	intergenic	0.716	6	9	15	0	0	0
7:9457699:A:G	rs73675046	7	9457699	G	A	0.06969	0.00030561	-1.20727	0.332084	0.274578	rs77755643	10	AC079756.1	176547	intergenic	0.543	7	9	15	0	0	0
7:9463598:C:G	rs57240848	7	9463598	C	G	0.06769	0.000307016	-1.20683	0.332072	0.284359	rs77755643	10	AC079756.1	170648	intergenic	0.825	6	9	15	0	0	0
7:9463946:A:G	rs113429797	7	9463946	G	A	0.06869	0.000307107	-1.20679	0.332069	0.278593	rs77755643	10	AC079756.1	170300	intergenic	1.789	6	9	15	0	0	0
7:9463947:C:T	rs111905836	7	9463947	C	T	0.06809	0.000307107	-1.20679	0.332069	0.282682	rs77755643	10	AC079756.1	170299	intergenic	1.753	6	9	15	0	0	0
7:9465264:A:G	rs73675048	7	9465264	G	A	0.06889	0.000307107	-1.20679	0.332069	0.276201	rs77755643	10	AC079756.1	168982	intergenic	1.533	6	9	15	0	0	0
7:9465838:C:T	rs59647880	7	9465838	C	T	0.06829	0.000307107	-1.20679	0.332069	0.278623	rs77755643	10	AC079756.1	168408	intergenic	0.31	6	9	15	0	0	0
7:9469997:A:G	rs12112621	7	9469997	A	G	0.06909	0.000307107	-1.20679	0.332069	0.275402	rs77755643	10	AC079756.1	164249	intergenic	5.909	7	9	15	0	0	0
7:9460447:A:G	rs59570473	7	9460447	A	G	0.06949	0.000307587	-1.20679	0.332107	0.273816	rs77755643	10	AC079756.1	173799	intergenic	1.012	7	9	15	0	0	0
7:9465715:T:TTTG	rs139539047	7	9465715	TTTG	T	0.06829	0.000308059	-1.20671	0.332123	0.281851	rs77755643	10	AC079756.1	168531	intergenic	3.097	NA	9	15	0	0	0
7:9464246:C:T	rs7800014	7	9464246	C	T	0.06869	0.000311484	-1.20705	0.332485	0.278593	rs77755643	10	AC079756.1	170000	intergenic	8.35	7	9	15	0	0	0
1:54585415:C:T	rs12063422	1	54585415	T	C	0.4105	0.00031379	-0.586839	0.161733	0.409793	rs954878	1	TCEANC2	7222	intergenic	3.388	5	1	15	1	0	1
23:81554197:A:C	rs73241353	23	81554197	C	A	0.1981	0.000314817	0.52997	0.146094	0.477125	rs73241354	22	RP4-581F12.1	198920	intergenic	3.001	6	9	15	0	0	1
13:54883366:C:T	rs11619551	13	54883366	C	T	0.142	0.000315311	-0.929991	0.256396	0.279687	rs11619037	18	RPL13AP25	131472	intergenic	1.099	7	5	15	0	0	1
23:81953911:A:G	rs56023329	23	81953911	A	G	0.07528	0.000324909	0.643924	0.177918	0.407814	rs73241354	22	SNORA4	137114	intergenic	7.838	6	9	15	0	0	1
7:9507298:C:T	rs73266128	7	9507298	T	C	0.06709	0.000325362	-1.19618	0.330541	0.265382	rs77755643	10	AC079756.1	126948	intergenic	1.2	6	9	15	0	0	1
7:9465832:C:T	rs56172899	7	9465832	C	T	0.06889	0.000326308	-1.20292	0.332476	0.276201	rs77755643	10	AC079756.1	168414	intergenic	0.932	6	9	15	0	0	0
7:9525434:A:T	rs77454263	7	9525434	T	A	0.04872	0.000327301	-1.22474	0.338581	0.39294	rs77755643	10	AC079756.1	108812	intergenic	0.639	7	9	15	0	0	1
7:9526287:A:T	rs113285747	7	9526287	A	T	0.04872	0.000327398	-1.22474	0.338589	0.39294	rs77755643	10	AC079756.1	107959	intergenic	0.139	6	5	15	0	0	1
7:9516735:C:T	rs77492929	7	9516735	C	T	0.04832	0.000340401	-1.22229	0.338883	0.396268	rs77755643	10	AC079756.1	117511	intergenic	1.73	6	7	15	0	0	1
7:9517309:C:G	rs75133515	7	9517309	G	C	0.04852	0.000341077	-1.22206	0.338867	0.394597	rs77755643	10	AC079756.1	116937	intergenic	2.63	7	9	15	0	0	1
7:9518669:A:G	rs186049935	7	9518669	G	A	0.04852	0.000342049	-1.22171	0.338843	0.394597	rs77755643	10	AC079756.1	115577	intergenic	0.195	6	9	15	0	0	1
7:9518674:A:AAG	rs112657503	7	9518674	AAG	A	0.04852	0.000342405	-1.22176	0.338882	0.394597	rs77755643	10	AC079756.1	115572	intergenic	0.928	NA	9	15	0	0	1
1:54483694:C:T	rs34764952	1	54483694	C	T	0.3444	0.000343058	-0.578164	0.160389	0.401282	rs954878	1	LDLRAD1	0	intronic	5.611	4	5	15	1	1	1
1:173284087:C:G	rs4916320	1	173284087	C	G	0.07169	0.000343226	-0.970099	0.269126	0.503427	rs72724954	3	snoU13	33777	intergenic	0.232	5	5	15	1	0	1
7:9508504:C:T	rs2350854	7	9508504	T	C	0.1106	0.00034539	-1.15391	0.320267	0.129536	rs77755643	10	AC079756.1	125742	intergenic	1.648	7	9	15	0	0	1
1:54584278:A:G	rs11579628	1	54584278	A	G	0.3976	0.000348943	-0.571788	0.15882	0.161322	rs954878	1	TCEANC2	6085	intergenic	0.194	4	2	15	1	0	1
17:10066735:C:G	rs12948515	17	10066735	G	C	0.1178	0.000356899	-0.697283	0.194002	0.160125	rs12935988	20	GAS7	0	intronic	0.724	6	5	15	1	0	1
4:67380577:G:T	rs60371805	4	67380577	G	T	0.07208	0.000388527	-1.2955	0.362735	0.102592	rs67668930	7	RPS23P3	83337	intergenic	13.57	7	14	15	0	0	1
23:81973126:A:G	rs56064144	23	81973126	A	G	0.07428	0.000399519	0.647824	0.181769	0.407991	rs73241354	22	SNORA4	156329	intergenic	5.037	7	5	15	0	0	1
1:173288397:G:T	rs10912588	1	173288397	G	T	0.0599	0.000404303	-1.17338	0.32953	0.445973	rs72724954	3	RP11-296O14.1	32430	intergenic	1.364	7	5	15	1	0	1
1:173288743:A:G	rs11807348	1	173288743	G	A	0.0601	0.00041231	-1.17397	0.330184	0.441129	rs72724954	3	RP11-296O14.1	32084	intergenic	2.484	5	5	15	1	0	1
7:9490281:A:G	rs16876033	7	9490281	A	G	0.09824	0.000416745	-1.15301	0.324553	0.165332	rs77755643	10	AC079756.1	143965	intergenic	0.725	6	5	15	0	0	1
1:54585635:A:G	rs113604198	1	54585635	A	G	0.4034	0.000421566	-0.574276	0.16179	0.43268	rs954878	1	TCEANC2	7442	intergenic	6.834	3a	1	15	1	0	1
1:173290410:C:T	rs11590091	1	173290410	C	T	0.0599	0.000438766	-1.16685	0.32974	0.445973	rs72724954	3	RP11-296O14.1	30417	intergenic	4.243	7	5	15	1	0	1
7:9430391:A:G	rs11972653	7	9430391	A	G	0.08427	0.000447949	-1.13411	0.320994	0.218117	rs77755643	10	AC079756.1	203855	intergenic	3.072	6	9	15	0	0	1
7:9505838:A:G	rs73266116	7	9505838	G	A	0.09265	0.000455998	-1.15227	0.32658	0.168461	rs77755643	10	AC079756.1	128408	intergenic	0.492	7	9	15	0	0	1
7:9509911:A:C	rs57807858	7	9509911	C	A	0.09824	0.000465319	-1.15048	0.326583	0.153245	rs77755643	10	AC079756.1	124335	intergenic	0.52	5	9	15	0	0	1
1:54575746:C:T	rs4927055	1	54575746	C	T	0.2907	0.00046802	-0.589647	0.167455	0.754129	rs954878	1	TCEANC2	0	intergenic	2.998	1f	5	15	1	1	1
1:54566190:A:G	rs6694292	1	54566190	G	A	0.2895	0.000479276	-0.590104	0.167894	0.751283	rs954878	1	TCEANC2	0	upstream	5.089	6	4	5	1	1	1
4:14170843:C:CT	rs112496959	4	14170843	CT	C	0.3636	0.000481642	0.671151	0.191025	0.166549	rs1968315	6	RP11-669M16.1	0	ncRNA_intronic	0.997	NA	5	15	1	0	1
4:67356937:A:G	rs73829803	4	67356937	A	G	0.04613	0.000481901	-1.3116	0.373328	0.163359	rs67668930	7	RPS23P3	59697	intergenic	5.213	6	5	15	0	0	1
4:67357454:A:C	rs17730929	4	67357454	A	C	0.04673	0.000482355	-1.3114	0.373297	0.163091	rs67668930	7	RPS23P3	60214	intergenic	8.887	NA	5	15	0	0	1
4:14170091:G:T	rs28380424	4	14170091	G	T	0.3636	0.000482432	0.671048	0.19102	0.166278	rs1968315	6	RP11-669M16.1	0	ncRNA_intronic	0.821	5	2	15	1	0	1
8:69912682:A:C	rs4737934	8	69912682	A	C	0.07468	0.000488065	-0.969711	0.276286	0.161074	rs2912504	13	RP11-600K15.1	0	ncRNA_intronic	3.092	6	5	15	1	0	1
3:14376664:G:T	rs35005811	3	14376664	T	G	0.2075	0.000492093	-0.587474	0.167488	0.18425	rs13091718	5	RP11-536I6.1	13286	intergenic	1.057	5	5	15	1	0	1
4:67357486:C:T	rs73829804	4	67357486	C	T	0.07368	0.000493844	-1.28672	0.366942	0.140665	rs67668930	7	RPS23P3	60246	intergenic	8.589	6	5	15	0	0	1
1:54474472:C:T	rs6672989	1	54474472	T	C	0.354	0.00049636	-0.565551	0.161346	0.364863	rs954878	1	LDLRAD1	0	UTR3	0.957	5	5	15	1	1	1
1:160198201:C:T	rs75426089	1	160198201	T	C	0.01917	0.000501702	-1.68568	0.481309	0.197022	rs77847479	2	DCAF8:DCAF8	00:00:00	intronic	3.71	6	4	4	1	1	1
4:116091929:A:G	rs7683907	4	116091929	G	A	0.2987	0.000504773	-0.732488	0.209245	0.433061	rs59230330	8	MRPS33P3	27469	intergenic	2.007	5	9	15	1	0	1
7:9470737:G:T	rs77558552	7	9470737	G	T	0.08826	0.000509867	-1.12636	0.322012	0.203037	rs77755643	10	AC079756.1	163509	intergenic	0.378	7	9	15	0	0	0
7:9470767:A:T	rs79223149	7	9470767	A	T	0.08626	0.000509867	-1.12636	0.322012	0.208857	rs77755643	10	AC079756.1	163479	intergenic	4.373	6	9	15	0	0	0
7:9470564:A:G	rs112463336	7	9470564	A	G	0.08686	0.000510015	-1.12635	0.322017	0.207369	rs77755643	10	AC079756.1	163682	intergenic	0.222	7	9	15	0	0	0
7:9470499:C:T	rs74335869	7	9470499	C	T	0.08826	0.000510276	-1.1263	0.322015	0.203037	rs77755643	10	AC079756.1	163747	intergenic	0.82	7	9	15	0	0	0
7:9457574:C:T	rs11984178	7	9457574	T	C	0.08826	0.000514324	-1.12535	0.32194	0.203964	rs77755643	10	AC079756.1	176672	intergenic	5.164	6	9	15	0	0	0
4:14250751:A:T	rs6853041	4	14250751	A	T	0.2612	0.000515153	0.817654	0.233945	0.317682	rs1968315	6	RP11-669M16.1	6313	intergenic	0.343	7	5	15	1	0	1
7:9462569:C:T	rs56671865	7	9462569	C	T	0.08806	0.000515821	-1.125	0.321914	0.203514	rs77755643	10	AC079756.1	171677	intergenic	5.68	6	9	15	0	0	0
7:9463704:A:G	rs7455699	7	9463704	A	G	0.08866	0.000515821	-1.125	0.321914	0.201176	rs77755643	10	AC079756.1	170542	intergenic	0.201	6	9	15	0	0	0
7:9463433:G:T	rs2882519	7	9463433	T	G	0.08886	0.000515881	-1.125	0.321918	0.200708	rs77755643	10	AC079756.1	170813	intergenic	5.021	6	9	15	0	0	0
7:9457056:A:G	rs112992463	7	9457056	A	G	0.08806	0.00051685	-1.12497	0.321957	0.204445	rs77755643	10	AC079756.1	177190	intergenic	0.421	7	9	15	0	0	0
7:9462232:A:T	rs59186709	7	9462232	T	A	0.08806	0.000516953	-1.12493	0.32195	0.203514	rs77755643	10	AC079756.1	172014	intergenic	2.848	6	9	15	0	0	0
4:14173424:A:G	rs11938989	4	14173424	G	A	0.3636	0.000522743	0.664735	0.19041	0.163246	rs1968315	6	RP11-669M16.1	0	ncRNA_intronic	2.242	7	5	15	1	1	1
1:54543104:C:CA	rs11356504	1	54543104	CA	C	0.2887	0.000531199	-0.592552	0.169947	0.701445	rs954878	1	TCEANC2	0	intronic	5.183	NA	4	5	1	1	1
7:9463343:C:T	rs2350836	7	9463343	T	C	0.08866	0.000535457	-1.12356	0.322447	0.201176	rs77755643	10	AC079756.1	170903	intergenic	1.13	7	9	15	0	0	0
1:173286808:C:T	rs10494489	1	173286808	T	C	0.07009	0.000543023	-0.94423	0.271281	0.516491	rs72724954	3	RP11-296O14.1	34019	intergenic	4.503	7	5	15	1	0	1
1:54560672:A:G	rs66746724	1	54560672	G	A	0.2905	0.000550574	-0.58412	0.168002	0.751852	rs954878	1	TCEANC2	0	intronic	0.017	6	4	5	1	1	1
3:14383632:A:G	rs6794796	3	14383632	G	A	0.2101	0.000552548	0.627353	0.180488	0.242101	rs13091718	5	RP11-536I6.1	6318	intergenic	2.402	7	5	15	1	0	1
1:54580106:A:C	rs34374665	1	54580106	A	C	0.3752	0.000563479	0.57407	0.165415	0.149505	rs954878	1	TCEANC2	1913	intergenic	1.603	5	5	15	1	0	1
7:108181943:A:G	rs76468149	7	108181943	G	A	0.01518	0.000580049	-1.87296	0.540926	0.332998	rs141901173	11	PNPLA8	0	intergenic	0.483	7	1	15	1	1	1
7:108195021:C:G	rs117845423	7	108195021	G	C	0.01518	0.000580049	-1.87296	0.540926	0.332998	rs141901173	11	PNPLA8:THAP5	00:00:00	intergenic	0.045	7	5	15	1	1	1
7:108195052:A:G	rs76082305	7	108195052	A	G	0.01518	0.000580049	-1.87296	0.540926	0.332998	rs141901173	11	PNPLA8:THAP5	00:00:00	intergenic	4.672	7	5	15	1	1	1
7:108198301:A:G	rs114798023	7	108198301	A	G	0.01518	0.000580049	-1.87296	0.540926	0.332998	rs141901173	11	PNPLA8:THAP5	00:00:00	intergenic	8.439	6	5	9	1	1	1
7:108206939:T:TAATA	rs147045954	7	108206939	TAATA	T	0.01518	0.000580057	-1.87304	0.540948	0.332998	rs141901173	11	PNPLA8:THAP5	00:00:00	intronic	6.757	NA	4	5	1	1	1
7:108203710:A:G	rs117154461	7	108203710	G	A	0.01518	0.000580312	-1.87298	0.540952	0.332998	rs141901173	11	PNPLA8:THAP5	00:00:00	UTR3	0.113	7	4	5	1	1	1
3:14385513:A:G	rs9844200	3	14385513	A	G	0.4836	0.000609255	-0.5405	0.156714	0.303765	rs13091718	5	RP11-536I6.1	4437	intergenic	1.022	5	5	15	1	0	1
1:54487146:A:G	rs12033166	1	54487146	G	A	0.3756	0.000650333	-0.559667	0.163126	0.370972	rs954878	1	LDLRAD1	3289	intergenic	2.168	7	5	15	1	1	1
7:9388478:C:T	rs118047116	7	9388478	T	C	0.02017	0.000652806	-1.21773	0.35504	0.436304	rs77755643	10	AC079756.1	245768	intergenic	1.833	6	5	15	0	0	1
7:108185782:C:T	rs115214569	7	108185782	C	T	0.01797	0.000687991	-1.81509	0.531469	0.288834	rs141901173	11	PNPLA8	0	intergenic	0.53	5	15	15	1	1	1
3:14402491:A:G	rs9878149	3	14402491	G	A	0.2194	0.000703177	0.620907	0.18213	0.189251	rs13091718	5	RP11-536I6.1	8422	intergenic	0.16	5	5	15	1	0	1
7:108183592:C:T	rs143141554	7	108183592	C	T	0.01518	0.000705588	-1.85486	0.544236	0.332998	rs141901173	11	PNPLA8	0	intergenic	1.66	7	15	15	1	1	1
1:54482236:A:C	rs1537321	1	54482236	C	A	0.4866	0.000721372	-0.548376	0.161192	0.12186	rs954878	1	LDLRAD1	0	intronic	0.037	2a	2	15	1	1	1
1:54485779:A:G	rs67676007	1	54485779	G	A	0.4986	0.000723561	-0.549594	0.16159	0.145436	rs954878	1	LDLRAD1	1922	intergenic	2.224	4	5	15	1	1	1
7:108220839:A:G	rs145554747	7	108220839	G	A	0.01657	0.000743239	-1.80055	0.530566	0.312287	rs141901173	11	DNAJB9	5544	intergenic	2.465	5	4	5	1	1	1
7:108220853:A:G	rs145424157	7	108220853	G	A	0.01637	0.000743239	-1.80055	0.530566	0.31619	rs141901173	11	DNAJB9	5558	intergenic	0.327	5	4	5	1	1	1
7:108222171:C:T	rs75761333	7	108222171	T	C	0.01558	0.000743239	-1.80055	0.530566	0.323912	rs141901173	11	DNAJB9	6876	intergenic	0.967	5	2	15	1	1	1
7:108222176:C:T	rs117493829	7	108222176	T	C	0.01558	0.000743239	-1.80055	0.530566	0.323912	rs141901173	11	DNAJB9	6881	intergenic	1.046	5	2	15	1	1	1
7:108216735:G:T	rs75958043	7	108216735	G	T	0.01657	0.000743431	-1.80059	0.530587	0.312287	rs141901173	11	DNAJB9	1440	intergenic	2.676	4	4	5	1	1	1
7:108217036:C:G	rs115863375	7	108217036	C	G	0.01697	0.000745007	-1.79969	0.530414	0.304738	rs141901173	11	DNAJB9	1741	intergenic	3.973	4	4	5	1	1	1
7:108214932:A:G	rs2286259	7	108214932	A	G	0.01677	0.000745408	-1.79946	0.53037	0.308471	rs141901173	11	DNAJB9	0	UTR3	1.966	7	2	5	1	1	1
7:108215230:C:T	rs80193567	7	108215230	C	T	0.01797	0.000745603	-1.79934	0.530348	0.281182	rs141901173	11	DNAJB9	0	UTR3	8.928	6	4	5	1	1	1
7:108217711:A:G	rs147101400	7	108217711	A	G	0.01558	0.00074681	-1.79911	0.530349	0.323912	rs141901173	11	DNAJB9	2416	intergenic	3.655	5	4	5	1	1	1
4:14167059:C:T	rs2903626	4	14167059	C	T	0.3658	0.000753299	0.640337	0.188896	0.165409	rs1968315	6	RP11-669M16.1	0	ncRNA_intronic	5.073	4	2	15	1	0	1
4:14276546:G:T	rs80132681	4	14276546	G	T	0.1909	0.000766	0.742253	0.219265	0.109411	rs1968315	6	RP11-669M16.1	32108	intergenic	0.215	6	5	15	1	0	1
14:51166483:C:T	rs4898666	14	51166483	T	C	0.4535	0.000768952	-0.541378	0.159976	0.138258	rs12896268	19	ZFP64P1	4577	intergenic	0.791	6	9	15	1	1	1
4:67381204:C:T	rs6830140	4	67381204	T	C	0.07228	0.000775622	-1.22237	0.361466	0.102125	rs67668930	7	RPS23P3	83964	intergenic	0.69	7	14	15	0	0	1
4:67379474:A:G	rs56007396	4	67379474	A	G	0.07228	0.000775797	-1.22232	0.36146	0.10157	rs67668930	7	RPS23P3	82234	intergenic	0.401	7	14	15	0	0	1
4:67380608:C:T	rs61175130	4	67380608	T	C	0.07208	0.000775797	-1.22232	0.36146	0.102592	rs67668930	7	RPS23P3	83368	intergenic	13.84	6	14	15	0	0	1
4:67386283:C:T	rs57195882	4	67386283	C	T	0.07208	0.000775797	-1.22232	0.36146	0.102592	rs67668930	7	RPS23P3	89043	intergenic	0.546	7	14	15	0	0	1
4:67398864:A:G	rs73826712	4	67398864	A	G	0.07208	0.000775797	-1.22232	0.36146	0.102592	rs67668930	7	RPS23P3	101624	intergenic	1.298	5	15	15	0	0	1
4:67399264:A:G	rs73826715	4	67399264	G	A	0.07228	0.000775797	-1.22232	0.36146	0.102125	rs67668930	7	RPS23P3	102024	intergenic	0.306	7	15	15	0	0	1
4:67381935:A:G	rs73826706	4	67381935	G	A	0.07208	0.000777528	-1.22209	0.36146	0.102592	rs67668930	7	RPS23P3	84695	intergenic	0.779	6	14	15	0	0	1
1:54580102:C:CT	rs36033513	1	54580102	CT	C	0.3706	0.000785343	0.558018	0.165183	0.142746	rs954878	1	TCEANC2	1909	intergenic	1.661	NA	5	15	1	0	1
14:50858641:A:G	rs66467858	14	50858641	G	A	0.1404	0.000794281	0.700602	0.207586	0.157344	rs12896268	19	CDKL1	0	intronic	6.077	6	4	15	1	1	1
14:50858861:C:T	rs67560971	14	50858861	C	T	0.1402	0.000794443	0.702002	0.208004	0.15752	rs12896268	19	CDKL1	0	intronic	4.054	5	4	15	1	1	1
23:81393315:A:G	rs35979275	23	81393315	G	A	0.2033	0.000808264	0.490339	0.145497	0.464786	rs73241354	22	RNU6-974P	136538	intergenic	3.886	7	9	15	0	0	1
14:50863608:G:T	rs10136664	14	50863608	G	T	0.1589	0.000824552	0.698131	0.207501	0.13619	rs12896268	19	CDKL1	0	intronic	9.202	4	1	1	1	1	1
23:81575643:G:T	rs4828452	23	81575643	G	T	0.1945	0.000825714	0.495742	0.147364	0.459579	rs73241354	22	RP4-581F12.1	177474	intergenic	0.121	7	7	15	0	0	1
14:50863510:A:G	rs10136559	14	50863510	G	A	0.1585	0.000830294	0.697773	0.207516	0.136086	rs12896268	19	CDKL1	0	intronic	8.438	4	1	1	1	1	1
1:54581869:C:T	rs13373789	1	54581869	C	T	0.375	0.000830404	0.554452	0.164894	0.151676	rs954878	1	TCEANC2	3676	intergenic	0.837	4	5	15	1	0	1
11:117541521:A:T	rs688790	11	117541521	T	A	0.04133	0.000830627	1.04972	0.312195	0.518367	rs658274	15	DSCAML1	0	intronic	0.283	3a	2	15	1	0	0
11:117541577:A:G	rs688415	11	117541577	A	G	0.04133	0.000831197	1.04967	0.312197	0.518367	rs658274	15	DSCAML1	0	intronic	13.71	2b	2	15	1	0	0
3:14396062:A:C	rs1825163	3	14396062	A	C	0.2402	0.000861421	0.590017	0.176014	0.229942	rs13091718	5	RP11-536I6.1	1993	intergenic	0.444	7	5	15	1	0	1
17:10009297:A:G	rs4791927	17	10009297	G	A	0.2129	0.000865144	-0.592042	0.176682	0.125321	rs916582	20	GAS7	0	intronic	0.363	6	2	15	1	0	0
4:67128141:A:T	rs67267562	4	67128141	A	T	0.09165	0.000874095	-1.09162	0.326056	0.233729	rs67668930	7	MIR1269A	14400	intergenic	1.225	7	9	15	1	0	1
14:51177002:C:T	rs12587877	14	51177002	C	T	0.4675	0.000887497	-0.520382	0.155633	0.123722	rs12896268	19	ZFP64P1	4772	intergenic	0.476	7	14	15	1	1	1
4:67128705:A:G	rs34626813	4	67128705	A	G	0.09125	0.000887512	-1.09057	0.32616	0.235101	rs67668930	7	MIR1269A	13836	intergenic	2.923	5	9	15	1	0	1
23:81430972:A:T	rs35295221	23	81430972	A	T	0.2023	0.000921944	0.489162	0.14677	0.459527	rs73241354	22	RNU6-974P	174195	intergenic	8.42	6	9	15	0	0	1
1:173292797:A:G	rs11583261	1	173292797	A	G	0.07109	0.000930654	-0.911111	0.273593	0.530309	rs72724954	3	RP11-296O14.1	28030	intergenic	7.421	7	5	15	1	0	1
14:50857973:C:T	rs1538904	14	50857973	T	C	0.2424	0.000933912	-0.60125	0.1806	0.19618	rs12896268	19	CDKL1	0	intronic	6.783	7	4	15	1	1	1
14:50880477:C:T	rs8005104	14	50880477	T	C	0.2113	0.000945711	-0.596346	0.17932	0.111604	rs12896268	19	CDKL1	0	intergenic	3.959	6	4	5	1	1	1
1:54566310:A:G	rs6694397	1	54566310	G	A	0.3047	0.000961996	-0.560925	0.168916	0.681015	rs954878	1	TCEANC2	0	upstream	4.075	1f	4	5	1	1	1
3:14393801:A:C	rs999968	3	14393801	A	C	0.2334	0.000972047	0.583789	0.175958	0.228364	rs13091718	5	RP11-536I6.1	0	ncRNA_exonic	2.66	NA	2	15	1	0	1
1:54482306:G:T	rs1537322	1	54482306	G	T	0.496	0.00097692	-0.535543	0.161486	0.144636	rs954878	1	LDLRAD1	0	intronic	8.213	4	2	15	1	1	1
12:41126732:A:G	rs74896189	12	41126732	G	A	0.03494	0.000998939	-1.76791	0.534116	0.133315	rs147468045	16	CNTN1	0	intronic	0.26	7	5	15	1	0	1
3:14389914:C:G	rs4685138	3	14389914	G	C	0.229	0.00100932	0.580632	0.175576	0.237339	rs13091718	5	RP11-536I6.1	36	downstream	1.109	7	5	15	1	0	1
1:54482523:G:T	rs1537323	1	54482523	T	G	0.497	0.00101616	-0.533224	0.161335	0.143515	rs954878	1	LDLRAD1	0	intronic	2.743	4	2	15	1	1	1
6:110756037:C:T	rs221719	6	110756037	C	T	0.1522	0.00102143	-1.00896	0.305411	0.336855	rs221720	9	SLC22A16	0	intronic	0.006	NA	4	15	1	1	1
3:14396127:A:G	rs1384107	3	14396127	A	G	0.2632	0.00103719	0.579782	0.175733	0.229448	rs13091718	5	RP11-536I6.1	2058	intergenic	2.241	6	5	15	1	0	1
1:54572175:C:T	rs12046178	1	54572175	T	C	0.3059	0.00104371	-0.55753	0.169081	0.680976	rs954878	1	TCEANC2	0	downstream	6.06	7	5	15	1	1	1
17:10082569:C:G	rs1986505	17	10082569	C	G	0.4932	0.00104477	-0.518911	0.157383	0.128237	rs8081398	20	GAS7	0	intronic	0.226	2b	5	15	1	0	1
3:14392500:A:T	rs7650740	3	14392500	T	A	0.2324	0.001046	0.579906	0.1759	0.229118	rs13091718	5	RP11-536I6.1	0	ncRNA_exonic	4.841	5	5	15	1	0	1
1:54482915:A:G	rs11804837	1	54482915	G	A	0.4948	0.00104752	-0.530526	0.160943	0.143781	rs954878	1	LDLRAD1	0	intronic	5.08	5	2	15	1	1	1
3:14394752:A:G	rs6442446	3	14394752	G	A	0.2376	0.00104898	0.579794	0.17591	0.234192	rs13091718	5	RP11-536I6.1	683	upstream	2.236	5	5	15	1	0	1
14:50860957:A:G	rs11570788	14	50860957	A	G	0.1404	0.00105783	0.684906	0.207953	0.15688	rs12896268	19	CDKL1	0	intronic	0.13	NA	1	15	1	1	1
23:81400325:C:T	rs77017268	23	81400325	T	C	0.2294	0.0010837	0.478215	0.145504	0.395706	rs73241354	22	RNU6-974P	143548	intergenic	2.877	7	9	15	0	0	1
1:54547351:A:AGTC	rs34379369	1	54547351	AGTC	A	0.2865	0.00110769	-0.550715	0.167885	0.738766	rs954878	1	TCEANC2	0	intronic	13.4	NA	5	5	1	1	1
23:81142108:C:T	rs12840187	23	81142108	C	T	0.146	0.001111	0.479425	0.146191	0.644307	rs73241354	22	RNU6-974P	114560	intergenic	0.707	6	9	15	0	0	1
17:10082256:A:G	rs4128646	17	10082256	G	A	0.4936	0.00112169	-0.515037	0.157182	0.127007	rs8081398	20	GAS7	0	intronic	4.536	7	5	15	1	0	1
1:54552911:A:G	rs12033409	1	54552911	G	A	0.2875	0.00112689	-0.549866	0.16788	0.742347	rs954878	1	TCEANC2	0	intronic	8.318	6	4	5	1	1	1
1:54563239:A:T	rs6672905	1	54563239	A	T	0.2985	0.00115365	-0.538068	0.164618	0.716125	rs954878	1	TCEANC2	0	UTR3	3.002	7	4	5	1	1	1
14:50854916:A:G	rs60738271	14	50854916	A	G	0.3528	0.00120988	0.541339	0.16632	0.462073	rs12896268	19	CDKL1	0	intronic	5.046	5	5	15	1	0	1
17:10044423:C:T	rs7219401	17	10044423	T	C	0.1893	0.00121607	-0.6681	0.205359	0.111479	rs12935988	20	GAS7	0	intronic	0.072	6	5	15	1	0	1
17:10044455:A:G	rs7215255	17	10044455	A	G	0.1893	0.00123491	-0.666647	0.205194	0.111479	rs12935988	20	GAS7	0	intronic	2.182	6	5	15	1	0	1
3:14384343:G:T	rs6442445	3	14384343	G	T	0.3387	0.00123693	0.548147	0.168744	0.125223	rs13091718	5	RP11-536I6.1	5607	intergenic	2.068	5	5	15	1	0	1
17:10043919:A:ATG	rs10564105	17	10043919	ATG	A	0.1891	0.00124146	-0.662181	0.203916	0.113457	rs12935988	20	GAS7	0	intronic	1.142	NA	5	15	1	0	1
6:110750148:C:T	rs17578180	6	110750148	C	T	0.0625	0.00124583	-1.14014	0.351213	0.312691	rs221720	9	SLC22A16	0	intronic	7.277	7	5	15	1	0	1
3:14384894:C:T	rs1552154	3	14384894	C	T	0.3385	0.00126814	0.547146	0.168813	0.12457	rs13091718	5	RP11-536I6.1	5056	intergenic	2.808	5	5	15	1	0	1
1:54526545:C:T	rs35191207	1	54526545	C	T	0.2879	0.00129922	-0.543007	0.167901	0.739356	rs954878	1	TCEANC2	0	intronic	0.29	7	5	5	1	1	1
17:10043955:A:G	rs7212677	17	10043955	G	A	0.1889	0.00130389	-0.655293	0.202686	0.113666	rs12935988	20	GAS7	0	intronic	0.931	7	5	15	1	0	1
6:110754407:C:T	rs76861443	6	110754407	C	T	0.01258	0.00131423	-1.4079	0.435782	0.119995	rs221720	9	SLC22A16	0	intronic	4.621	5	5	15	1	0	1
1:54484682:A:G	rs7540270	1	54484682	A	G	0.4728	0.00132764	-0.515725	0.159777	0.113917	rs954878	1	LDLRAD1	825	upstream	0.159	5	5	15	1	1	1
17:10083590:A:G	rs36049249	17	10083590	G	A	0.496	0.00134653	-0.505898	0.156933	0.122751	rs8081398	20	GAS7	0	intronic	1.922	7	5	15	1	0	1
4:116079000:C:T	rs4834454	4	116079000	C	T	0.3413	0.00134781	-0.67081	0.208108	0.319572	rs59230330	8	MRPS33P3	14540	intergenic	0.043	6	5	15	1	0	1
4:116079748:A:T	rs2155519	4	116079748	A	T	0.3413	0.00135785	-0.670271	0.208081	0.319572	rs59230330	8	MRPS33P3	15288	intergenic	0.948	5	5	15	1	0	1
4:14173915:C:G	rs200801939	4	14173915	G	C	0.3409	0.00136538	0.632792	0.196544	0.168051	rs1968315	6	RP11-669M16.1	0	ncRNA_intronic	1.6	7	1	15	1	0	1
1:54484482:C:T	rs914720	1	54484482	C	T	0.4734	0.00136978	-0.523819	0.162745	0.181007	rs954878	1	LDLRAD1	625	upstream	8.366	7	5	15	1	1	1
1:54487125:A:G	rs6696554	1	54487125	A	G	0.4986	0.00137419	-0.528361	0.164204	0.139111	rs954878	1	LDLRAD1	3268	intergenic	2.622	7	5	15	1	1	1
3:14383905:C:T	rs7629140	3	14383905	C	T	0.3409	0.00138394	0.541281	0.168328	0.123002	rs13091718	5	RP11-536I6.1	6045	intergenic	2.997	4	5	15	1	0	1
1:54487691:A:C	rs35299391	1	54487691	A	C	0.492	0.00138465	-0.528037	0.164217	0.131059	rs954878	1	LDLRAD1	3834	intergenic	0.104	6	5	15	1	1	1
3:14360710:A:T	rs2035409	3	14360710	A	T	0.48	0.00139253	-0.49962	0.15546	0.299542	rs13091718	5	RP11-536I6.2	15364	intergenic	1.214	6	5	14	1	0	1
14:50856381:C:T	rs73277671	14	50856381	T	C	0.1701	0.00139487	0.604283	0.188055	0.199944	rs12896268	19	CDKL1	0	intronic	4.757	6	5	15	1	1	1
17:10083402:G:T	rs11658912	17	10083402	T	G	0.4964	0.00139839	-0.503289	0.156662	0.125586	rs8081398	20	GAS7	0	intronic	3.157	5	5	15	1	0	1
3:14357085:C:G	rs6798582	3	14357085	G	C	0.4864	0.00141346	-0.499917	0.155764	0.299667	rs13091718	5	RP11-536I6.2	11739	intergenic	2.362	5	5	14	1	0	1
4:67347879:A:G	rs17087196	4	67347879	G	A	0.1124	0.00142151	-1.11897	0.348831	0.134703	rs67668930	7	RPS23P3	50639	intergenic	8.325	5	7	15	0	0	1
4:67347363:C:G	rs73825782	4	67347363	C	G	0.1106	0.00142801	-1.11867	0.348881	0.136124	rs67668930	7	RPS23P3	50123	intergenic	0.191	6	15	15	0	0	1
4:67346328:C:T	rs17087195	4	67346328	T	C	0.1108	0.00142826	-1.11863	0.348876	0.137345	rs67668930	7	RPS23P3	49088	intergenic	9.476	7	15	15	1	0	1
19:13697037:C:T	rs10403542	19	13697037	T	C	0.3375	0.00143252	-0.652208	0.203464	0.349554	rs7252743	21	CACNA1A	0	intronic	0.258	7	5	15	1	0	1
6:110783121:C:T	rs6928918	6	110783121	T	C	0.127	0.00144356	-1.01659	0.317361	0.451552	rs221720	9	SLC22A16	0	intronic	2.25	7	8	9	1	1	1
23:81733988:C:T	rs55784209	23	81733988	C	T	0.1943	0.00145454	0.470058	0.146846	0.426513	rs73241354	22	RP4-581F12.1	19129	intergenic	1.815	7	9	15	1	0	1
11:117544475:C:T	rs686977	11	117544475	T	C	0.04014	0.00145484	0.993943	0.310513	0.498897	rs658274	15	DSCAML1	0	intronic	13.06	5	2	15	1	0	0
4:67348581:C:T	rs17087198	4	67348581	T	C	0.1108	0.00146867	-1.1159	0.348917	0.137345	rs67668930	7	RPS23P3	51341	intergenic	1.245	7	15	15	0	0	1
1:173274866:A:T	rs952812	1	173274866	T	A	0.08586	0.0014756	-0.968129	0.302843	0.413412	rs72724954	3	snoU13	24556	intergenic	4.046	6	5	15	1	0	1
3:14393451:C:T	rs999970	3	14393451	T	C	0.3251	0.00147825	0.563517	0.176304	0.117914	rs13091718	5	RP11-536I6.1	0	ncRNA_exonic	3.196	NA	2	15	1	0	1
23:81676039:A:G	rs4828501	23	81676039	G	A	0.1951	0.00148174	0.467487	0.146292	0.432737	rs73241354	22	RP4-581F12.1	77078	intergenic	0.669	6	9	15	0	0	1
3:14404931:C:T	rs7650038	3	14404931	T	C	0.2568	0.00149297	0.559859	0.17532	0.142659	rs13091718	5	RP11-536I6.1	10862	intergenic	1.489	5	5	15	1	1	1
14:51179435:A:C	rs12589302	14	51179435	C	A	0.4782	0.00149906	-0.508765	0.159379	0.153537	rs12896268	19	NIN	7045	intergenic	1.652	5	5	15	1	1	1
1:54586538:C:T	rs12065056	1	54586538	T	C	0.4417	0.00168623	-0.518546	0.164235	0.167928	rs954878	1	TCEANC2	8345	intergenic	5.228	4	5	15	1	0	1
14:50863560:A:G	rs10136571	14	50863560	G	A	0.1713	0.00169515	0.651489	0.206444	0.15106	rs12896268	19	CDKL1	0	intronic	8.597	4	1	1	1	1	1
4:67376464:C:T	rs7693003	4	67376464	T	C	0.1464	0.00171044	-1.06231	0.336909	0.143825	rs67668930	7	RPS23P3	79224	intergenic	1.78	6	9	15	0	0	1
23:81209703:A:C	rs12832647	23	81209703	A	C	0.2003	0.00172584	0.454102	0.14414	0.426731	rs73241354	22	RNU6-974P	46965	intergenic	4.692	7	9	15	1	0	1
1:54501826:C:G	rs12041928	1	54501826	G	C	0.2855	0.00173307	-0.531718	0.168843	0.727961	rs954878	1	TMEM59	0	intronic	0.043	6	4	4	1	1	1
1:54487596:A:G	rs35719463	1	54487596	G	A	0.4984	0.0017484	-0.516885	0.16427	0.143409	rs954878	1	LDLRAD1	3739	intergenic	1.941	7	5	15	1	1	1
1:54507195:A:G	rs34028311	1	54507195	A	G	0.2855	0.00175761	-0.530285	0.168613	0.727961	rs954878	1	TMEM59	0	intronic	5.822	6	4	4	1	1	1
7:9426551:C:T	rs4725191	7	9426551	T	C	0.1563	0.00176248	-0.645371	0.20526	0.126217	rs77755643	10	AC079756.1	207695	intergenic	1.63	7	9	15	0	0	1
3:14387918:A:G	rs749856	3	14387918	G	A	0.3399	0.00176474	0.529939	0.168567	0.124036	rs13091718	5	RP11-536I6.1	2032	intergenic	1.247	NA	5	15	1	0	1
3:14388253:A:G	rs4685136	3	14388253	A	G	0.3415	0.00176569	0.529909	0.168567	0.122786	rs13091718	5	RP11-536I6.1	1697	intergenic	3.569	5	5	15	1	0	1
3:14388583:C:G	rs11128695	3	14388583	G	C	0.3379	0.00176574	0.529907	0.168566	0.122676	rs13091718	5	RP11-536I6.1	1367	intergenic	3.464	5	5	15	1	0	1
1:54588110:C:T	rs7516442	1	54588110	C	T	0.3351	0.00177991	-0.522435	0.166315	0.60643	rs954878	1	TCEANC2	9917	intergenic	0.525	1f	5	15	1	0	1
14:50854706:C:T	rs112724011	14	50854706	C	T	0.1532	0.00178706	0.61757	0.196676	0.187025	rs12896268	19	CDKL1	0	intronic	3.055	6	5	15	1	1	1
12:41093632:C:G	rs11177887	12	41093632	G	C	0.05172	0.00179475	-1.36983	0.436426	0.100903	rs147468045	16	CNTN1	0	intronic	1.772	5	5	15	1	0	0
17:10081647:A:AT	rs34731655	17	10081647	A	AT	0.4922	0.00179592	-0.496114	0.158071	0.128144	rs8081398	20	GAS7	0	intronic	1.024	NA	2	7	1	0	1
23:81697156:C:T	rs1883439	23	81697156	C	T	0.1917	0.00179854	0.461074	0.146927	0.419479	rs73241354	22	RP4-581F12.1	55961	intergenic	1.716	7	9	15	0	0	0
1:54496344:C:T	rs66521714	1	54496344	C	T	0.2855	0.00183269	-0.527825	0.1685	0.727961	rs954878	1	TMEM59	1002	intergenic	0.288	6	4	5	1	1	1
1:54498754:C:T	rs34370448	1	54498754	C	T	0.2855	0.00183327	-0.527807	0.1685	0.727961	rs954878	1	TMEM59	0	intronic	2.157	6	4	4	1	1	1
4:116001098:C:T	rs72667319	4	116001098	T	C	0.2019	0.00183787	-0.723652	0.231077	0.825253	rs59230330	8	NDST4	0	intronic	2.307	6	14	15	1	0	1
4:67382811:A:G	rs1022126	4	67382811	G	A	0.1474	0.0018606	-1.04431	0.333862	0.145834	rs67668930	7	RPS23P3	85571	intergenic	12.72	NA	14	15	0	0	1
4:14255076:G:T	rs7691835	4	14255076	T	G	0.4127	0.00187196	0.515568	0.164922	0.23201	rs1968315	6	RP11-669M16.1	10638	intergenic	5.599	6	5	15	1	1	1
3:14388278:G:T	rs4685137	3	14388278	T	G	0.3401	0.0018745	0.525765	0.168205	0.124474	rs13091718	5	RP11-536I6.1	1672	intergenic	0.819	3a	5	15	1	0	1
6:110747937:C:T	rs147278440	6	110747937	C	T	0.0643	0.00187814	-1.11826	0.357825	0.299966	rs221720	9	SLC22A16	0	intronic	0.449	6	5	15	1	1	1
17:10081621:A:G	rs17810641	17	10081621	A	G	0.493	0.0018899	-0.493148	0.157894	0.12835	rs8081398	20	GAS7	0	intronic	9.99	6	2	7	1	0	1
23:81243550:A:T	rs35178693	23	81243550	T	A	0.2031	0.00190211	0.449395	0.143975	0.436305	rs73241354	22	RNU6-974P	13118	intergenic	0.394	7	9	15	1	0	1
8:69972182:A:G	rs1965697	8	69972182	G	A	0.08446	0.00192097	-0.736699	0.236244	0.105836	rs2912504	13	RP11-600K15.1	0	ncRNA_intronic	0.242	6	5	15	1	0	1
23:81298475:A:C	rs4457474	23	81298475	C	A	0.2023	0.00192884	0.449021	0.144048	0.444007	rs73241354	22	RNU6-974P	41698	intergenic	0.753	7	9	15	1	0	1
17:10082799:C:CTAAGA	rs10679926	17	10082799	C	CTAAGA	0.4966	0.00193168	-0.490204	0.157282	0.126707	rs8081398	20	GAS7	0	intronic	0.628	NA	2	15	1	0	1
14:50861157:C:T	rs11157741	14	50861157	T	C	0.233	0.00198273	-0.564237	0.181493	0.165649	rs12896268	19	CDKL1	0	intronic	3.052	3a	1	15	1	1	1
4:67381939:C:T	rs2048390	4	67381939	C	T	0.1474	0.00201058	-1.03764	0.334219	0.145834	rs67668930	7	RPS23P3	84699	intergenic	4.904	NA	14	15	0	0	1
3:14387154:C:T	rs749855	3	14387154	C	T	0.3361	0.00202691	0.523266	0.168674	0.1179	rs13091718	5	RP11-536I6.1	2796	intergenic	4.303	5	5	15	1	0	1
7:9531423:G:T	rs73050306	7	9531423	T	G	0.02855	0.00203124	-1.06229	0.342498	0.535967	rs77755643	10	AC079756.1	102823	intergenic	1.33	7	9	15	0	0	1
1:54557290:C:T	rs12046885	1	54557290	C	T	0.3037	0.00206912	-0.522511	0.16877	0.674539	rs954878	1	TCEANC2	0	intronic	12.3	6	4	5	1	1	1
7:9425606:C:T	rs62437795	7	9425606	T	C	0.1599	0.00207923	-0.635709	0.20543	0.123117	rs77755643	10	AC079756.1	208640	intergenic	7.179	6	9	15	0	0	1
7:9426112:C:T	rs4555986	7	9426112	T	C	0.1599	0.00207957	-0.635716	0.205435	0.123117	rs77755643	10	AC079756.1	208134	intergenic	11.1	7	9	15	0	0	1
7:9426064:C:T	rs4555985	7	9426064	T	C	0.1599	0.00208074	-0.635674	0.205433	0.123117	rs77755643	10	AC079756.1	208182	intergenic	2.701	7	9	15	0	0	1
12:41094092:A:G	rs140179226	12	41094092	G	A	0.05172	0.00209736	-1.35552	0.438408	0.100903	rs147468045	16	CNTN1	0	intronic	2.243	6	5	15	1	0	0
3:14359685:A:G	rs6442441	3	14359685	A	G	0.487	0.00218454	-0.479044	0.155556	0.29723	rs13091718	5	RP11-536I6.2	14339	intergenic	4.541	5	5	15	1	0	1
7:9418689:C:T	rs117356820	7	9418689	C	T	0.01418	0.00219388	-1.3414	0.435765	0.655285	rs77755643	10	AC079756.1	215557	intergenic	2.302	7	9	15	0	0	1
7:9500546:A:G	rs140123882	7	9500546	A	G	0.03894	0.00220122	-0.931684	0.302764	0.526658	rs77755643	10	AC079756.1	133700	intergenic	3.393	7	9	15	0	0	1
23:81009923:C:CA	rs150665414	23	81009923	C	CA	0.07049	0.00222546	0.596592	0.194081	0.578389	rs73241354	22	XXyac-YR12DB5.1	153117	intergenic	1.411	NA	9	15	0	0	1
4:116000235:C:T	rs72667318	4	116000235	C	T	0.1991	0.00223813	-0.715395	0.23286	0.807546	rs59230330	8	NDST4	0	intronic	0.137	7	14	15	1	0	1
17:10058643:C:CT	rs34734294	17	10058643	CT	C	0.4465	0.00232965	-0.531551	0.173709	0.121416	rs8081398	20	GAS7	0	intronic	0.832	NA	5	15	1	0	1
1:54513827:A:T	rs914722	1	54513827	T	A	0.3101	0.00233341	-0.517369	0.169102	0.620066	rs954878	1	TMEM59	0	intronic	0.763	1f	3	5	1	1	1
1:54491225:C:T	rs67058314	1	54491225	C	T	0.2861	0.00234782	-0.514149	0.168153	0.724021	rs954878	1	RP4-758J24.5	1130	intergenic	4.062	7	5	15	1	1	1
23:81180501:C:T	rs17218533	23	81180501	C	T	0.2015	0.00244266	0.437134	0.143533	0.430826	rs73241354	22	RNU6-974P	76167	intergenic	1.218	6	9	15	0	0	1
23:81181269:C:T	rs12848340	23	81181269	T	C	0.2025	0.00244627	0.43787	0.143797	0.433207	rs73241354	22	RNU6-974P	75399	intergenic	3.345	5	9	15	0	0	1
3:14398872:C:T	rs1370094	3	14398872	C	T	0.222	0.00245118	0.56223	0.184673	0.187819	rs13091718	5	RP11-536I6.1	4803	intergenic	2.628	NA	5	15	1	0	1
23:81160041:C:T	rs78735197	23	81160041	T	C	0.2031	0.00245995	0.437593	0.143786	0.437686	rs73241354	22	RNU6-974P	96627	intergenic	9.618	7	9	15	0	0	1
7:9501103:C:G	rs115619836	7	9501103	C	G	0.1188	0.00249239	-0.985866	0.324368	0.119452	rs77755643	10	AC079756.1	133143	intergenic	1.442	7	9	15	0	0	1
1:54500362:A:G	rs10888831	1	54500362	G	A	0.3103	0.00251532	-0.513109	0.168979	0.619379	rs954878	1	TMEM59:AL353898.2	00:00:00	ncRNA_exonic	0.082	7	4	4	1	1	1
4:14250959:A:G	rs10470841	4	14250959	A	G	0.2979	0.00253283	0.652182	0.214929	0.261978	rs1968315	6	RP11-669M16.1	6521	intergenic	4.177	6	5	15	1	0	1
8:69946756:A:G	rs2912503	8	69946756	G	A	0.1771	0.0025552	-0.669955	0.220983	0.50748	rs2912504	13	RP11-600K15.1	0	ncRNA_intronic	1.611	5	5	15	1	0	1
4:67188980:C:T	rs12331987	4	67188980	C	T	0.4075	0.00256544	-0.572574	0.188939	0.179679	rs67668930	7	MIR1269A	46333	intergenic	2.127	6	9	15	1	0	1
4:67175469:A:G	rs9997587	4	67175469	G	A	0.4077	0.00260729	-0.572079	0.189086	0.180535	rs67668930	7	MIR1269A	32822	intergenic	0.37	6	9	15	1	0	1
7:9427299:G:T	rs55721047	7	9427299	G	T	0.1755	0.00262685	-0.600818	0.198736	0.112286	rs77755643	10	AC079756.1	206947	intergenic	0.429	6	9	9	0	0	1
1:54588056:C:G	rs10888833	1	54588056	G	C	0.4249	0.00264457	-0.491352	0.162639	0.134221	rs954878	1	TCEANC2	9863	intergenic	0.966	4	5	15	1	0	1
3:14405954:G:T	rs1550161	3	14405954	T	G	0.2754	0.00264646	0.528032	0.174793	0.114667	rs13091718	5	RP11-536I6.1	11885	intergenic	1.333	5	2	15	1	0	1
4:67167337:A:T	rs10009259	4	67167337	T	A	0.3608	0.00267301	-0.570344	0.188992	0.145839	rs67668930	7	MIR1269A	24690	intergenic	0.38	7	15	15	1	0	1
1:54480398:C:G	rs10158824	1	54480398	G	C	0.4788	0.00271358	-0.480617	0.159505	0.11534	rs954878	1	LDLRAD1	0	intronic	0.832	5	5	15	1	1	1
7:108100045:A:T	rs12536929	7	108100045	T	A	0.1256	0.00273393	-0.760069	0.252442	0.131374	rs141901173	11	NRCAM	2883	intergenic	2.097	7	5	14	1	0	1
4:116156306:A:G	rs72669527	4	116156306	A	G	0.262	0.00274409	-0.601423	0.199827	0.587408	rs59230330	8	MRPS33P3	91846	intergenic	2.641	6	2	15	0	0	1
23:81701532:C:T	rs73224717	23	81701532	C	T	0.1885	0.00281493	0.44209	0.147274	0.381381	rs73241354	22	RP4-581F12.1	51585	intergenic	1.469	7	9	15	0	0	0
4:67129620:C:T	rs6854402	4	67129620	T	C	0.4034	0.00285015	-0.567684	0.189356	0.17586	rs67668930	7	MIR1269A	12921	intergenic	3.249	6	9	15	1	0	1
3:14398689:C:T	rs4234523	3	14398689	C	T	0.2208	0.00289303	0.552904	0.184712	0.190198	rs13091718	5	RP11-536I6.1	4620	intergenic	1.66	5	5	15	1	0	1
3:14406623:C:T	rs1550158	3	14406623	T	C	0.4339	0.00298291	0.495178	0.165954	0.24236	rs13091718	5	RP11-536I6.1	12554	intergenic	1.118	5	5	15	1	0	1
4:67189963:A:C	rs7672231	4	67189963	C	A	0.3998	0.00301638	-0.560776	0.188158	0.177465	rs67668930	7	MIR1269A	47316	intergenic	0.284	6	9	15	1	0	1
7:108099837:A:G	rs10953573	7	108099837	A	G	0.133	0.00304338	-0.75366	0.253113	0.12159	rs141901173	11	NRCAM	2675	intergenic	1.379	6	5	14	1	0	1
4:67178553:C:G	rs6833057	4	67178553	C	G	0.3994	0.00304347	-0.561009	0.188412	0.175469	rs67668930	7	MIR1269A	35906	intergenic	2.417	7	7	15	1	0	1
2:119156908:G:T	rs12615777	2	119156908	G	T	0.3339	0.00307568	-0.631122	0.212194	0.117052	rs2422177	4	AC093901.1	212945	intergenic	0.037	5	5	15	0	0	1
13:54863194:C:T	rs4884954	13	54863194	C	T	0.3744	0.00308432	-0.529598	0.178112	0.105176	rs11619037	18	RPL13AP25	151644	intergenic	1.955	7	5	15	0	0	1
1:54588140:A:G	rs7528149	1	54588140	A	G	0.4193	0.00309509	-0.483466	0.162657	0.126916	rs954878	1	TCEANC2	9947	intergenic	9.519	5	5	15	1	0	1
3:14377469:C:T	rs9310445	3	14377469	C	T	0.2608	0.0031518	-0.482082	0.162502	0.101155	rs13091718	5	RP11-536I6.1	12481	intergenic	0.671	4	5	15	1	0	1
4:67186241:C:T	rs6820508	4	67186241	T	C	0.3936	0.00318971	-0.558133	0.188375	0.151805	rs67668930	7	MIR1269A	43594	intergenic	0.608	5	14	15	1	0	1
4:67191539:A:T	rs12643470	4	67191539	A	T	0.3938	0.00319199	-0.558167	0.188401	0.156414	rs67668930	7	MIR1269A	48892	intergenic	3.878	6	14	15	1	0	1
17:10077957:C:T	rs9911262	17	10077957	T	C	0.4355	0.00325299	-0.482504	0.163188	0.114775	rs8081398	20	GAS7	0	intronic	0.045	2b	5	15	1	0	1
7:108099789:A:G	rs10953572	7	108099789	A	G	0.1328	0.00328976	-0.747309	0.25305	0.1218	rs141901173	11	NRCAM	2627	intergenic	0.114	6	5	14	1	0	1
17:10076393:C:T	rs7222551	17	10076393	T	C	0.4449	0.00340082	-0.481606	0.163658	0.123727	rs8081398	20	GAS7	0	intronic	8.238	2b	2	15	1	0	1
17:10077007:C:T	rs6503291	17	10077007	T	C	0.4427	0.0034015	-0.481596	0.163658	0.123087	rs8081398	20	GAS7	0	intronic	1.874	2b	2	15	1	0	1
4:14286120:C:T	rs79891971	4	14286120	T	C	0.03894	0.00341354	0.960419	0.326497	0.101063	rs1968315	6	RP11-669M16.1	41682	intergenic	0.531	6	5	15	1	0	1
4:14276839:C:T	rs75363641	4	14276839	T	C	0.03854	0.00348342	0.959828	0.327007	0.100203	rs1968315	6	RP11-669M16.1	32401	intergenic	5.606	6	5	15	1	0	1
1:54480903:A:G	rs6691549	1	54480903	A	G	0.4201	0.00349363	-0.463297	0.157892	0.274313	rs954878	1	LDLRAD1	0	intronic	2.782	5	1	15	1	1	1
4:67158480:A:G	rs28771742	4	67158480	G	A	0.3958	0.00349477	-0.553401	0.188606	0.183603	rs67668930	7	MIR1269A	15833	intergenic	1.087	7	9	15	1	0	1
7:108100703:A:C	rs35687881	7	108100703	C	A	0.1268	0.00351773	-0.743858	0.253695	0.126323	rs141901173	11	NRCAM	3541	intergenic	0.836	2b	5	14	1	0	1
17:10077649:A:C	rs11078835	17	10077649	A	C	0.4403	0.00352601	-0.478027	0.163074	0.118705	rs8081398	20	GAS7	0	intronic	5.729	4	5	15	1	0	1
4:67124323:A:G	rs374432	4	67124323	G	A	0.3926	0.00360832	-0.643458	0.220056	0.163913	rs67668930	7	MIR1269A	18218	intergenic	0.551	NA	9	15	1	0	1
1:54487417:C:T	rs12047169	1	54487417	C	T	0.2674	0.00364365	-0.492721	0.168684	0.568735	rs954878	1	LDLRAD1	3560	intergenic	0.109	5	5	15	1	1	1
1:160375470:C:G	rs11265387	1	160375470	C	G	0.1002	0.00376868	-0.765943	0.263186	0.180659	rs77847479	2	VANGL2	0	intronic	5.079	5	4	5	1	1	1
7:9425807:G:T	rs74755111	7	9425807	T	G	0.1607	0.00384458	-0.593139	0.204254	0.122444	rs77755643	10	AC079756.1	208439	intergenic	1.909	6	9	15	0	0	1
12:78417123:C:T	rs2731417	12	78417123	T	C	0.2059	0.0038547	-0.541393	0.186488	0.178604	rs5799370	17	NAV3	0	intronic	7.511	6	4	15	1	0	1
4:115885600:C:T	rs279540	4	115885600	T	C	0.2165	0.00405617	-0.728969	0.252515	0.37929	rs59230330	8	NDST4	0	intronic	0.678	NA	7	15	1	0	1
1:54593401:C:CTT	rs67364158	1	54593401	CTT	C	0.3425	0.00406558	-0.481926	0.166982	0.578046	rs954878	1	CDCP2	5345	intergenic	2.084	NA	5	15	1	0	1
1:54595215:C:T	rs11586487	1	54595215	C	T	0.3421	0.00406785	-0.481905	0.166985	0.577934	rs954878	1	CDCP2	3531	intergenic	3.392	5	5	15	1	1	1
1:54593256:A:T	rs1572731	1	54593256	A	T	0.3425	0.00407353	-0.48174	0.166954	0.578046	rs954878	1	CDCP2	5490	intergenic	6.227	4	5	15	1	1	1
4:67127759:C:T	rs28871908	4	67127759	C	T	0.384	0.00408866	-0.546459	0.189461	0.172579	rs67668930	7	MIR1269A	14782	intergenic	0.703	7	9	15	1	0	1
4:67147383:C:G	rs13146824	4	67147383	C	G	0.3944	0.0040995	-0.541854	0.18792	0.180299	rs67668930	7	MIR1269A	4736	intergenic	0.056	6	9	15	1	0	1
4:67150671:G:T	rs13116406	4	67150671	G	T	0.394	0.00410938	-0.541707	0.187919	0.180513	rs67668930	7	MIR1269A	8024	intergenic	0.936	6	9	15	1	0	1
4:67151157:A:C	rs13124205	4	67151157	C	A	0.3944	0.00411619	-0.541375	0.187839	0.181208	rs67668930	7	MIR1269A	8510	intergenic	0.35	7	7	15	1	0	1
7:108221792:A:C	rs76631350	7	108221792	A	C	0.02037	0.00422022	-1.50101	0.522249	0.358319	rs141901173	11	DNAJB9	6497	intergenic	1.148	7	5	15	1	1	1
7:108222958:C:T	rs78612644	7	108222958	C	T	0.02037	0.0042335	-1.50047	0.522245	0.358319	rs141901173	11	DNAJB9	7663	intergenic	1.021	5	2	15	1	1	1
7:108220852:C:T	rs113960861	7	108220852	T	C	0.02057	0.00423605	-1.50037	0.522246	0.354716	rs141901173	11	DNAJB9	5557	intergenic	2.849	5	4	5	1	1	1
7:108222386:C:G	rs76156752	7	108222386	C	G	0.02037	0.00423936	-1.50024	0.522245	0.358319	rs141901173	11	DNAJB9	7091	intergenic	4.275	4	1	15	1	0	1
7:108220420:C:G	rs112871539	7	108220420	C	G	0.02077	0.00424021	-1.50021	0.522246	0.351179	rs141901173	11	DNAJB9	5125	intergenic	5.375	5	4	8	1	1	1
4:67160442:C:T	rs13151560	4	67160442	C	T	0.3968	0.00425594	-0.542104	0.188793	0.18363	rs67668930	7	MIR1269A	17795	intergenic	2.252	5	7	15	1	0	1
4:67142620:A:G	rs73239138	4	67142620	G	A	0.3942	0.00429073	-0.539596	0.188091	0.179247	rs67668930	7	MIR1269A	0	ncRNA_exonic	0.441	7	9	15	1	0	1
4:67142001:A:G	rs977772	4	67142001	A	G	0.394	0.0042953	-0.538973	0.187896	0.178447	rs67668930	7	MIR1269A	540	upstream	0.015	NA	9	15	1	0	1
4:116000339:C:T	rs554772	4	116000339	C	T	0.2452	0.004386	-0.643936	0.225016	0.629971	rs59230330	8	NDST4	0	intronic	2.649	NA	14	15	1	0	1
4:115992133:C:T	rs515070	4	115992133	C	T	0.2746	0.00439128	-0.644076	0.225095	0.50976	rs59230330	8	NDST4	0	intronic	3.087	NA	9	15	1	0	1
4:115996302:G:T	rs536511	4	115996302	G	T	0.244	0.0044137	-0.643371	0.224978	0.636411	rs59230330	8	NDST4	0	intronic	0.162	NA	14	15	1	0	1
4:115996654:A:G	rs486022	4	115996654	G	A	0.247	0.00441515	-0.643344	0.224977	0.624323	rs59230330	8	NDST4	0	intronic	3.238	NA	14	15	1	0	1
4:115993406:A:C	rs693155	4	115993406	A	C	0.2466	0.00442183	-0.643233	0.224976	0.623246	rs59230330	8	NDST4	0	intronic	1.865	NA	14	15	1	0	1
4:115986385:C:T	rs526459	4	115986385	C	T	0.244	0.00442262	-0.643466	0.225062	0.636411	rs59230330	8	NDST4	0	intronic	3.07	NA	9	15	1	0	1
4:115993464:C:T	rs7671429	4	115993464	T	C	0.244	0.00442494	-0.643168	0.224971	0.636411	rs59230330	8	NDST4	0	intronic	0.939	6	14	15	1	0	1
4:67161910:A:C	rs4619949	4	67161910	A	C	0.3966	0.00442519	-0.539885	0.188845	0.182575	rs67668930	7	MIR1269A	19263	intergenic	1.967	6	9	15	1	0	1
4:115999236:A:T	rs475441	4	115999236	T	A	0.2468	0.00442631	-0.643149	0.224973	0.624589	rs59230330	8	NDST4	0	intronic	1.524	6	14	15	1	0	1
4:115999383:C:G	rs474314	4	115999383	G	C	0.2468	0.00442681	-0.643137	0.224971	0.624589	rs59230330	8	NDST4	0	intronic	8.887	6	14	15	1	0	1
4:116151157:G:T	rs10029472	4	116151157	T	G	0.4263	0.00445937	-0.558115	0.195392	0.174849	rs59230330	8	MRPS33P3	86697	intergenic	0.274	5	5	15	0	0	1
3:14383816:A:G	rs7639399	3	14383816	A	G	0.4535	0.00447	-0.456412	0.159829	0.257373	rs13091718	5	RP11-536I6.1	6134	intergenic	2.816	3a	5	15	1	0	1
3:14383731:C:G	rs6442444	3	14383731	C	G	0.4515	0.00450501	-0.456243	0.159911	0.253791	rs13091718	5	RP11-536I6.1	6219	intergenic	3.461	5	5	15	1	0	1
4:115901409:G:T	rs279517	4	115901409	G	T	0.219	0.00450902	-0.725397	0.254274	0.371753	rs59230330	8	NDST4	0	intronic	1.33	NA	9	15	1	0	1
4:67135984:C:G	rs72641631	4	67135984	G	C	0.3938	0.00459585	-0.535664	0.188174	0.179211	rs67668930	7	MIR1269A	6557	intergenic	2.135	5	9	15	1	0	1
3:14381214:A:T	rs12639032	3	14381214	T	A	0.4319	0.00462394	-0.457058	0.160671	0.654902	rs13091718	5	RP11-536I6.1	8736	intergenic	6.892	5	5	15	1	0	1
14:50729398:A:G	rs8004516	14	50729398	G	A	0.2776	0.00466181	-0.503462	0.177148	0.109919	rs12896268	19	L2HGDH	0	intronic	3.995	6	4	5	1	1	1
14:50727194:A:C	rs8013339	14	50727194	A	C	0.278	0.00466245	-0.503336	0.177107	0.109646	rs12896268	19	L2HGDH	0	intronic	4.238	5	4	5	1	1	1
4:115909768:C:T	rs1837802	4	115909768	C	T	0.2161	0.00467508	-0.722327	0.254241	0.37343	rs59230330	8	NDST4	0	intronic	0.628	NA	14	15	1	0	1
4:115895789:A:G	rs279520	4	115895789	A	G	0.2169	0.00469324	-0.722398	0.254378	0.375513	rs59230330	8	NDST4	0	intronic	0.632	NA	7	15	1	0	1
4:14196541:C:T	rs16889813	4	14196541	C	T	0.08327	0.00470091	1.31661	0.463704	0.359852	rs1968315	6	RP11-669M16.1	0	ncRNA_intronic	0.344	6	9	15	1	0	1
4:14212995:C:T	rs146707512	4	14212995	C	T	0.08147	0.00470115	1.3166	0.463705	0.359116	rs1968315	6	RP11-669M16.1	0	ncRNA_intronic	0.663	7	9	15	1	0	1
13:55019796:C:T	rs11616907	13	55019796	C	T	0.04233	0.00470659	-0.893083	0.314583	0.168138	rs11619037	18	RPL13AP25	4345	intergenic	0.438	5	9	15	1	0	1
4:14209589:G:T	rs12504046	4	14209589	T	G	0.08147	0.00471414	1.31628	0.463737	0.359116	rs1968315	6	RP11-669M16.1	0	ncRNA_intronic	3.233	6	14	15	1	0	1
1:54591802:G:GA	rs11455385	1	54591802	GA	G	0.4904	0.00472201	-0.461449	0.162603	0.250233	rs954878	1	CDCP2	6944	intergenic	2.151	NA	5	15	1	0	1
1:54593036:A:T	rs609198	1	54593036	T	A	0.4888	0.00473127	-0.461356	0.162607	0.245255	rs954878	1	CDCP2	5710	intergenic	2.327	7	5	15	1	1	1
1:54593150:C:G	rs641328	1	54593150	G	C	0.4888	0.00473127	-0.461356	0.162607	0.245255	rs954878	1	CDCP2	5596	intergenic	8.013	5	5	15	1	1	1
4:115895413:A:T	rs279522	4	115895413	A	T	0.2169	0.00476013	-0.720801	0.254227	0.378122	rs59230330	8	NDST4	0	intronic	0.238	6	15	15	1	0	1
1:54592897:A:C	rs608395	1	54592897	A	C	0.4886	0.00476259	-0.460777	0.162526	0.245556	rs954878	1	CDCP2	5849	intergenic	0.991	7	5	15	1	0	1
4:14186990:A:G	rs77314634	4	14186990	A	G	0.08207	0.00478933	1.31402	0.463778	0.360464	rs1968315	6	RP11-669M16.1	0	ncRNA_intronic	0.03	6	5	15	1	0	1
4:67175089:C:T	rs6847827	4	67175089	C	T	0.3942	0.00481655	-0.53436	0.188724	0.170057	rs67668930	7	MIR1269A	32442	intergenic	3.908	7	9	15	1	0	1
4:115886280:A:T	rs279539	4	115886280	A	T	0.2165	0.00484021	-0.719587	0.254284	0.37929	rs59230330	8	NDST4	0	intronic	0.814	6	9	15	1	0	1
3:14382569:A:G	rs7614275	3	14382569	A	G	0.4471	0.00484479	0.458928	0.162192	0.457316	rs13091718	5	RP11-536I6.1	7381	intergenic	0.065	4	5	15	1	0	1
1:54592563:A:G	rs638605	1	54592563	A	G	0.49	0.00485176	-0.459943	0.162577	0.24878	rs954878	1	CDCP2	6183	intergenic	7.525	7	5	15	1	1	1
4:67169493:C:T	rs12642661	4	67169493	C	T	0.3972	0.00485253	-0.532839	0.188347	0.181759	rs67668930	7	MIR1269A	26846	intergenic	3.623	7	9	15	1	0	1
1:54592423:C:T	rs596189	1	54592423	C	T	0.4902	0.00485365	-0.460238	0.162689	0.249292	rs954878	1	CDCP2	6323	intergenic	2.962	5	5	15	1	0	1
14:50849889:C:T	rs12587997	14	50849889	C	T	0.2099	0.00488611	-0.561044	0.198474	0.202555	rs12896268	19	CDKL1	0	intronic	4.177	6	5	15	1	1	1
14:50849402:C:T	rs35189229	14	50849402	C	T	0.2103	0.00490833	-0.560539	0.1984	0.200586	rs12896268	19	CDKL1	0	intronic	2.927	5	2	15	1	1	1
4:115904000:C:T	rs279514	4	115904000	C	T	0.2159	0.0049448	-0.718451	0.254508	0.379234	rs59230330	8	NDST4	0	intronic	1.593	NA	9	15	1	0	1
4:14174654:A:T	rs28830519	4	14174654	T	A	0.36	0.0049699	0.530774	0.188135	0.177462	rs1968315	6	RP11-669M16.1	0	ncRNA_intronic	1.622	7	1	15	1	1	1
4:67177089:A:G	rs1397752	4	67177089	A	G	0.3908	0.00498432	-0.532403	0.188775	0.150912	rs67668930	7	MIR1269A	34442	intergenic	0.573	NA	14	15	1	0	1
1:54594131:C:T	rs4927056	1	54594131	C	T	0.3526	0.00499094	-0.466714	0.165509	0.541366	rs954878	1	CDCP2	4615	intergenic	0.247	7	5	15	1	1	1
4:115981495:C:T	rs566388	4	115981495	T	C	0.2454	0.0050073	-0.633948	0.2249	0.629241	rs59230330	8	NDST4	0	intronic	0.913	NA	15	15	1	0	1
4:115976690:C:T	rs528983	4	115976690	T	C	0.2442	0.00500757	-0.634064	0.224942	0.635736	rs59230330	8	NDST4	0	intronic	10.07	NA	15	15	1	0	1
4:67175819:C:G	rs1511280	4	67175819	C	G	0.3944	0.00502164	-0.53197	0.188784	0.169951	rs67668930	7	MIR1269A	33172	intergenic	2.884	7	9	15	1	0	1
4:115912013:C:T	rs279505	4	115912013	T	C	0.2151	0.00503525	-0.716051	0.254191	0.383217	rs59230330	8	NDST4	0	intronic	18.87	NA	14	15	1	0	1
4:115880244:A:T	rs10029337	4	115880244	T	A	0.2167	0.00509017	-0.719445	0.255717	0.375589	rs59230330	8	NDST4	0	intronic	0.286	6	9	15	1	0	1
14:50849867:C:G	rs12892108	14	50849867	G	C	0.2107	0.00515773	-0.557754	0.19855	0.20146	rs12896268	19	CDKL1	0	intronic	0.252	7	5	15	1	1	1
4:115886544:C:G	rs279538	4	115886544	C	G	0.2167	0.00516993	-0.713525	0.254072	0.378706	rs59230330	8	NDST4	0	intronic	1.83	5	9	15	1	0	1
8:69937947:A:G	rs2981069	8	69937947	G	A	0.1635	0.00517257	-0.628839	0.22393	0.379217	rs2912504	13	RP11-600K15.1	0	ncRNA_intronic	1.882	NA	5	15	1	0	1
4:115995056:A:T	rs2620399	4	115995056	T	A	0.2502	0.00520049	-0.627621	0.223636	0.61467	rs59230330	8	NDST4	0	intronic	4.192	6	14	15	1	0	1
4:115995320:C:T	rs2620401	4	115995320	C	T	0.2502	0.00520595	-0.627592	0.223653	0.61467	rs59230330	8	NDST4	0	intronic	2.056	6	14	15	1	0	1
4:115893554:A:T	rs279525	4	115893554	A	T	0.2167	0.00520765	-0.713169	0.25416	0.378706	rs59230330	8	NDST4	0	intronic	2.654	6	15	15	1	0	1
4:115886933:A:C	rs279537	4	115886933	A	C	0.2167	0.00522933	-0.711672	0.253749	0.378706	rs59230330	8	NDST4	0	intronic	2.016	NA	9	15	1	0	1
1:54592965:C:T	rs640458	1	54592965	T	C	0.4834	0.00525182	-0.453624	0.161823	0.258946	rs954878	1	CDCP2	5781	intergenic	2.915	7	5	15	1	0	1
4:115974708:A:G	rs499218	4	115974708	A	G	0.2446	0.00525326	-0.630516	0.224933	0.634773	rs59230330	8	NDST4	0	intronic	4.593	5	9	15	1	0	1
4:115983158:C:T	rs530485	4	115983158	C	T	0.2544	0.00529812	-0.629352	0.224741	0.587743	rs59230330	8	NDST4	0	intronic	0.049	NA	15	15	1	0	1
4:115909824:A:G	rs1837801	4	115909824	A	G	0.2165	0.00536935	-0.711707	0.254548	0.376171	rs59230330	8	NDST4	0	intronic	7.15	NA	14	15	1	0	1
4:115870523:A:G	rs10003023	4	115870523	G	A	0.2159	0.00537676	-0.711972	0.254684	0.373728	rs59230330	8	NDST4	0	intronic	0.312	7	14	15	1	0	1
1:54596219:C:T	rs654403	1	54596219	C	T	0.4952	0.00539829	-0.453919	0.16245	0.234509	rs954878	1	CDCP2	2527	intergenic	2.92	7	5	15	1	1	1
4:115877909:G:GAA	rs35469679	4	115877909	GAA	G	0.2149	0.00541612	-0.712124	0.254957	0.377657	rs59230330	8	NDST4	0	intronic	0.735	NA	2	15	1	0	1
4:115876697:G:T	rs12643704	4	115876697	G	T	0.2149	0.00542459	-0.711947	0.25494	0.374549	rs59230330	8	NDST4	0	intronic	2.919	7	7	15	1	0	1
4:115996664:C:T	rs511901	4	115996664	C	T	0.259	0.00546967	-0.623472	0.223476	0.580017	rs59230330	8	NDST4	0	intronic	0.117	NA	14	15	1	0	1
4:115995504:A:T	rs564876	4	115995504	A	T	0.2588	0.00547242	-0.623233	0.223404	0.580191	rs59230330	8	NDST4	0	intronic	2.182	7	14	15	1	0	1
4:115996834:G:T	rs510247	4	115996834	G	T	0.259	0.00547829	-0.62334	0.22347	0.580017	rs59230330	8	NDST4	0	intronic	0.485	NA	14	15	1	0	1
4:115997164:A:G	rs570741	4	115997164	G	A	0.2586	0.00547854	-0.623327	0.223467	0.57926	rs59230330	8	NDST4	0	intronic	3.633	NA	14	15	1	0	1
4:115995713:C:T	rs541329	4	115995713	C	T	0.2588	0.0054937	-0.622694	0.223313	0.580191	rs59230330	8	NDST4	0	intronic	1.949	NA	14	15	1	0	1
4:115869787:A:C	rs12648274	4	115869787	A	C	0.2149	0.00549998	-0.71071	0.254912	0.377151	rs59230330	8	NDST4	0	intronic	5.179	5	14	15	1	0	1
4:115994873:C:G	rs554915	4	115994873	G	C	0.2588	0.00550921	-0.623218	0.223575	0.580191	rs59230330	8	NDST4	0	intronic	0.007	6	14	15	1	0	1
8:69930266:C:T	rs2981071	8	69930266	C	T	0.1649	0.00551983	-0.622408	0.223335	0.386221	rs2912504	13	RP11-600K15.1	0	ncRNA_intronic	0.544	NA	5	15	1	0	1
4:67142335:A:G	rs35732546	4	67142335	A	G	0.3842	0.00555719	-0.522244	0.187543	0.140601	rs67668930	7	MIR1269A	206	upstream	1.247	7	9	15	1	0	1
4:115935744:A:G	rs2583524	4	115935744	G	A	0.2165	0.00556387	-0.709094	0.254679	0.387326	rs59230330	8	NDST4	0	intronic	6.959	5	15	15	1	0	1
4:115935495:C:T	rs279529	4	115935495	T	C	0.2165	0.00557001	-0.709045	0.254695	0.388656	rs59230330	8	NDST4	0	intronic	1.969	7	15	15	1	0	1
4:115924234:A:G	rs2620416	4	115924234	G	A	0.2165	0.00558807	-0.707285	0.25416	0.387827	rs59230330	8	NDST4	0	intronic	0.046	7	9	15	1	0	1
4:115923950:A:C	rs2620414	4	115923950	C	A	0.2165	0.00560148	-0.70708	0.254159	0.387827	rs59230330	8	NDST4	0	intronic	2.34	7	9	15	1	0	1
4:115933903:T:TA	rs11435788	4	115933903	TA	T	0.2165	0.00569982	-0.707181	0.25472	0.387326	rs59230330	8	NDST4	0	intronic	0.625	NA	15	15	1	0	1
4:115909764:A:G	rs1837803	4	115909764	G	A	0.219	0.00574794	-0.702688	0.253355	0.36454	rs59230330	8	NDST4	0	intronic	0.234	NA	14	15	1	0	1
4:115938801:C:T	rs6419194	4	115938801	T	C	0.2063	0.0057636	-0.705692	0.254521	0.416365	rs59230330	8	NDST4	0	intronic	0.793	7	15	15	1	0	1
4:115943848:A:G	rs7679175	4	115943848	A	G	0.2053	0.00576501	-0.705673	0.254521	0.414933	rs59230330	8	NDST4	0	intronic	1.498	7	9	15	1	0	1
4:115938601:C:T	rs279531	4	115938601	C	T	0.2063	0.00576814	-0.705661	0.254534	0.416365	rs59230330	8	NDST4	0	intronic	4.236	6	15	15	1	0	1
1:54596842:C:T	rs57680669	1	54596842	C	T	0.3486	0.00577849	-0.460275	0.166058	0.570684	rs954878	1	CDCP2	1904	intergenic	3.99	5	5	15	1	0	1
4:116008633:A:C	rs496992	4	116008633	A	C	0.2442	0.00579366	-0.625219	0.225637	0.635736	rs59230330	8	NDST4	0	intronic	3.57	6	15	15	1	0	1
4:116005162:A:T	rs563857	4	116005162	T	A	0.2456	0.00579712	-0.625176	0.225637	0.632264	rs59230330	8	NDST4	0	intronic	2.401	7	9	15	1	0	1
8:69941460:C:T	rs7010538	8	69941460	C	T	0.1969	0.00582193	-0.609003	0.219912	0.318738	rs2912504	13	RP11-600K15.1	0	ncRNA_intronic	5.566	7	5	15	1	0	1
8:69908211:C:G	rs1343725	8	69908211	G	C	0.1633	0.00593558	-0.617623	0.223542	0.372487	rs2912504	13	RP11-600K15.1	0	ncRNA_intronic	0.622	5	5	15	1	0	1
8:69905446:G:T	rs5015160	8	69905446	G	T	0.1617	0.00597751	-0.617077	0.223533	0.381056	rs2912504	13	RP11-600K15.1	0	ncRNA_intronic	2.428	5	1	15	1	0	1
8:69912978:A:T	rs10096502	8	69912978	A	T	0.1625	0.00598979	-0.6169	0.223524	0.37519	rs2912504	13	RP11-600K15.1	0	ncRNA_intronic	2.746	6	5	15	1	0	1
6:110741611:A:G	rs2207356	6	110741611	A	G	0.09125	0.00599989	-0.691499	0.250604	0.157405	rs221720	9	SLC22A16	4278	intergenic	5.026	NA	2	15	1	1	1
8:69911977:C:T	rs6472435	8	69911977	C	T	0.1609	0.00602505	-0.616644	0.223589	0.382401	rs2912504	13	RP11-600K15.1	0	ncRNA_intronic	0.273	7	5	15	1	0	1
1:54588229:C:T	rs7530710	1	54588229	T	C	0.4016	0.00627074	-0.452828	0.164986	0.123632	rs954878	1	TCEANC2	10036	intergenic	2.005	5	5	15	1	0	1
4:116063547:A:C	rs76969630	4	116063547	C	A	0.03055	0.0063041	-0.941824	0.34337	0.102821	rs59230330	8	MRPS33P3	590	upstream	0.098	6	5	15	1	0	1
14:50762701:C:T	rs7151147	14	50762701	C	T	0.275	0.00631504	-0.483986	0.176489	0.114019	rs12896268	19	L2HGDH	0	intronic	1.957	7	5	5	1	1	1
17:10078516:C:T	rs8066598	17	10078516	T	C	0.4111	0.00633691	0.449984	0.164159	0.105709	rs8081398	20	GAS7	0	intronic	2.021	3a	5	15	1	0	1
4:14162273:C:T	rs57398332	4	14162273	C	T	0.1514	0.00636486	0.664502	0.242547	0.309952	rs1968315	6	RP11-669M16.1	3805	intergenic	0.074	7	5	15	1	0	1
4:115884515:A:T	rs28677056	4	115884515	A	T	0.2017	0.00647477	-0.708104	0.259002	0.426439	rs59230330	8	NDST4	0	intronic	4.411	7	15	15	1	0	1
7:108216592:A:AAG	rs112690319	7	108216592	A	AAG	0.06709	0.00672704	-1.21916	0.448029	0.110824	rs141901173	11	DNAJB9	1297	intergenic	4.667	NA	4	5	1	0	1
7:108222611:C:G	rs73713163	7	108222611	G	C	0.06629	0.00673181	-1.21945	0.448174	0.112967	rs141901173	11	DNAJB9	7316	intergenic	5.632	4	2	15	1	0	1
1:54591265:A:G	rs612297	1	54591265	G	A	0.3688	0.00674624	-0.447041	0.164341	0.504766	rs954878	1	CDCP2	7481	intergenic	1.426	5	5	15	1	1	1
1:54592594:A:G	rs638643	1	54592594	G	A	0.3704	0.00674942	-0.447016	0.164341	0.501339	rs954878	1	CDCP2	6152	intergenic	0.424	6	5	15	1	1	1
1:54588534:C:T	rs9436934	1	54588534	T	C	0.3626	0.00676143	-0.447094	0.164406	0.52426	rs954878	1	CDCP2	10212	intergenic	7.72	5	5	15	1	0	1
1:54588882:A:G	rs7528864	1	54588882	G	A	0.3638	0.00681754	-0.446581	0.164384	0.517525	rs954878	1	CDCP2	9864	intergenic	1.704	3a	5	15	1	0	1
4:14206331:C:T	rs78231845	4	14206331	T	C	0.07628	0.00687433	1.29886	0.478597	0.348182	rs1968315	6	RP11-669M16.1	0	ncRNA_intronic	1.55	6	5	15	1	0	1
7:108218919:T:TA	rs138738162	7	108218919	T	TA	0.06769	0.0069072	-1.21868	0.449319	0.101282	rs141901173	11	DNAJB9	3624	intergenic	0.262	NA	4	5	1	0	1
8:69940284:A:G	rs4349991	8	69940284	A	G	0.1653	0.00692979	-0.609316	0.224741	0.393777	rs2912504	13	RP11-600K15.1	0	ncRNA_intronic	1.313	6	5	15	1	0	1
14:50742249:C:T	rs4901009	14	50742249	C	T	0.2746	0.00693649	-0.47917	0.176759	0.113901	rs12896268	19	L2HGDH	0	intronic	8.602	7	4	5	1	1	1
4:14186241:C:T	rs4401446	4	14186241	C	T	0.07728	0.00694912	1.29485	0.477759	0.352002	rs1968315	6	RP11-669M16.1	0	ncRNA_intronic	1.348	4	5	15	1	0	1
4:14202665:A:T	rs10516276	4	14202665	A	T	0.07668	0.00695022	1.29483	0.477761	0.348456	rs1968315	6	RP11-669M16.1	0	ncRNA_intronic	0.352	7	9	15	1	0	1
8:69923119:C:T	rs12680675	8	69923119	T	C	0.1649	0.00695379	-0.600978	0.221761	0.386221	rs2912504	13	RP11-600K15.1	0	ncRNA_intronic	2.755	6	5	15	1	0	1
4:14187501:A:G	rs1426132	4	14187501	A	G	0.07728	0.00695697	1.29471	0.477774	0.352002	rs1968315	6	RP11-669M16.1	0	ncRNA_intronic	1.091	NA	5	15	1	0	1
17:10072595:A:T	rs28376901	17	10072595	T	A	0.3243	0.00703275	-0.487389	0.180099	0.299489	rs8081398	20	GAS7	0	intronic	1.203	7	5	15	1	0	1
4:14234320:A:G	rs12513351	4	14234320	A	G	0.1146	0.00703372	0.757871	0.280052	0.6251	rs1968315	6	RP11-669M16.1	0	ncRNA_intronic	10.33	6	5	15	1	1	1
4:14196490:A:C	rs78066135	4	14196490	C	A	0.08267	0.00711162	1.27229	0.470787	0.361271	rs1968315	6	RP11-669M16.1	0	ncRNA_intronic	2.211	7	9	15	1	0	1
4:116001490:A:T	rs493796	4	116001490	A	T	0.3157	0.00712197	-0.599476	0.221865	0.367409	rs59230330	8	NDST4	0	intronic	1.428	7	15	15	1	0	1
14:50877854:C:T	rs11844740	14	50877854	C	T	0.4573	0.00714049	0.460582	0.170516	0.178397	rs12896268	19	CDKL1	0	intergenic	8.868	2b	5	15	1	1	1
1:173249105:A:G	rs61828267	1	173249105	G	A	0.07268	0.00715526	-0.782315	0.289703	0.439139	rs72724954	3	snoU13	1110	intergenic	1.169	6	7	15	1	0	1
1:173255809:A:C	rs12124768	1	173255809	C	A	0.06649	0.00720417	-0.781747	0.289739	0.460998	rs72724954	3	snoU13	5499	intergenic	0.803	7	14	15	1	0	1
4:67163272:C:T	rs67228455	4	67163272	T	C	0.364	0.00735085	-0.506065	0.188038	0.171305	rs67668930	7	MIR1269A	20625	intergenic	4.21	7	14	15	1	0	1
19:13699891:A:C	rs765127	19	13699891	C	A	0.257	0.0073974	-0.58166	0.216298	0.245539	rs7252743	21	CACNA1A	0	intronic	8.558	4	1	15	1	0	1
4:115986497:A:G	rs525465	4	115986497	G	A	0.2865	0.00741983	-0.600349	0.223333	0.469924	rs59230330	8	NDST4	0	intronic	0.887	NA	9	15	1	0	1
4:115986995:A:T	rs502179	4	115986995	A	T	0.2865	0.00742115	-0.600331	0.223332	0.469924	rs59230330	8	NDST4	0	intronic	3.046	5	9	15	1	0	1
6:110785883:C:T	rs78870594	6	110785883	C	T	0.05132	0.00748209	-1.68413	0.627169	0.710417	rs221720	9	SLC22A16	0	intronic	1.871	7	9	15	1	0	1
1:173240995:C:T	rs12125395	1	173240995	C	T	0.07149	0.00760689	-0.772344	0.288222	0.421011	rs72724954	3	snoU13	9220	intergenic	1.31	7	5	15	1	0	1
1:173235164:A:G	rs12141186	1	173235164	G	A	0.07268	0.00763009	-0.771972	0.288194	0.439139	rs72724954	3	snoU13	15051	intergenic	2.433	5	5	15	1	0	1
1:173235155:C:T	rs12138547	1	173235155	T	C	0.07268	0.00764383	-0.771829	0.288207	0.444274	rs72724954	3	snoU13	15060	intergenic	2.387	5	5	15	1	0	1
19:13697720:C:T	rs10417089	19	13697720	T	C	0.47	0.00771948	-0.499168	0.186626	0.395934	rs7252743	21	CACNA1A	0	intronic	2.687	5	5	15	1	0	1
1:173241960:C:T	rs12120808	1	173241960	C	T	0.07149	0.00777479	-0.767688	0.28728	0.427264	rs72724954	3	snoU13	8255	intergenic	2.869	7	5	15	1	0	1
4:115867911:C:T	rs7670771	4	115867911	T	C	0.2167	0.00779061	-0.672172	0.251602	0.370902	rs59230330	8	NDST4	0	intronic	3.452	5	9	15	1	0	1
1:54591269:C:T	rs688404	1	54591269	T	C	0.369	0.0079118	-0.438745	0.164551	0.505453	rs954878	1	CDCP2	7477	intergenic	0.164	5	5	15	1	1	1
6:110745846:A:G	rs79687203	6	110745846	G	A	0.07248	0.00793085	-0.81084	0.304199	0.218472	rs221720	9	SLC22A16	43	downstream	2.711	5	5	15	1	1	1
13:55042573:G:T	rs34776120	13	55042573	G	T	0.04273	0.00793533	-0.832279	0.312264	0.163352	rs11619037	18	RPL13AP25	27122	intergenic	1.625	6	9	15	1	0	1
19:13699931:C:T	rs765128	19	13699931	C	T	0.2568	0.00799681	-0.575993	0.216322	0.245653	rs7252743	21	CACNA1A	0	intronic	5.406	4	1	15	1	0	1
8:69927346:C:T	rs12544142	8	69927346	C	T	0.1825	0.00801132	-0.591361	0.222145	0.323728	rs2912504	13	RP11-600K15.1	0	ncRNA_intronic	1.022	7	5	15	1	0	1
1:160376060:C:T	rs12090877	1	160376060	C	T	0.1004	0.00802615	-0.703116	0.264188	0.182291	rs77847479	2	VANGL2	0	intronic	10.71	5	2	5	1	1	1
19:13698651:C:T	rs72620561	19	13698651	T	C	0.2496	0.0080451	-0.575301	0.216229	0.235827	rs7252743	21	CACNA1A	0	intronic	0.602	7	5	15	1	0	1
12:78431384:A:G	rs7131875	12	78431384	A	G	0.09685	0.00807437	-0.727517	0.273567	0.101402	rs5799370	17	NAV3	0	intronic	3.343	7	1	15	1	0	1
4:116000234:A:G	rs525972	4	116000234	A	G	0.3183	0.00813947	-0.584728	0.220102	0.351605	rs59230330	8	NDST4	0	intronic	1.804	NA	14	15	1	0	1
19:13698250:G:T	rs138122062	19	13698250	T	G	0.2484	0.00815369	-0.574636	0.216351	0.22947	rs7252743	21	CACNA1A	0	intronic	3.188	7	5	15	1	0	1
4:116002451:A:C	rs493304	4	116002451	C	A	0.3181	0.00816335	-0.584471	0.220088	0.3559	rs59230330	8	NDST4	0	intronic	0.869	NA	9	15	1	0	1
4:116001894:C:T	rs481751	4	116001894	T	C	0.3189	0.00817147	-0.584409	0.220093	0.356002	rs59230330	8	NDST4	0	intronic	5.215	NA	15	15	1	0	1
4:116002140:C:T	rs479087	4	116002140	T	C	0.3185	0.00817147	-0.584409	0.220093	0.357334	rs59230330	8	NDST4	0	intronic	0.369	NA	15	15	1	0	1
4:115999927:C:T	rs528793	4	115999927	C	T	0.3163	0.00817285	-0.584526	0.220141	0.362188	rs59230330	8	NDST4	0	intronic	0.12	NA	14	15	1	0	1
19:13696034:A:C	rs72620557	19	13696034	A	C	0.2488	0.00817805	-0.574417	0.216352	0.231217	rs7252743	21	CACNA1A	0	intronic	8.289	6	4	15	1	0	1
19:13700140:A:G	rs72620563	19	13700140	A	G	0.2584	0.00819353	-0.573365	0.216009	0.242773	rs7252743	21	CACNA1A	0	intronic	6.834	NA	1	15	1	0	1
19:13700128:A:G	rs72620562	19	13700128	G	A	0.2568	0.00819861	-0.573378	0.216031	0.24527	rs7252743	21	CACNA1A	0	intronic	4.477	2a	1	15	1	0	1
4:67166587:A:C	rs28448605	4	67166587	A	C	0.3662	0.00821038	-0.498332	0.18779	0.188087	rs67668930	7	MIR1269A	23940	intergenic	3.898	6	15	15	1	0	1
4:67167064:A:G	rs10016795	4	67167064	G	A	0.3634	0.00821057	-0.49837	0.187805	0.17246	rs67668930	7	MIR1269A	24417	intergenic	0.907	6	15	15	1	0	1
1:54588398:A:C	rs7516735	1	54588398	C	A	0.4161	0.0082387	-0.426144	0.160659	0.128687	rs954878	1	TCEANC2	10205	intergenic	2.152	5	5	15	1	0	1
1:173229349:T:TCCAAC	rs74617045	1	173229349	T	TCCAAC	0.07268	0.00824266	-0.762886	0.28763	0.439139	rs72724954	3	snoU13	20866	intergenic	3.302	NA	5	15	1	0	1
2:118893499:C:G	rs3843850	2	118893499	C	G	0.3299	0.00824659	-0.469605	0.177066	0.137513	rs2422177	4	AC093901.1	0	ncRNA_intronic	0.063	6	7	15	1	1	1
1:54594347:C:T	rs673403	1	54594347	C	T	0.491	0.00828162	-0.434076	0.163759	0.202664	rs954878	1	CDCP2	4399	intergenic	11.12	5	5	15	1	1	1
19:13698384:C:T	rs144737040	19	13698384	C	T	0.2472	0.00831129	-0.572904	0.216233	0.231387	rs7252743	21	CACNA1A	0	intronic	0.016	7	5	15	1	0	1
4:14177726:A:AT	rs74342284	4	14177726	AT	A	0.07588	0.0083175	1.26139	0.476137	0.326592	rs1968315	6	RP11-669M16.1	0	ncRNA_intronic	2.729	NA	5	15	1	0	1
4:14179109:A:G	rs76395727	4	14179109	A	G	0.07588	0.00834855	1.26491	0.477694	0.326592	rs1968315	6	RP11-669M16.1	0	ncRNA_intronic	2.105	5	2	15	1	0	1
4:67127879:C:T	rs35701453	4	67127879	C	T	0.3766	0.00836716	-0.500458	0.189053	0.173754	rs67668930	7	MIR1269A	14662	intergenic	0.961	6	9	15	1	0	1
1:54591322:A:G	rs612368	1	54591322	A	G	0.49	0.0083819	-0.431239	0.162942	0.207974	rs954878	1	CDCP2	7424	intergenic	3.465	3a	5	15	1	0	1
1:173220486:A:C	rs17300677	1	173220486	C	A	0.07169	0.00839717	-0.760289	0.28734	0.425852	rs72724954	3	snoU13	29729	intergenic	0.322	7	5	15	1	0	1
1:173220536:C:G	rs72722865	1	173220536	G	C	0.07268	0.00839717	-0.760289	0.28734	0.439139	rs72724954	3	snoU13	29679	intergenic	1.284	7	5	15	1	0	1
1:173219641:C:G	rs12144033	1	173219641	C	G	0.07288	0.00854605	-0.75839	0.287278	0.437722	rs72724954	3	snoU13	30574	intergenic	3.025	7	5	15	1	0	1
8:69936217:A:C	rs145218853	8	69936217	A	C	0.1839	0.00859793	-0.588622	0.223146	0.321973	rs2912504	13	RP11-600K15.1	0	ncRNA_intronic	1.377	7	5	15	1	0	1
8:69939432:C:CA	rs34812817	8	69939432	C	CA	0.1807	0.00870616	-0.587744	0.223177	0.334286	rs2912504	13	RP11-600K15.1	0	ncRNA_intronic	0.698	NA	5	15	1	0	1
19:13696922:G:T	rs7257348	19	13696922	T	G	0.4657	0.00872299	-0.489925	0.18608	0.399696	rs7252743	21	CACNA1A	0	intronic	1.36	6	5	15	1	0	1
8:69938895:C:T	rs2912525	8	69938895	T	C	0.1991	0.00879762	-0.582318	0.221419	0.272948	rs2912504	13	RP11-600K15.1	0	ncRNA_intronic	6.263	5	5	15	1	0	1
4:116002474:A:G	rs493237	4	116002474	G	A	0.3281	0.00881846	-0.576087	0.219118	0.328353	rs59230330	8	NDST4	0	intronic	3.914	NA	9	15	1	0	1
8:69926044:C:T	rs10957456	8	69926044	T	C	0.1821	0.00885175	-0.583874	0.22219	0.325303	rs2912504	13	RP11-600K15.1	0	ncRNA_intronic	5.805	6	5	15	1	0	1
4:115989299:A:T	rs4264850	4	115989299	T	A	0.3546	0.0089338	-0.572272	0.218038	0.313201	rs59230330	8	NDST4	0	intronic	2.592	6	9	15	1	0	1
14:50847861:A:G	rs6572667	14	50847861	G	A	0.2192	0.00896807	-0.507383	0.193413	0.20859	rs12896268	19	CDKL1	0	intronic	5.4	6	4	15	1	1	1
6:110770508:A:T	rs9487410	6	110770508	A	T	0.3155	0.00905743	-0.50437	0.192516	0.131913	rs221720	9	SLC22A16	0	intronic	1.264	5	1	15	1	1	1
4:115867448:G:GA	rs112715556	4	115867448	G	GA	0.2149	0.00909431	-0.666264	0.254446	0.3731	rs59230330	8	NDST4	0	intronic	0.863	NA	9	15	1	0	1
2:118944055:A:T	rs7592048	2	118944055	A	T	0.4333	0.00909437	-0.462218	0.176521	0.345221	rs2422177	4	AC093901.1	92	upstream	6.34	1f	1	1	1	1	1
1:54589719:C:G	rs671083	1	54589719	C	G	0.4756	0.00917364	-0.429305	0.16414	0.19419	rs954878	1	CDCP2	9027	intergenic	0.028	5	5	15	1	1	1
2:119007927:C:T	rs12711901	2	119007927	T	C	0.2652	0.00928051	-0.666913	0.255379	0.286883	rs2422177	4	AC093901.1	63964	intergenic	2.285	5	5	14	0	0	1
19:13697244:A:G	rs72620560	19	13697244	G	A	0.2516	0.00928104	-0.563484	0.215775	0.236332	rs7252743	21	CACNA1A	0	intronic	3.175	6	5	15	1	0	1
4:14227801:A:C	rs74946853	4	14227801	A	C	0.1106	0.00930953	0.738225	0.282803	0.573397	rs1968315	6	RP11-669M16.1	0	ncRNA_intronic	2.143	6	5	15	1	1	1
4:115975691:A:G	rs528678	4	115975691	G	A	0.2931	0.00931534	-0.582443	0.223144	0.449157	rs59230330	8	NDST4	0	intronic	1.132	NA	15	15	1	0	1
4:14243288:C:G	rs11929730	4	14243288	C	G	0.1124	0.00931552	0.738482	0.282926	0.607087	rs1968315	6	RP11-669M16.1	0	ncRNA_intronic	2.326	4	5	15	1	0	1
19:13696046:C:T	rs72620558	19	13696046	C	T	0.2536	0.00931748	-0.563192	0.215775	0.23474	rs7252743	21	CACNA1A	0	intronic	2.133	6	4	15	1	0	1
4:115976453:A:G	rs531594	4	115976453	A	G	0.2931	0.00931933	-0.582407	0.223143	0.449157	rs59230330	8	NDST4	0	intronic	4.515	NA	15	15	1	0	1
19:13696432:G:T	rs72620559	19	13696432	G	T	0.2538	0.00933875	-0.563026	0.215777	0.233828	rs7252743	21	CACNA1A	0	intronic	0.196	6	4	15	1	0	1
8:69910955:A:C	rs6985889	8	69910955	C	A	0.1821	0.00942122	-0.580238	0.222633	0.320342	rs2912504	13	RP11-600K15.1	0	ncRNA_intronic	1.98	7	5	15	1	0	1
14:51093142:A:G	rs2356455	14	51093142	A	G	0.4688	0.00947983	0.434905	0.167008	0.201022	rs12896268	19	ATL1	0	intronic	3.138	3a	4	5	1	1	1
3:14390507:C:T	rs12639065	3	14390507	T	C	0.4812	0.00950552	0.413289	0.158765	0.105066	rs13091718	5	RP11-536I6.1	0	ncRNA_intronic	3.23	5	5	15	1	0	1
7:9538306:C:T	rs17802344	7	9538306	T	C	0.02855	0.00950854	-0.771709	0.296464	0.346323	rs77755643	10	AC079756.1	95940	intergenic	0.841	5	15	15	0	0	1
14:51093216:A:T	rs2356456	14	51093216	A	T	0.4688	0.00956446	0.43444	0.167028	0.201022	rs12896268	19	ATL1	0	intronic	3.646	4	4	5	1	1	1
19:13693816:G:T	rs34415439	19	13693816	G	T	0.3263	0.00956643	-0.444737	0.170991	0.474783	rs7252743	21	CACNA1A	0	intronic	3.341	5	5	15	1	0	1
4:67601385:A:G	rs28522532	4	67601385	A	G	0.2031	0.00986474	-0.726263	0.280385	0.117505	rs67668930	7	RNU6-699P	161594	intergenic	0.812	6	5	15	0	0	1
2:119008174:C:T	rs12996758	2	119008174	C	T	0.265	0.00987827	-0.662037	0.255636	0.287251	rs2422177	4	AC093901.1	64211	intergenic	0.155	4	5	14	0	0	1
13:54800461:C:T	rs12877963	13	54800461	T	C	0.1026	0.00994569	-0.770442	0.297768	0.200763	rs11619037	18	LINC00458	93459	intergenic	3.145	6	7	15	0	0	1
19:13699507:C:T	rs2032818	19	13699507	T	C	0.3301	0.00995184	-0.431529	0.166796	0.558002	rs7252743	21	CACNA1A	0	intronic	1.929	NA	5	15	1	0	1
7:9537201:A:G	rs9918582	7	9537201	G	A	0.02855	0.00999192	-0.767047	0.296642	0.346323	rs77755643	10	AC079756.1	97045	intergenic	2.579	6	15	15	0	0	1
1:54590342:A:G	rs598016	1	54590342	A	G	0.4754	0.0100914	-0.425058	0.164604	0.196188	rs954878	1	CDCP2	8404	intergenic	1.591	4	5	15	1	0	1
4:14159043:C:T	rs75677384	4	14159043	C	T	0.1	0.0101943	1.13477	0.440045	0.151045	rs1968315	6	RP11-669M16.1	7035	intergenic	1.253	4	5	15	1	0	1
4:115889238:C:T	rs2165543	4	115889238	C	T	0.2236	0.0102177	-0.645556	0.250414	0.354505	rs59230330	8	NDST4	0	intronic	4.621	6	9	15	1	0	1
4:116006635:C:T	rs529078	4	116006635	T	C	0.3141	0.0102309	-0.567633	0.220226	0.371183	rs59230330	8	NDST4	0	intronic	5.705	NA	9	15	1	0	1
4:116005828:C:T	rs536446	4	116005828	C	T	0.3111	0.0102327	-0.566771	0.219897	0.382738	rs59230330	8	NDST4	0	intronic	0.041	NA	8	15	1	0	1
4:116005955:A:G	rs508357	4	116005955	A	G	0.3141	0.0102339	-0.567611	0.220226	0.371183	rs59230330	8	NDST4	0	intronic	0.361	NA	8	15	1	0	1
12:78431250:C:T	rs3847778	12	78431250	T	C	0.09505	0.0104175	-0.70195	0.273009	0.123961	rs5799370	17	NAV3	0	intronic	7.803	NA	1	15	1	0	1
19:13692406:C:T	rs72620556	19	13692406	T	C	0.2498	0.0104205	-0.554151	0.215534	0.226656	rs7252743	21	CACNA1A	0	intronic	1.183	5	1	15	1	0	1
4:116003229:C:T	rs1824954	4	116003229	C	T	0.3157	0.0105039	-0.566152	0.220442	0.367409	rs59230330	8	NDST4	0	intronic	1.671	NA	9	15	1	0	1
4:116004482:G:T	rs505154	4	116004482	G	T	0.3189	0.0105276	-0.566724	0.220732	0.356002	rs59230330	8	NDST4	0	intronic	3.27	NA	9	15	1	0	1
1:54591442:C:T	rs689239	1	54591442	C	T	0.4511	0.0106303	-0.41428	0.161572	0.180454	rs954878	1	CDCP2	7304	intergenic	0.32	2b	5	15	1	0	1
4:115987887:A:T	rs531435	4	115987887	A	T	0.3241	0.0106671	-0.561018	0.218904	0.3436	rs59230330	8	NDST4	0	intronic	6.908	7	9	15	1	0	1
4:115987337:A:G	rs573588	4	115987337	A	G	0.3239	0.0106864	-0.560849	0.218893	0.343961	rs59230330	8	NDST4	0	intronic	4.538	NA	9	15	1	0	1
4:115987357:A:T	rs505696	4	115987357	A	T	0.3239	0.0106881	-0.560833	0.218891	0.343961	rs59230330	8	NDST4	0	intronic	0.357	6	9	15	1	0	1
11:117543578:A:G	rs17121072	11	117543578	G	A	0.02995	0.0106883	1.78428	0.696398	0.354774	rs658274	15	DSCAML1	0	intronic	3.872	5	5	14	1	1	0
4:115986130:A:G	rs550019	4	115986130	A	G	0.3239	0.0106896	-0.560885	0.218916	0.343961	rs59230330	8	NDST4	0	intronic	0.045	6	9	15	1	0	1
4:115987004:A:G	rs520853	4	115987004	G	A	0.3239	0.0106927	-0.560853	0.218912	0.343961	rs59230330	8	NDST4	0	intronic	3.793	NA	9	15	1	0	1
2:119090725:G:T	rs6731528	2	119090725	T	G	0.09884	0.0107973	-0.826815	0.323155	0.123832	rs2422177	4	AC093901.1	146762	intergenic	0.182	7	5	15	0	0	1
4:115988885:C:CTT	rs143037463	4	115988885	CTT	C	0.3235	0.0109935	-0.557689	0.218511	0.34362	rs59230330	8	NDST4	0	intronic	4.149	NA	9	15	1	0	1
2:119007936:C:T	rs12711902	2	119007936	T	C	0.2949	0.0111117	-0.580966	0.227969	0.28066	rs2422177	4	AC093901.1	63973	intergenic	0.294	5	5	14	0	0	1
4:115989614:C:T	rs479321	4	115989614	T	C	0.3255	0.0111687	-0.556434	0.218497	0.337759	rs59230330	8	NDST4	0	intronic	0.591	6	9	15	1	0	1
4:67194292:C:T	rs1397751	4	67194292	T	C	0.4127	0.0111702	-0.478891	0.188052	0.149186	rs67668930	7	MIR1269A	51645	intergenic	0.448	NA	9	15	0	0	1
4:115990872:C:T	rs547928	4	115990872	T	C	0.3255	0.0111792	-0.556534	0.218565	0.337759	rs59230330	8	NDST4	0	intronic	1.998	NA	9	15	1	0	1
4:115988765:A:G	rs538932	4	115988765	A	G	0.3241	0.0111839	-0.556499	0.218564	0.343039	rs59230330	8	NDST4	0	intronic	1.568	NA	9	15	1	0	1
4:115991295:C:T	rs4834449	4	115991295	C	T	0.3255	0.0111856	-0.556484	0.218563	0.337759	rs59230330	8	NDST4	0	intronic	10.15	7	9	15	1	0	1
4:115990121:A:T	rs575703	4	115990121	A	T	0.3249	0.0111918	-0.556436	0.218561	0.336682	rs59230330	8	NDST4	0	intronic	2.229	6	9	15	1	0	1
4:115992044:C:T	rs515976	4	115992044	T	C	0.3261	0.0111918	-0.556439	0.218562	0.338305	rs59230330	8	NDST4	0	intronic	3.02	NA	9	15	1	0	1
4:115990342:C:T	rs482683	4	115990342	C	T	0.3255	0.0111921	-0.556431	0.218559	0.337759	rs59230330	8	NDST4	0	intronic	1.075	NA	9	15	1	0	1
4:115990467:C:T	rs481667	4	115990467	C	T	0.3255	0.0111921	-0.556431	0.218559	0.337759	rs59230330	8	NDST4	0	intronic	2.718	NA	9	15	1	0	1
4:115991181:C:G	rs28668946	4	115991181	C	G	0.3255	0.0111921	-0.556431	0.218559	0.337759	rs59230330	8	NDST4	0	intronic	1.131	7	9	15	1	0	1
4:115991462:A:T	rs3132822	4	115991462	A	T	0.3255	0.0111921	-0.556431	0.218559	0.337759	rs59230330	8	NDST4	0	intronic	3.066	7	9	15	1	0	1
4:115991921:A:T	rs531263	4	115991921	T	A	0.3255	0.0111921	-0.556431	0.218559	0.337759	rs59230330	8	NDST4	0	intronic	0.723	7	9	15	1	0	1
4:115990208:A:G	rs483675	4	115990208	G	A	0.3255	0.0111925	-0.556433	0.218561	0.337759	rs59230330	8	NDST4	0	intronic	1.437	NA	9	15	1	0	1
4:115988666:A:C	rs559670	4	115988666	A	C	0.3239	0.0111979	-0.556397	0.218562	0.343961	rs59230330	8	NDST4	0	intronic	3.002	6	9	15	1	0	1
4:115989834:A:G	rs1842264	4	115989834	G	A	0.3255	0.0111981	-0.556431	0.218576	0.337759	rs59230330	8	NDST4	0	intronic	1.477	NA	9	15	1	0	1
4:115988048:A:G	rs533155	4	115988048	G	A	0.3241	0.0112005	-0.556528	0.218621	0.3436	rs59230330	8	NDST4	0	intronic	0.602	7	9	15	1	0	1
4:115990373:C:T	rs481922	4	115990373	T	C	0.3255	0.0112094	-0.556342	0.218571	0.337759	rs59230330	8	NDST4	0	intronic	2.259	NA	9	15	1	0	1
4:67124384:C:G	rs440832	4	67124384	C	G	0.3738	0.0112125	-0.56329	0.22131	0.168049	rs67668930	7	MIR1269A	18157	intergenic	0.942	6	9	15	1	0	1
4:115988156:A:G	rs566096	4	115988156	A	G	0.3241	0.0112165	-0.556407	0.218616	0.3436	rs59230330	8	NDST4	0	intronic	0.682	NA	9	15	1	0	1
4:115989498:C:T	rs511357	4	115989498	C	T	0.3255	0.0112292	-0.556207	0.218572	0.337759	rs59230330	8	NDST4	0	intronic	1.414	NA	9	15	1	0	1
4:115992068:C:G	rs530167	4	115992068	G	C	0.3261	0.0112294	-0.556218	0.218577	0.338305	rs59230330	8	NDST4	0	intronic	0.131	7	9	15	1	0	1
19:13697096:C:T	rs12463063	19	13697096	T	C	0.3253	0.0112601	-0.424083	0.166715	0.565868	rs7252743	21	CACNA1A	0	intronic	0.152	7	5	15	1	0	1
4:115975066:A:G	rs2620431	4	115975066	G	A	0.2931	0.0112735	-0.567821	0.223258	0.449157	rs59230330	8	NDST4	0	intronic	0.322	6	9	15	1	0	1
4:115977460:C:G	rs522307	4	115977460	G	C	0.2931	0.0112881	-0.567684	0.223244	0.449157	rs59230330	8	NDST4	0	intronic	6.146	7	15	15	1	0	1
19:13683961:A:G	rs57105748	19	13683961	G	A	0.3037	0.0113612	-0.581763	0.228987	0.13102	rs7252743	21	CACNA1A	0	intronic	5.555	5	5	15	1	0	1
4:67121164:A:T	rs79984446	4	67121164	T	A	0.3816	0.011386	-0.562585	0.221506	0.140603	rs67668930	7	MIR1269A	21377	intergenic	0.538	6	15	15	1	0	1
2:118927720:A:G	rs11123476	2	118927720	G	A	0.3892	0.0114493	-0.452018	0.17811	0.340344	rs2422177	4	AC093901.1	0	ncRNA_intronic	0.275	7	5	15	1	1	1
4:115984744:C:T	rs516109	4	115984744	C	T	0.3337	0.0114606	-0.553337	0.218063	0.314685	rs59230330	8	NDST4	0	intronic	0.435	5	15	15	1	0	1
2:118930058:A:T	rs3914669	2	118930058	A	T	0.3886	0.0114614	-0.452001	0.17813	0.340518	rs2422177	4	AC093901.1	0	ncRNA_intronic	7.389	7	5	15	1	1	1
4:115984811:A:G	rs516919	4	115984811	A	G	0.3337	0.0114673	-0.553286	0.218061	0.314685	rs59230330	8	NDST4	0	intronic	0.918	5	15	15	1	0	1
4:67119211:A:G	rs454283	4	67119211	G	A	0.383	0.0115223	-0.55853	0.220275	0.140169	rs67668930	7	MIR1269A	23330	intergenic	0.639	NA	15	15	1	0	1
2:118947788:G:GC	rs10706233	2	118947788	G	GC	0.4077	0.0115706	-0.44889	0.177139	0.350273	rs2422177	4	AC093901.1	3825	intergenic	0.633	NA	5	14	1	1	1
2:118946854:C:T	rs4848497	2	118946854	C	T	0.4054	0.0116126	-0.448068	0.176904	0.351992	rs2422177	4	AC093901.1	2891	intergenic	1.348	7	5	14	1	1	1
14:51046526:C:G	rs7154131	14	51046526	C	G	0.4439	0.011702	0.421125	0.166445	0.207755	rs12896268	19	ATL1	0	intronic	4.417	7	5	15	1	1	1
2:118946643:A:G	rs4849683	2	118946643	A	G	0.4315	0.0117127	-0.446796	0.176614	0.334419	rs2422177	4	AC093901.1	2680	intergenic	4.192	5	2	14	1	1	1
19:13696431:G:T	rs2112465	19	13696431	G	T	0.3255	0.0117361	-0.419765	0.165976	0.56876	rs7252743	21	CACNA1A	0	intronic	2.743	6	4	15	1	0	1
4:115981916:C:G	rs537512	4	115981916	G	C	0.3253	0.0118286	-0.552792	0.218816	0.338115	rs59230330	8	NDST4	0	intronic	0.307	7	15	15	1	0	1
4:115984144:C:T	rs500409	4	115984144	T	C	0.3257	0.0118996	-0.552264	0.218792	0.338469	rs59230330	8	NDST4	0	intronic	0.973	NA	15	15	1	0	1
4:115981549:C:G	rs533950	4	115981549	G	C	0.3253	0.0119153	-0.552172	0.218796	0.338115	rs59230330	8	NDST4	0	intronic	4.006	6	15	15	1	0	1
4:115983253:C:T	rs508583	4	115983253	T	C	0.3253	0.0120602	-0.551281	0.218817	0.338115	rs59230330	8	NDST4	0	intronic	2.112	NA	15	15	1	0	1
4:14174118:C:T	rs201972468	4	14174118	C	T	0.1334	0.0122717	1.0808	0.430055	0.126815	rs1968315	6	RP11-669M16.1	0	ncRNA_intronic	3.101	7	1	15	1	0	1
1:173246262:C:T	rs12144635	1	173246262	T	C	0.07368	0.012273	-0.713897	0.284066	0.433447	rs72724954	3	snoU13	3953	intergenic	11.45	4	5	15	1	0	1
2:118931233:A:G	rs6542429	2	118931233	A	G	0.3974	0.0122921	-0.448252	0.178403	0.327355	rs2422177	4	AC093901.1	0	ncRNA_intronic	10.27	5	5	15	1	1	1
1:173247628:A:G	rs17300754	1	173247628	A	G	0.07368	0.0123065	-0.714277	0.284328	0.433447	rs72724954	3	snoU13	2587	intergenic	6.617	7	5	15	1	0	1
23:81718487:C:T	rs17303742	23	81718487	C	T	0.1887	0.0123151	0.373634	0.148745	0.381716	rs73241354	22	RP4-581F12.1	34630	intergenic	0.242	7	9	15	1	0	0
1:173246509:A:G	rs12144665	1	173246509	A	G	0.07348	0.0123155	-0.714193	0.284324	0.434833	rs72724954	3	snoU13	3706	intergenic	1.058	4	5	15	1	0	1
7:9540216:G:T	rs73052442	7	9540216	T	G	0.05312	0.0123169	-0.714477	0.284442	0.160201	rs77755643	10	AC079756.1	94030	intergenic	0.194	6	9	15	0	0	1
1:54590341:A:C	rs673866	1	54590341	A	C	0.4754	0.0124562	-0.412109	0.164329	0.196188	rs954878	1	CDCP2	8405	intergenic	1.405	4	5	15	1	0	1
4:115984133:G:T	rs489558	4	115984133	T	G	0.3341	0.0127495	-0.544745	0.217941	0.315079	rs59230330	8	NDST4	0	intronic	1.572	NA	15	15	1	0	1
4:115982672:A:C	rs7434687	4	115982672	A	C	0.3337	0.0127626	-0.544664	0.217942	0.314685	rs59230330	8	NDST4	0	intronic	5.779	6	15	15	1	0	1
4:115983119:A:C	rs530616	4	115983119	A	C	0.3337	0.0127648	-0.544658	0.217944	0.314685	rs59230330	8	NDST4	0	intronic	0.689	NA	15	15	1	0	1
4:115982016:C:T	rs561736	4	115982016	C	T	0.3337	0.0127966	-0.544658	0.218022	0.314685	rs59230330	8	NDST4	0	intronic	0.092	NA	15	15	1	0	1
4:116002697:A:C	rs563820	4	116002697	A	C	0.3403	0.0128077	-0.541168	0.216652	0.302943	rs59230330	8	NDST4	0	intronic	0.075	NA	9	15	1	0	1
1:173254253:C:T	rs12142308	1	173254253	T	C	0.07328	0.0129056	-0.712073	0.285385	0.436226	rs72724954	3	snoU13	3943	intergenic	1.396	3a	14	15	1	0	1
4:116001811:C:CA	rs35031671	4	116001811	C	CA	0.3401	0.0129901	-0.540078	0.216657	0.303267	rs59230330	8	NDST4	0	intronic	1.453	NA	15	15	1	0	1
4:116009178:C:T	rs581288	4	116009178	T	C	0.3015	0.0131372	-0.548046	0.220211	0.414192	rs59230330	8	NDST4	0	intronic	1.386	NA	15	15	1	0	1
4:14170826:A:G	rs76779142	4	14170826	A	G	0.08526	0.0131539	1.1688	0.469724	0.27796	rs1968315	6	RP11-669M16.1	0	ncRNA_intronic	12.66	2b	5	15	1	0	1
4:116007321:A:T	rs578131	4	116007321	T	A	0.3015	0.0131542	-0.547929	0.220205	0.414192	rs59230330	8	NDST4	0	intronic	5.414	6	9	15	1	0	1
14:51108109:T:TA	rs33964457	14	51108109	T	TA	0.4353	0.0131581	0.414806	0.166712	0.144529	rs12896268	19	SAV1	0	intronic	0.886	NA	4	5	1	0	1
4:116008043:G:T	rs550608	4	116008043	T	G	0.3015	0.0131847	-0.547761	0.220211	0.414192	rs59230330	8	NDST4	0	intronic	0.075	NA	15	15	1	0	1
6:110778128:C:T	rs714368	6	110778128	T	C	0.3139	0.0132057	-0.477573	0.192038	0.133609	rs221720	9	SLC22A16	0	exonic	0.002	NA	4	15	1	1	1
4:115999099:A:T	rs477076	4	115999099	A	T	0.3397	0.0132415	-0.537988	0.216417	0.303436	rs59230330	8	NDST4	0	intronic	4.707	6	14	15	1	0	1
4:115996988:C:T	rs509127	4	115996988	T	C	0.3399	0.0133167	-0.536257	0.215898	0.303112	rs59230330	8	NDST4	0	intronic	4.863	NA	14	15	1	0	1
4:14220006:A:C	rs3886068	4	14220006	A	C	0.1518	0.0133936	0.61075	0.246095	0.377377	rs1968315	6	RP11-669M16.1	0	ncRNA_intronic	0.93	6	5	15	1	1	1
19:13691369:A:G	rs4926301	19	13691369	G	A	0.1068	0.0134511	0.454479	0.183241	0.170313	rs7252743	21	CACNA1A	0	intronic	3.145	6	5	15	1	1	1
4:115969290:C:T	rs543088	4	115969290	C	T	0.244	0.0134972	-0.624282	0.251829	0.34863	rs59230330	8	NDST4	0	intronic	0.425	7	15	15	1	0	1
2:118928975:A:G	rs4848496	2	118928975	G	A	0.4193	0.0135019	-0.443725	0.179004	0.343224	rs2422177	4	AC093901.1	0	ncRNA_intronic	1.996	5	5	15	1	1	1
6:110777962:A:G	rs6907567	6	110777962	A	G	0.3141	0.0135137	-0.476975	0.192442	0.133243	rs221720	9	SLC22A16	0	exonic	0.544	7	4	15	1	1	1
23:80675128:A:G	rs2060931	23	80675128	A	G	0.1284	0.0135632	0.36129	0.145845	0.394608	rs73241354	22	RP13-52K8.1	0	ncRNA_intronic	3.561	7	9	15	1	1	1
4:67126645:A:G	rs434623	4	67126645	G	A	0.3914	0.0136546	-0.53737	0.217137	0.162617	rs67668930	7	MIR1269A	15896	intergenic	4.364	6	9	15	1	0	1
14:51082271:A:C	rs10144512	14	51082271	C	A	0.4641	0.0137571	0.414022	0.167478	0.207971	rs12896268	19	ATL1	0	intronic	0.054	5	2	15	1	1	1
2:118932484:A:G	rs4849681	2	118932484	G	A	0.4014	0.0138	-0.438219	0.177347	0.326872	rs2422177	4	AC093901.1	0	ncRNA_intronic	4.378	6	5	15	1	1	1
17:10075853:A:G	rs12936206	17	10075853	A	G	0.4437	0.0138224	-0.42763	0.173103	0.196485	rs8081398	20	GAS7	0	intronic	11	5	2	7	1	0	1
4:115956273:A:C	rs12647287	4	115956273	C	A	0.2033	0.0139726	-0.632622	0.25649	0.427218	rs59230330	8	NDST4	0	intronic	0.216	6	15	15	1	0	1
4:115958330:C:G	rs1471500	4	115958330	C	G	0.2037	0.0139958	-0.632682	0.256577	0.429214	rs59230330	8	NDST4	0	intronic	3.581	6	9	15	1	0	1
7:9533281:C:T	rs73050311	7	9533281	C	T	0.0613	0.0140577	-0.694013	0.281631	0.150269	rs77755643	10	AC079756.1	100965	intergenic	1.45	7	8	15	0	0	1
4:115993506:A:T	rs7671596	4	115993506	T	A	0.3399	0.0141859	-0.5326	0.216419	0.303592	rs59230330	8	NDST4	0	intronic	0.004	6	14	15	1	0	1
12:78416850:A:G	rs2619058	12	78416850	A	G	0.2017	0.0142637	-0.46355	0.188513	0.175347	rs5799370	17	NAV3	0	intronic	6.105	6	4	15	1	0	1
2:118927053:C:G	rs7604456	2	118927053	G	C	0.3692	0.0144305	-0.435288	0.177325	0.339374	rs2422177	4	AC093901.1	0	ncRNA_intronic	0.447	4	2	15	1	1	1
7:9532192:C:T	rs73050309	7	9532192	C	T	0.0613	0.0144924	-0.692531	0.282298	0.154399	rs77755643	10	AC079756.1	102054	intergenic	3.472	7	8	15	0	0	1
4:116054769:A:G	rs580538	4	116054769	G	A	0.3235	0.0144949	0.438475	0.178741	0.104391	rs59230330	8	MRPS33P3	9368	intergenic	3.575	7	14	15	1	0	1
7:9539547:C:G	rs9918523	7	9539547	C	G	0.0637	0.0145023	-0.692634	0.282368	0.142927	rs77755643	10	AC079756.1	94699	intergenic	0.161	6	9	15	0	0	1
4:14267563:C:G	rs17415755	4	14267563	C	G	0.02935	0.0145148	0.927559	0.378189	0.172048	rs1968315	6	RP11-669M16.1	23125	intergenic	7.478	7	5	15	1	0	1
10:133014759:C:T	rs10829950	10	133014759	T	C	0.2135	0.0145341	0.449038	0.18312	0.114725	rs2918132	14	TCERG1L	0	intronic	0.187	5	5	15	1	0	1
7:9539255:A:C	rs9918507	7	9539255	C	A	0.0607	0.0145613	-0.692132	0.282334	0.156117	rs77755643	10	AC079756.1	94991	intergenic	0.412	7	9	15	0	0	1
4:115982777:C:CA	rs149970368	4	115982777	C	CA	0.3373	0.0146704	-0.531851	0.217193	0.310286	rs59230330	8	NDST4	0	intronic	0.713	NA	15	15	1	0	1
23:80816940:A:G	rs146749581	23	80816940	G	A	0.1739	0.0147436	0.346983	0.141804	0.302467	rs73241354	22	XXyac-YR12DB5.1	38630	intergenic	3.189	6	9	15	1	1	1
7:9539207:A:C	rs9918564	7	9539207	A	C	0.0607	0.0147764	-0.690938	0.282463	0.156117	rs77755643	10	AC079756.1	95039	intergenic	3.478	6	9	15	0	0	1
4:67125863:C:T	rs364705	4	67125863	C	T	0.3962	0.0147884	-0.532508	0.217721	0.160791	rs67668930	7	MIR1269A	16678	intergenic	2.635	NA	9	15	1	0	1
2:118933126:A:G	rs9678202	2	118933126	A	G	0.4287	0.0148826	-0.435674	0.178299	0.333768	rs2422177	4	AC093901.1	0	ncRNA_intronic	1.724	5	5	14	1	1	1
7:9539768:C:G	rs9918627	7	9539768	G	C	0.0647	0.0148919	-0.690622	0.282662	0.143403	rs77755643	10	AC079756.1	94478	intergenic	0.403	5	9	15	0	0	1
2:118944975:C:T	rs6729320	2	118944975	T	C	0.4299	0.0149659	-0.435256	0.178276	0.336662	rs2422177	4	AC093901.1	1012	intergenic	0.136	1f	5	14	1	1	1
2:118936738:A:G	rs11689679	2	118936738	A	G	0.4279	0.0149909	-0.435233	0.178312	0.330474	rs2422177	4	AC093901.1	0	ncRNA_intronic	0.009	7	5	15	1	1	1
23:80940785:A:T	rs140357657	23	80940785	T	A	0.04812	0.0150342	0.582817	0.238879	0.388308	rs73241354	22	XXyac-YR12DB5.1	83979	intergenic	0.695	7	9	15	0	0	1
4:115976205:C:T	rs534014	4	115976205	C	T	0.3393	0.0150524	-0.529217	0.216949	0.30851	rs59230330	8	NDST4	0	intronic	1.716	4	15	15	1	0	1
4:115976199:A:C	rs533585	4	115976199	A	C	0.3393	0.0150644	-0.52916	0.216952	0.30851	rs59230330	8	NDST4	0	intronic	2.656	NA	15	15	1	0	1
19:13692602:C:T	rs11668370	19	13692602	T	C	0.3073	0.0154618	-0.40319	0.165954	0.527232	rs7252743	21	CACNA1A	0	intronic	1.872	5	5	15	1	0	1
4:14177198:A:G	rs28718545	4	14177198	A	G	0.1326	0.0155819	1.04566	0.430899	0.126731	rs1968315	6	RP11-669M16.1	0	ncRNA_intronic	9.178	7	2	15	1	0	1
4:14176727:A:T	rs77101113	4	14176727	T	A	0.1326	0.0155923	1.04564	0.430933	0.125637	rs1968315	6	RP11-669M16.1	0	ncRNA_intronic	0.141	7	1	15	1	0	1
4:14175613:A:T	rs76394227	4	14175613	A	T	0.1346	0.0155985	1.04549	0.430898	0.12262	rs1968315	6	RP11-669M16.1	0	ncRNA_intronic	3.257	5	1	15	1	0	1
1:54608119:A:G	rs1571540	1	54608119	G	A	0.2951	0.0156088	-0.408842	0.168521	0.140341	rs954878	1	CDCP2:RP11-446E24.4	00:00:00	intronic	2.674	4	7	15	1	0	1
4:115979468:C:T	rs516638	4	115979468	T	C	0.3275	0.0156634	-0.530707	0.218868	0.335836	rs59230330	8	NDST4	0	intronic	6.108	NA	15	15	1	0	1
4:115960925:C:G	rs9884962	4	115960925	G	C	0.2039	0.0156815	-0.623772	0.257294	0.429978	rs59230330	8	NDST4	0	intronic	0.448	6	14	15	1	0	1
7:9540039:A:C	rs17161703	7	9540039	C	A	0.04792	0.0157043	-0.697325	0.287697	0.19892	rs77755643	10	AC079756.1	94207	intergenic	2.046	7	9	15	0	0	1
14:51162419:A:G	rs8023035	14	51162419	G	A	0.4962	0.0157656	0.399424	0.164888	0.147029	rs12896268	19	ZFP64P1	8641	intergenic	1.05	7	9	15	1	1	1
23:80663456:C:G	rs145838265	23	80663456	G	C	0.02536	0.0158269	0.894086	0.36931	0.22995	rs73241354	22	RP13-52K8.1	980	upstream	1.424	5	9	15	1	0	1
10:133017232:A:G	rs11017825	10	133017232	G	A	0.2216	0.0158333	0.446508	0.184446	0.108845	rs2918132	14	TCERG1L	0	intronic	3.11	4	9	15	1	0	1
23:80798215:A:G	rs17281832	23	80798215	A	G	0.1741	0.0158896	0.343327	0.1419	0.302275	rs73241354	22	XXyac-YR12DB5.1	57355	intergenic	1.796	7	9	15	0	1	0
4:115972469:G:T	rs1383002	4	115972469	G	T	0.2504	0.0160627	-0.607106	0.251336	0.32911	rs59230330	8	NDST4	0	intronic	0.213	NA	15	15	1	0	1
4:115978990:C:T	rs542287	4	115978990	T	C	0.3359	0.0161692	-0.526142	0.218038	0.313037	rs59230330	8	NDST4	0	intronic	0.477	NA	15	15	1	0	1
4:14244734:C:T	rs79592047	4	14244734	C	T	0.04233	0.0162098	0.776167	0.321773	0.108327	rs1968315	6	RP11-669M16.1	296	downstream	0.013	7	5	15	1	1	1
4:14239671:G:GA	rs139189461	4	14239671	GA	G	0.04213	0.0162532	0.775936	0.321809	0.109274	rs1968315	6	RP11-669M16.1	0	ncRNA_intronic	2.897	NA	5	15	1	1	1
4:14239849:C:T	rs76466956	4	14239849	C	T	0.04233	0.0162669	0.775883	0.321828	0.108327	rs1968315	6	RP11-669M16.1	0	ncRNA_intronic	0.444	5	5	15	1	1	1
19:13705066:A:C	rs147644082	19	13705066	C	A	0.267	0.016322	-0.519787	0.215714	0.216697	rs7252743	21	CACNA1A	0	intronic	5.736	7	5	15	1	0	1
4:115964380:A:G	rs2046050	4	115964380	A	G	0.2039	0.0164091	-0.622875	0.258707	0.429978	rs59230330	8	NDST4	0	intronic	3.175	NA	9	15	1	0	1
23:80785228:C:T	rs73634762	23	80785228	C	T	0.1799	0.0164525	0.341138	0.141747	0.293679	rs73241354	22	XXyac-YR12DB5.1	70342	intergenic	3.971	7	9	15	0	0	0
23:81856653:C:CT	rs201298455	23	81856653	C	CT	0.02536	0.0164844	0.729225	0.303092	0.157529	rs73241354	22	SNORA4	39856	intergenic	1.981	NA	9	15	1	0	1
4:115970297:G:T	rs573421	4	115970297	T	G	0.25	0.0165123	-0.604482	0.251309	0.330686	rs59230330	8	NDST4	0	intronic	4.032	NA	9	15	1	0	1
14:51090115:G:T	rs6572678	14	51090115	G	T	0.4645	0.0166656	0.400637	0.166799	0.205494	rs12896268	19	ATL1	0	intronic	10.21	6	4	5	1	1	1
14:51090295:A:G	rs4901044	14	51090295	G	A	0.4645	0.0166759	0.400604	0.166801	0.205494	rs12896268	19	ATL1	0	intronic	6.713	6	4	5	1	1	1
4:116004249:G:T	rs481915	4	116004249	G	T	0.3403	0.0167964	-0.520664	0.217032	0.302943	rs59230330	8	NDST4	0	intronic	2.832	NA	9	15	1	0	1
4:14221055:C:T	rs16889857	4	14221055	T	C	0.1418	0.0168391	0.610014	0.254377	0.418283	rs1968315	6	RP11-669M16.1	0	ncRNA_intronic	0.209	7	7	15	1	0	1
4:115986538:G:T	rs498347	4	115986538	G	T	0.3437	0.0170671	-0.520222	0.217385	0.292809	rs59230330	8	NDST4	0	intronic	1.293	NA	9	15	1	0	1
14:50848893:A:G	rs28639976	14	50848893	G	A	0.2432	0.017127	0.406975	0.170155	0.187816	rs12896268	19	CDKL1	0	intronic	4.359	6	2	15	1	1	1
2:118927576:G:GT	rs35699698	2	118927576	G	GT	0.3884	0.0171876	-0.424957	0.177771	0.325007	rs2422177	4	AC093901.1	0	ncRNA_intronic	3.346	NA	2	15	1	0	1
12:78413854:A:G	rs11107890	12	78413854	G	A	0.09545	0.0172536	-0.602038	0.251998	0.142382	rs5799370	17	NAV3	0	intronic	1.475	6	5	15	1	0	1
23:81074692:C:T	rs56197343	23	81074692	C	T	0.1971	0.0172861	0.337476	0.141301	0.276146	rs73241354	22	RNU6-974P	181976	intergenic	0.084	6	9	15	0	1	0
4:115952546:A:T	rs35758538	4	115952546	T	A	0.2037	0.0173164	-0.612416	0.256487	0.429214	rs59230330	8	NDST4	0	intronic	6.432	6	9	15	1	0	1
4:115953893:A:C	rs1479799	4	115953893	C	A	0.2039	0.0173175	-0.612423	0.256493	0.42854	rs59230330	8	NDST4	0	intronic	3.009	NA	14	15	1	0	1
4:115952625:A:T	rs36126200	4	115952625	T	A	0.2037	0.0173182	-0.612408	0.256488	0.429214	rs59230330	8	NDST4	0	intronic	1.813	7	9	15	1	0	1
14:51091267:C:T	rs8011039	14	51091267	T	C	0.4623	0.0174271	0.397162	0.166501	0.2012	rs12896268	19	ATL1	0	intronic	0.77	3a	4	5	1	1	1
17:10081221:C:T	rs9899530	17	10081221	T	C	0.4401	0.0174651	-0.382018	0.160207	0.173388	rs8081398	20	GAS7	0	intronic	3.229	7	1	7	1	0	1
4:115951030:A:T	rs7437758	4	115951030	A	T	0.2037	0.0175087	-0.608236	0.255176	0.427776	rs59230330	8	NDST4	0	intronic	5.035	7	9	15	1	0	1
4:115948716:A:T	rs7676598	4	115948716	T	A	0.2037	0.0175806	-0.607855	0.25518	0.427776	rs59230330	8	NDST4	0	intronic	2.128	6	9	15	1	0	1
7:9540060:A:G	rs17208597	7	9540060	G	A	0.03035	0.0176843	-0.709421	0.298092	0.304072	rs77755643	10	AC079756.1	94186	intergenic	0.219	7	9	15	0	0	1
14:50849032:A:G	rs28487292	14	50849032	G	A	0.2708	0.0176939	0.407034	0.171046	0.203077	rs12896268	19	CDKL1	0	intronic	0.523	7	1	15	1	1	1
23:81036880:C:G	rs56232231	23	81036880	G	C	0.1973	0.0177543	0.336183	0.141348	0.276981	rs73241354	22	XXyac-YR12DB5.1	180074	intergenic	1.33	7	9	15	0	1	1
2:119006422:A:G	rs10186364	2	119006422	G	A	0.2865	0.0177555	-0.545771	0.229472	0.245996	rs2422177	4	AC093901.1	62459	intergenic	8.112	7	5	14	0	1	1
23:81026915:A:ATAACCCTGATGTTATTAT	rs199527474	23	81026915	ATAACCCTGATGTTATTAT	A	0.1971	0.0177678	0.336251	0.141393	0.276146	rs73241354	22	XXyac-YR12DB5.1	170109	intergenic	1.491	NA	9	15	0	1	1
14:51091443:C:T	rs8012530	14	51091443	C	T	0.4593	0.0177696	0.395895	0.166476	0.201406	rs12896268	19	ATL1	0	intronic	3.184	3a	4	5	1	1	1
4:115987955:A:G	rs567976	4	115987955	G	A	0.3444	0.0178032	-0.516172	0.217118	0.291092	rs59230330	8	NDST4	0	intronic	0.797	NA	9	15	1	0	1
23:80580087:A:G	rs142964582	23	80580087	A	G	0.02556	0.0178854	0.893094	0.375935	0.236326	rs73241354	22	SH3BGRL	26040	intergenic	3.293	6	4	15	1	0	1
13:54905768:A:G	rs7325415	13	54905768	A	G	0.2478	0.0179122	-0.405898	0.170897	0.193003	rs11619037	18	RPL13AP25	109070	intergenic	0.169	6	5	15	0	0	1
23:81018713:C:T	rs112227329	23	81018713	C	T	0.1971	0.017918	0.335827	0.141402	0.276146	rs73241354	22	XXyac-YR12DB5.1	161907	intergenic	0.361	6	9	15	0	0	1
23:80849764:A:G	rs149799084	23	80849764	A	G	0.1743	0.0182889	0.336886	0.142307	0.30548	rs73241354	22	XXyac-YR12DB5.1	5806	intergenic	3.893	7	9	15	1	1	1
4:115977631:A:T	rs524021	4	115977631	A	T	0.3393	0.0183468	-0.513177	0.216884	0.30851	rs59230330	8	NDST4	0	intronic	9.72	7	15	15	1	0	1
23:81089160:G:T	rs112989589	23	81089160	T	G	0.1963	0.0184853	0.334332	0.141467	0.273703	rs73241354	22	RNU6-974P	167508	intergenic	1.571	7	9	15	0	0	0
23:80847492:G:T	rs111861212	23	80847492	G	T	0.1739	0.0185159	0.336929	0.142603	0.303009	rs73241354	22	XXyac-YR12DB5.1	8078	intergenic	1.584	6	14	15	1	1	1
14:51083594:C:T	rs4901043	14	51083594	C	T	0.4645	0.0185657	0.393626	0.166671	0.205782	rs12896268	19	ATL1	0	intronic	6.09	7	4	15	1	1	1
14:51084860:A:G	rs34061700	14	51084860	A	G	0.4651	0.0185926	0.393545	0.166675	0.206706	rs12896268	19	ATL1	0	intronic	5.503	6	4	15	1	1	1
12:78422545:C:T	rs61936196	12	78422545	C	T	0.09565	0.0186262	-0.600493	0.254395	0.146174	rs5799370	17	NAV3	0	intronic	4.713	4	4	15	1	0	1
3:14359963:G:T	rs11719407	3	14359963	T	G	0.1308	0.018671	-0.531931	0.225435	0.100034	rs13091718	5	RP11-536I6.2	14617	intergenic	0.357	6	5	14	1	0	1
14:51092554:A:G	rs12587821	14	51092554	G	A	0.4643	0.018696	0.393073	0.166622	0.205066	rs12896268	19	ATL1	0	intronic	3.359	7	4	5	1	1	1
14:51092562:A:G	rs12587842	14	51092562	G	A	0.4643	0.018696	0.393073	0.166622	0.205066	rs12896268	19	ATL1	0	intronic	3.035	7	4	5	1	1	1
14:51081449:C:T	rs1389650	14	51081449	T	C	0.4659	0.0187512	0.392883	0.16662	0.204805	rs12896268	19	ATL1	0	intronic	1.259	7	4	15	1	1	1
4:116321279:A:G	rs80278799	4	116321279	G	A	0.03474	0.0190405	-0.770462	0.327548	0.103773	rs59230330	8	RPF2P2	228688	intergenic	10.72	7	9	15	0	0	1
14:51087263:A:G	rs11157759	14	51087263	G	A	0.496	0.0191273	0.391988	0.166768	0.191414	rs12896268	19	ATL1	0	intronic	0.528	4	5	15	1	1	1
4:14230390:C:G	rs6449006	4	14230390	G	C	0.259	0.0192029	0.521483	0.222	0.180554	rs1968315	6	RP11-669M16.1	0	ncRNA_intronic	1.575	6	5	15	1	0	1
14:51046040:C:G	rs7152874	14	51046040	G	C	0.4407	0.0192112	0.39177	0.166792	0.21066	rs12896268	19	ATL1	0	intronic	10.84	7	5	15	1	1	1
4:115971329:C:T	rs494047	4	115971329	T	C	0.2524	0.0192745	-0.584587	0.249013	0.326647	rs59230330	8	NDST4	0	intronic	0.927	7	15	15	1	0	1
14:51052118:C:T	rs3825571	14	51052118	C	T	0.4403	0.0192986	0.39135	0.166734	0.211276	rs12896268	19	ATL1	0	intronic	8.979	NA	5	15	1	1	1
13:54908246:A:G	rs4492932	13	54908246	G	A	0.2859	0.0194694	-0.395665	0.168812	0.148642	rs11619037	18	RPL13AP25	106592	intergenic	1.751	7	5	15	0	0	1
13:54908675:C:T	rs2785949	13	54908675	T	C	0.2877	0.0195099	-0.395496	0.168796	0.147329	rs11619037	18	RPL13AP25	106163	intergenic	1.045	7	5	15	0	0	1
17:10051201:C:T	rs2051667	17	10051201	T	C	0.3261	0.0196505	-0.389053	0.166238	0.170497	rs12935988	20	GAS7	0	intronic	0.177	5	5	15	1	0	1
23:80731058:C:G	rs113016277	23	80731058	C	G	0.1659	0.0197597	0.333415	0.142592	0.309796	rs73241354	22	RP13-52K8.1	48282	intergenic	0.15	6	9	15	1	1	1
14:51046474:A:G	rs10136630	14	51046474	A	G	0.4557	0.01988	0.389905	0.166915	0.224947	rs12896268	19	ATL1	0	intronic	0.193	7	5	15	1	1	1
13:54909547:G:T	rs2818209	13	54909547	G	T	0.2857	0.0198949	-0.394225	0.168785	0.149051	rs11619037	18	RPL13AP25	105291	intergenic	0.158	6	5	15	0	0	1
4:116316181:C:T	rs79438295	4	116316181	C	T	0.03554	0.019902	-0.765089	0.327587	0.103955	rs59230330	8	RPF2P2	233786	intergenic	1.38	7	9	15	0	0	1
23:80712032:C:T	rs112917533	23	80712032	C	T	0.1679	0.0199747	0.332847	0.142599	0.302118	rs73241354	22	RP13-52K8.1	29256	intergenic	0.282	5	9	15	1	1	1
14:50867021:A:G	rs4901032	14	50867021	G	A	0.3301	0.020509	0.399496	0.17189	0.290236	rs12896268	19	CDKL1	0	intergenic	4.96	5	5	15	1	1	1
14:51132533:G:T	rs35637875	14	51132533	G	T	0.4866	0.0208447	0.385177	0.16617	0.15908	rs12896268	19	SAV1	0	intronic	9.966	6	1	5	1	1	1
4:116147961:C:G	rs10857037	4	116147961	G	C	0.4834	0.0208689	0.389967	0.168268	0.216237	rs59230330	8	MRPS33P3	83501	intergenic	11.67	6	5	15	0	0	1
4:116145311:A:G	rs1995733	4	116145311	G	A	0.4832	0.0209218	0.3898	0.168266	0.216423	rs59230330	8	MRPS33P3	80851	intergenic	2.921	NA	5	15	0	0	1
14:50870033:A:G	rs17717642	14	50870033	G	A	0.3297	0.0209264	0.397441	0.171571	0.28901	rs12896268	19	CDKL1	0	intergenic	1.785	5	5	15	1	1	1
17:10051143:A:G	rs2051668	17	10051143	G	A	0.3259	0.0209647	-0.385641	0.166527	0.170638	rs12935988	20	GAS7	0	intronic	5.627	NA	5	15	1	0	1
17:10069082:A:G	rs7226125	17	10069082	G	A	0.3297	0.0211197	-0.411191	0.177775	0.260272	rs8081398	20	GAS7	0	intronic	0.26	6	5	15	1	0	1
4:14226586:A:G	rs11937715	4	14226586	A	G	0.1374	0.0214287	0.591323	0.256267	0.404774	rs1968315	6	RP11-669M16.1	0	ncRNA_intronic	5.213	7	5	15	1	1	1
14:51081515:C:T	rs1353204	14	51081515	T	C	0.4365	0.0214688	0.386596	0.167594	0.17592	rs12896268	19	ATL1	0	intronic	1.515	6	4	15	1	1	1
14:50849486:A:AT	rs112937091	14	50849486	AT	A	0.2388	0.0214708	0.395627	0.171512	0.207791	rs12896268	19	CDKL1	0	intronic	0.527	NA	2	15	1	0	1
4:14225189:G:T	rs11940373	4	14225189	G	T	0.1368	0.0215385	0.590743	0.256233	0.403469	rs1968315	6	RP11-669M16.1	0	ncRNA_intronic	0.267	5	5	15	1	0	1
4:14220870:A:G	rs79976102	4	14220870	A	G	0.1368	0.021738	0.589822	0.256225	0.404692	rs1968315	6	RP11-669M16.1	0	ncRNA_intronic	0.15	5	2	15	1	1	1
4:14226629:A:G	rs11937725	4	14226629	A	G	0.1372	0.0217545	0.590455	0.256532	0.403704	rs1968315	6	RP11-669M16.1	0	ncRNA_intronic	4.907	7	5	15	1	1	1
23:80750799:A:G	rs111687189	23	80750799	A	G	0.1691	0.021789	0.327966	0.142527	0.303188	rs73241354	22	RP13-52K8.1	68023	intergenic	8.629	5	9	15	0	0	1
3:14407960:A:G	rs1871852	3	14407960	G	A	0.4483	0.0218322	-0.379641	0.165039	0.117504	rs13091718	5	RP11-536I6.1	13891	intergenic	5.853	4	5	15	1	0	1
14:51162848:C:T	rs4343181	14	51162848	T	C	0.4245	0.0221668	0.384748	0.167683	0.107386	rs12896268	19	ZFP64P1	8212	intergenic	0.734	3a	9	15	1	1	1
1:173179174:C:T	rs72722853	1	173179174	T	C	0.01637	0.0222157	-0.866144	0.377627	0.172732	rs72724954	3	TNFSF4	2721	intergenic	3.721	6	5	15	1	0	1
1:173174389:A:G	rs12730413	1	173174389	G	A	0.01637	0.0222592	-0.866378	0.377853	0.172732	rs72724954	3	TNFSF4	0	intronic	3.171	5	1	15	1	0	1
3:14401563:A:G	rs6796254	3	14401563	G	A	0.3059	0.022344	-0.408596	0.178314	0.124323	rs13091718	5	RP11-536I6.1	7494	intergenic	0.762	5	5	15	1	0	1
14:51078585:A:G	rs7144714	14	51078585	A	G	0.4589	0.0223647	0.381604	0.16656	0.202957	rs12896268	19	ATL1	0	intronic	1.146	6	5	15	1	1	1
4:14167729:C:CT	rs144137500	4	14167729	C	CT	0.1356	0.0225151	0.974992	0.426038	0.11985	rs1968315	6	RP11-669M16.1	0	ncRNA_intronic	2.411	NA	1	15	1	0	1
4:14167575:A:T	rs12512162	4	14167575	T	A	0.1354	0.0225454	0.974559	0.425945	0.120627	rs1968315	6	RP11-669M16.1	0	ncRNA_intronic	2.23	4	1	15	1	0	1
4:14167627:C:G	rs12507376	4	14167627	C	G	0.1354	0.0225454	0.974559	0.425945	0.120627	rs1968315	6	RP11-669M16.1	0	ncRNA_intronic	1.255	4	1	15	1	0	1
4:14172586:A:G	rs28843397	4	14172586	G	A	0.1358	0.0225454	0.974559	0.425945	0.120891	rs1968315	6	RP11-669M16.1	0	ncRNA_intronic	0.756	7	5	15	1	0	1
4:14173580:G:T	rs28793989	4	14173580	T	G	0.1356	0.0225454	0.974559	0.425945	0.121291	rs1968315	6	RP11-669M16.1	0	ncRNA_intronic	3.577	5	5	15	1	0	1
4:14172284:C:G	rs61126662	4	14172284	G	C	0.1356	0.0225487	0.974585	0.425966	0.121291	rs1968315	6	RP11-669M16.1	0	ncRNA_intronic	0.654	6	5	15	1	0	1
4:14167488:A:G	rs12499480	4	14167488	G	A	0.1352	0.0225586	0.974439	0.425934	0.121026	rs1968315	6	RP11-669M16.1	0	ncRNA_intronic	4.503	4	1	15	1	0	1
4:67233221:A:C	rs11937576	4	67233221	A	C	0.128	0.0226301	-1.29213	0.565098	0.150485	rs67668930	7	RPS23P3	63588	intergenic	19.71	6	9	15	0	0	1
4:14172547:A:C	rs28769893	4	14172547	A	C	0.1356	0.0226332	0.974081	0.426014	0.121291	rs1968315	6	RP11-669M16.1	0	ncRNA_intronic	1.204	7	5	15	1	0	1
6:110794919:G:T	rs5029492	6	110794919	T	G	0.1558	0.0229023	-0.68601	0.300624	0.113664	rs221720	9	SLC22A16	0	intronic	2.703	7	5	14	1	0	1
6:110797952:A:T	rs72542460	6	110797952	A	T	0.1304	0.0229445	-0.686009	0.300717	0.159223	rs221720	9	SLC22A16	107	upstream	2.153	NA	1	14	1	1	1
4:67127145:G:T	rs380769	4	67127145	T	G	0.36	0.0230805	-0.505423	0.221777	0.149497	rs67668930	7	MIR1269A	15396	intergenic	0.076	NA	9	15	1	0	1
6:110795117:G:T	rs4543405	6	110795117	G	T	0.1558	0.0230853	-0.681493	0.299046	0.113006	rs221720	9	SLC22A16	0	intronic	1.063	7	5	14	1	1	1
4:14240322:A:G	rs9992568	4	14240322	A	G	0.2073	0.0231013	0.614824	0.269823	0.235032	rs1968315	6	RP11-669M16.1	0	ncRNA_intronic	1.226	6	5	15	1	0	1
1:54609689:A:G	rs33981514	1	54609689	G	A	0.4537	0.0232938	0.378394	0.166296	0.113156	rs954878	1	CDCP2:RP11-446E24.4	00:00:00	UTR3	6.89	5	5	15	1	0	1
6:110793985:A:T	rs72939941	6	110793985	T	A	0.1563	0.0233141	-0.681779	0.299671	0.112618	rs221720	9	SLC22A16	0	intronic	1.419	6	5	14	1	1	1
6:110794092:C:T	rs17071722	6	110794092	C	T	0.1562	0.0233141	-0.681779	0.299671	0.111699	rs221720	9	SLC22A16	0	intronic	3.081	6	5	14	1	1	1
6:110795136:A:G	rs1548408	6	110795136	A	G	0.1558	0.023322	-0.681786	0.299692	0.114165	rs221720	9	SLC22A16	0	intronic	0.915	NA	5	14	1	1	1
6:110794632:A:G	rs4541783	6	110794632	G	A	0.156	0.0233247	-0.681715	0.299667	0.111937	rs221720	9	SLC22A16	0	intronic	0.299	5	5	14	1	1	1
6:110794480:A:G	rs17071730	6	110794480	A	G	0.156	0.023329	-0.681667	0.299655	0.111937	rs221720	9	SLC22A16	0	intronic	3.281	5	5	14	1	1	1
6:110794489:C:G	rs17071731	6	110794489	C	G	0.1562	0.023329	-0.681667	0.299655	0.111699	rs221720	9	SLC22A16	0	intronic	2.13	5	5	14	1	1	1
6:110795128:A:C	rs1548409	6	110795128	A	C	0.1558	0.0233398	-0.681622	0.299659	0.114165	rs221720	9	SLC22A16	0	intronic	3.283	NA	5	14	1	1	1
23:80944806:A:G	rs143621097	23	80944806	A	G	0.1973	0.0233443	0.322422	0.14175	0.276534	rs73241354	22	XXyac-YR12DB5.1	88000	intergenic	0.898	7	9	15	0	0	1
14:51056600:C:T	rs1494181	14	51056600	T	C	0.4565	0.0234399	0.378569	0.16655	0.227002	rs12896268	19	ATL1	0	intronic	0.619	NA	4	15	1	1	1
14:51070812:T:TA	rs5808560	14	51070812	T	TA	0.4651	0.0234599	0.379327	0.166907	0.208668	rs12896268	19	ATL1	0	intronic	6.284	NA	4	15	1	1	1
6:110794230:A:G	rs17071725	6	110794230	A	G	0.1571	0.02351	-0.680602	0.29958	0.110201	rs221720	9	SLC22A16	0	intronic	4.524	5	5	14	1	1	1
6:110794282:A:G	rs17071728	6	110794282	A	G	0.1562	0.02351	-0.680602	0.29958	0.111699	rs221720	9	SLC22A16	0	intronic	7.506	5	5	14	1	1	1
23:80971958:C:CAATT	rs200181851	23	80971958	CAATT	C	0.1975	0.0235359	0.321949	0.141738	0.277817	rs73241354	22	XXyac-YR12DB5.1	115152	intergenic	0.74	NA	9	15	0	1	1
4:14236012:G:T	rs1541757	4	14236012	T	G	0.2065	0.0236534	0.612005	0.269664	0.236286	rs1968315	6	RP11-669M16.1	0	ncRNA_intronic	6.104	5	5	15	1	0	1
4:14236754:C:G	rs16889900	4	14236754	C	G	0.2057	0.023845	0.610943	0.269567	0.230968	rs1968315	6	RP11-669M16.1	0	ncRNA_intronic	0.731	7	7	15	1	0	1
1:173182034:C:CATAA	rs145091932	1	173182034	CATAA	C	0.01637	0.0240132	-0.861222	0.380455	0.172732	rs72724954	3	TNFSF4	5581	intergenic	4.925	NA	5	15	1	0	1
19:13703998:A:AAAAC	rs150071180	19	13703998	AAAAC	A	0.3241	0.0240288	-0.476458	0.210504	0.179918	rs7252743	21	CACNA1A	0	intronic	3.662	NA	5	15	1	0	1
2:119010201:A:C	rs13005524	2	119010201	C	A	0.3387	0.024092	-0.507129	0.224156	0.257758	rs2422177	4	AC093901.1	66238	intergenic	2.994	7	5	14	0	0	1
4:115977218:C:T	rs499404	4	115977218	C	T	0.3508	0.0241084	-0.489455	0.216369	0.275603	rs59230330	8	NDST4	0	intronic	0.247	6	15	15	1	0	1
3:14347926:A:G	rs4684202	3	14347926	A	G	0.3534	0.0242326	-0.411461	0.182051	0.109077	rs13091718	5	RP11-536I6.2	2580	intergenic	4.343	5	5	14	1	0	1
3:14347927:A:T	rs4685121	3	14347927	T	A	0.3534	0.0242326	-0.411461	0.182051	0.109077	rs13091718	5	RP11-536I6.2	2581	intergenic	5.381	5	5	14	1	0	1
4:116099790:C:T	rs4834458	4	116099790	T	C	0.3774	0.0242846	0.396389	0.175447	0.110084	rs59230330	8	MRPS33P3	35330	intergenic	3.916	7	9	15	1	0	1
6:110762826:C:G	rs221712	6	110762826	G	C	0.3167	0.0242913	-0.407594	0.180415	0.131195	rs221720	9	SLC22A16	0	intronic	0.029	6	4	15	1	0	1
13:54907810:T:TA	rs5803690	13	54907810	T	TA	0.2863	0.0243824	-0.382157	0.169264	0.141852	rs11619037	18	RPL13AP25	107028	intergenic	0.54	NA	4	15	0	0	1
19:13702410:C:T	rs2112462	19	13702410	T	C	0.3059	0.0245003	-0.378818	0.167925	0.510772	rs7252743	21	CACNA1A	0	intronic	0.417	NA	5	15	1	0	1
10:133000361:C:T	rs72849729	10	133000361	T	C	0.0617	0.0246181	0.549809	0.243924	0.186961	rs2918132	14	TCERG1L	0	intronic	6.563	5	5	15	1	0	1
14:51075197:G:GT	rs5808561	14	51075197	GT	G	0.4651	0.0246709	0.375564	0.166681	0.208668	rs12896268	19	ATL1	0	intronic	0.041	NA	2	15	1	1	1
14:51163494:A:G	rs7146084	14	51163494	G	A	0.4874	0.0246992	0.374436	0.166214	0.122481	rs12896268	19	ZFP64P1	7566	intergenic	1.593	7	9	15	1	1	1
6:110766308:C:T	rs7768417	6	110766308	T	C	0.3201	0.0252893	-0.396307	0.176643	0.128007	rs221720	9	SLC22A16	0	intronic	1.435	5	4	15	1	0	1
4:115979123:A:T	rs558868	4	115979123	A	T	0.3514	0.0252947	-0.485309	0.216322	0.272486	rs59230330	8	NDST4	0	intronic	0.499	7	15	15	1	0	1
7:9534167:A:T	rs17802136	7	9534167	T	A	0.04014	0.0257997	-0.627995	0.280889	0.245856	rs77755643	10	AC079756.1	100079	intergenic	3.306	7	9	15	0	0	1
4:115966407:A:G	rs17679753	4	115966407	G	A	0.2472	0.0262236	-0.55439	0.248676	0.283566	rs59230330	8	NDST4	0	intronic	1.706	5	15	15	1	0	1
4:115967228:A:G	rs580214	4	115967228	G	A	0.2474	0.026233	-0.554345	0.248672	0.283116	rs59230330	8	NDST4	0	intronic	0.841	NA	9	15	1	0	1
14:51123595:C:T	rs923908	14	51123595	T	C	0.4876	0.0263312	0.369364	0.165801	0.154415	rs12896268	19	SAV1	0	intronic	0.86	NA	5	5	1	1	1
23:80622104:A:G	rs55861599	23	80622104	G	A	0.1633	0.0264503	0.318986	0.143301	0.283702	rs73241354	22	RP11-346E8.1	2434	intergenic	0.06	7	7	15	1	1	1
14:51157614:C:T	rs12434932	14	51157614	C	T	0.4984	0.0268613	0.367809	0.165684	0.151712	rs12896268	19	ZFP64P1	13446	intergenic	5.745	7	5	15	1	1	1
7:9538325:C:G	rs17802386	7	9538325	G	C	0.03954	0.0273075	-0.623315	0.281603	0.259081	rs77755643	10	AC079756.1	95921	intergenic	0.862	7	15	15	0	0	1
6:110793735:A:G	rs72939939	6	110793735	A	G	0.06889	0.0273663	-0.733828	0.331658	0.26184	rs221720	9	SLC22A16	0	intronic	11.23	6	5	14	1	1	1
4:14227099:A:G	rs79758452	4	14227099	G	A	0.02995	0.0274118	0.821321	0.371311	0.161859	rs1968315	6	RP11-669M16.1	0	ncRNA_intronic	0.184	7	5	15	1	0	1
23:81765082:T:TA	rs200115949	23	81765082	TA	T	0.02975	0.0274556	0.777458	0.351581	0.253084	rs73241354	22	RPL22P22	2820	intergenic	1.676	NA	9	15	1	0	0
2:119010026:C:G	rs1517533	2	119010026	G	C	0.3387	0.0275387	-0.496629	0.224706	0.257758	rs2422177	4	AC093901.1	66063	intergenic	0.413	6	5	14	0	0	1
4:14217115:C:G	rs113196352	4	14217115	G	C	0.03694	0.0276094	0.814968	0.368911	0.108674	rs1968315	6	RP11-669M16.1	0	ncRNA_intronic	5.482	5	9	15	1	0	1
4:14218412:C:G	rs111833106	4	14218412	C	G	0.03694	0.0276153	0.814892	0.368891	0.109834	rs1968315	6	RP11-669M16.1	0	ncRNA_intronic	1.107	7	5	15	1	0	1
6:110793870:A:G	rs17071719	6	110793870	G	A	0.156	0.0276425	-0.676132	0.30613	0.112263	rs221720	9	SLC22A16	0	intronic	0.42	1f	5	14	1	1	1
6:110805322:A:C	rs72941985	6	110805322	A	C	0.1348	0.0277272	-0.617589	0.279777	0.135512	rs221720	9	CTA-331P3.1	4682	intergenic	0.037	6	5	15	1	1	0
6:110804517:A:T	rs72941982	6	110804517	T	A	0.134	0.0279417	-0.616581	0.279706	0.137218	rs221720	9	CTA-331P3.1	3877	intergenic	5.827	4	5	15	1	1	0
1:54488250:A:G	rs35109297	1	54488250	A	G	0.4902	0.0282767	-0.362567	0.164827	0.125839	rs954878	1	RP4-758J24.5	4105	intergenic	11.21	7	5	15	1	1	1
14:51125240:C:T	rs1389652	14	51125240	C	T	0.4886	0.0284174	0.366268	0.166659	0.164056	rs12896268	19	SAV1	0	intronic	1.965	NA	1	5	1	1	1
4:116141570:A:ATGT	rs35737052	4	116141570	A	ATGT	0.4836	0.0284514	0.369736	0.168273	0.21725	rs59230330	8	MRPS33P3	77110	intergenic	1.742	NA	2	15	0	0	1
19:13688070:C:T	rs4926300	19	13688070	T	C	0.3085	0.0288863	-0.364458	0.166326	0.476582	rs7252743	21	CACNA1A	0	intronic	8.496	6	4	9	1	0	1
4:14128112:C:T	rs79804099	4	14128112	C	T	0.05172	0.0289617	1.11935	0.511074	0.162308	rs1968315	6	LINC01085:KLF17P2	00:00:00	ncRNA_exonic	0.298	7	2	15	1	0	1
1:54488948:C:T	rs6703501	1	54488948	T	C	0.4944	0.0290466	-0.361039	0.164931	0.189613	rs954878	1	RP4-758J24.5	3407	intergenic	5.633	5	5	15	1	0	1
14:51062455:A:G	rs10131107	14	51062455	A	G	0.4593	0.0297462	0.36411	0.167057	0.202357	rs12896268	19	ATL1	0	intronic	1.887	6	4	15	1	1	1
4:14211183:C:G	rs184543412	4	14211183	C	G	0.03774	0.029754	0.812803	0.372939	0.105734	rs1968315	6	RP11-669M16.1	0	ncRNA_intronic	0.176	7	14	15	1	0	1
14:50867940:C:T	rs12894097	14	50867940	C	T	0.3313	0.0298016	0.374683	0.171967	0.29547	rs12896268	19	CDKL1	0	intergenic	0.074	7	5	15	1	1	1
4:14206674:C:T	rs114439794	4	14206674	C	T	0.03854	0.0298451	0.812379	0.372953	0.107169	rs1968315	6	RP11-669M16.1	0	ncRNA_intronic	0.166	6	5	15	1	0	1
14:51108427:C:T	rs3015502	14	51108427	C	T	0.4852	0.0298703	0.362528	0.166458	0.155909	rs12896268	19	SAV1	0	intronic	4.924	NA	4	5	1	1	1
10:133001925:C:G	rs2944480	10	133001925	C	G	0.09505	0.0299525	0.672698	0.309031	0.144587	rs2918132	14	TCERG1L	0	intronic	2.472	7	5	15	1	0	1
19:13705718:C:T	rs4926165	19	13705718	C	T	0.3291	0.0299621	-0.371161	0.170517	0.522733	rs7252743	21	CACNA1A	0	intronic	4.518	7	5	15	1	0	1
4:67125392:C:T	rs34290534	4	67125392	T	C	0.2606	0.0300674	-0.510011	0.234458	0.149528	rs67668930	7	MIR1269A	17149	intergenic	5.796	7	9	15	1	0	1
4:14198545:A:G	rs80108275	4	14198545	A	G	0.03854	0.0301023	0.811452	0.373114	0.105365	rs1968315	6	RP11-669M16.1	0	ncRNA_intronic	5.623	7	9	15	1	0	1
4:14198992:A:G	rs79334263	4	14198992	G	A	0.03854	0.0302035	0.81073	0.373012	0.105365	rs1968315	6	RP11-669M16.1	0	ncRNA_intronic	3.223	5	9	15	1	0	1
4:14201285:C:T	rs1426103	4	14201285	T	C	0.03854	0.0302048	0.810725	0.373013	0.105365	rs1968315	6	RP11-669M16.1	0	ncRNA_intronic	1.5	NA	9	15	1	0	1
4:14201867:C:T	rs79333257	4	14201867	C	T	0.03834	0.0302048	0.810725	0.373013	0.106357	rs1968315	6	RP11-669M16.1	0	ncRNA_intronic	0.807	6	9	15	1	0	1
4:14185985:C:G	rs111886200	4	14185985	G	C	0.03894	0.0302654	0.810237	0.372925	0.105905	rs1968315	6	RP11-669M16.1	0	ncRNA_intronic	1.29	5	5	15	1	0	1
4:14187572:G:GA	rs143267217	4	14187572	GA	G	0.03874	0.0302722	0.810227	0.372936	0.106175	rs1968315	6	RP11-669M16.1	0	ncRNA_intronic	0.903	NA	5	15	1	0	1
7:108231939:A:G	rs142266817	7	108231939	G	A	0.01717	0.0302953	-1.04528	0.481194	0.291701	rs141901173	11	AC005487.2	6879	intergenic	5.784	5	5	15	1	0	1
7:108232395:C:T	rs114926712	7	108232395	C	T	0.01717	0.0302953	-1.04528	0.481194	0.291701	rs141901173	11	AC005487.2	6423	intergenic	4.938	5	5	15	1	0	1
7:108237589:G:GT	rs138285936	7	108237589	GT	G	0.01737	0.0303213	-1.04589	0.481553	0.288082	rs141901173	11	AC005487.2	1229	intergenic	1.58	NA	5	15	1	0	1
7:108238145:A:G	rs74460344	7	108238145	A	G	0.01777	0.0303213	-1.04589	0.481553	0.281083	rs141901173	11	AC005487.2	673	upstream	13.11	6	5	15	1	0	1
4:14191908:A:T	rs112332499	4	14191908	A	T	0.03874	0.0303873	0.809926	0.373058	0.106175	rs1968315	6	RP11-669M16.1	0	ncRNA_intronic	13.38	6	9	15	1	0	1
7:108229829:A:G	rs116844254	7	108229829	G	A	0.01697	0.0304304	-1.04392	0.480961	0.295403	rs141901173	11	AC005487.2	8989	intergenic	9.883	5	5	15	1	0	1
7:108227989:A:G	rs115815688	7	108227989	G	A	0.01797	0.0304865	-1.04368	0.481014	0.287244	rs141901173	11	AC005487.2	10829	intergenic	0.415	7	5	15	1	0	1
7:108228748:C:T	rs79001478	7	108228748	C	T	0.01797	0.0304865	-1.04368	0.481014	0.287244	rs141901173	11	AC005487.2	10070	intergenic	0.155	6	5	15	1	0	1
7:108230373:C:T	rs76762199	7	108230373	C	T	0.01797	0.0305415	-1.04326	0.480981	0.287244	rs141901173	11	AC005487.2	8445	intergenic	0.509	5	5	15	1	0	1
19:13684717:C:T	rs7259535	19	13684717	C	T	0.2628	0.0310902	0.368255	0.17034	0.319479	rs7252743	21	CACNA1A	0	intronic	2.102	6	5	15	1	0	1
6:110814152:G:GCCCACTCACAC	rs148765158	6	110814152	GCCCACTCACAC	G	0.1102	0.0311681	-0.609449	0.282037	0.185842	rs221720	9	CTA-331P3.1	13512	intergenic	5.329	NA	5	15	1	1	0
6:110814166:C:T	rs78223154	6	110814166	C	T	0.1106	0.0311681	-0.609449	0.282037	0.189305	rs221720	9	CTA-331P3.1	13526	intergenic	7.11	2b	5	15	1	1	0
14:51102351:A:G	rs8003372	14	51102351	A	G	0.4878	0.0312638	0.359712	0.16656	0.165002	rs12896268	19	SAV1	0	intronic	11.55	7	4	5	1	1	1
7:9539975:C:T	rs73052438	7	9539975	C	T	0.05811	0.0314306	-0.615173	0.28513	0.153209	rs77755643	10	AC079756.1	94271	intergenic	0.843	7	9	15	0	0	1
6:110809602:G:T	rs56387628	6	110809602	G	T	0.1116	0.0314635	-0.608321	0.282009	0.184839	rs221720	9	CTA-331P3.1	8962	intergenic	1.082	3a	5	15	1	1	0
4:116215498:A:AT	rs144909908	4	116215498	A	AT	0.2145	0.0316157	-0.420199	0.194973	0.581354	rs59230330	8	MRPS33P3	151038	intergenic	0.194	NA	15	15	0	0	1
14:51103052:C:CA	rs11327202	14	51103052	C	CA	0.4882	0.0316212	0.358862	0.166518	0.16544	rs12896268	19	SAV1	0	intronic	3.552	NA	4	5	1	1	1
14:51114051:C:T	rs3015496	14	51114051	C	T	0.4868	0.0316679	0.358209	0.166261	0.154503	rs12896268	19	SAV1	0	intronic	9.195	NA	2	5	1	1	1
4:14217074:C:T	rs9291624	4	14217074	T	C	0.112	0.0317265	0.789757	0.366689	0.239652	rs1968315	6	RP11-669M16.1	0	ncRNA_intronic	8.948	5	9	15	1	1	1
14:51116863:C:T	rs2356457	14	51116863	T	C	0.4898	0.0317438	0.358034	0.166254	0.1515	rs12896268	19	SAV1	0	intronic	8.564	5	2	5	1	1	1
4:116211196:C:T	rs7683038	4	116211196	T	C	0.2145	0.0318412	-0.417733	0.194086	0.583373	rs59230330	8	MRPS33P3	146736	intergenic	4.033	7	1	15	0	0	1
14:51108877:C:T	rs3015500	14	51108877	T	C	0.4874	0.0318897	0.357703	0.166243	0.155137	rs12896268	19	SAV1	0	intronic	8.681	NA	4	5	1	1	1
10:133000458:C:T	rs2944479	10	133000458	C	T	0.0637	0.0319238	0.651195	0.302704	0.16354	rs2918132	14	TCERG1L	0	intronic	1.062	5	5	15	1	0	1
7:9539394:T:TTGG	rs112246666	7	9539394	TTGG	T	0.08027	0.0320636	-0.579764	0.269721	0.113255	rs77755643	10	AC079756.1	94852	intergenic	0.663	NA	9	15	0	0	1
7:9535175:C:G	rs2350851	7	9535175	C	G	0.07528	0.0320813	-0.576623	0.268287	0.124843	rs77755643	10	AC079756.1	99071	intergenic	0.596	6	9	15	0	0	1
6:110799548:A:G	rs3806970	6	110799548	G	A	0.1334	0.0323043	-0.593735	0.276608	0.136866	rs221720	9	CTA-331P3.1	0	ncRNA_exonic	3.315	NA	4	14	1	1	1
4:14200946:C:T	rs75578577	4	14200946	T	C	0.1134	0.0323696	0.786518	0.36656	0.240135	rs1968315	6	RP11-669M16.1	0	ncRNA_intronic	0.564	6	9	15	1	1	1
4:14198116:A:T	rs12512964	4	14198116	T	A	0.128	0.0326836	0.784558	0.366312	0.199312	rs1968315	6	RP11-669M16.1	0	ncRNA_intronic	2.49	2b	9	15	1	0	1
6:110808217:C:G	rs72941991	6	110808217	G	C	0.1424	0.0328363	-0.595341	0.278211	0.125948	rs221720	9	CTA-331P3.1	7577	intergenic	1.905	6	5	15	1	1	0
6:110808437:A:T	rs72941993	6	110808437	T	A	0.1424	0.0328363	-0.595341	0.278211	0.125948	rs221720	9	CTA-331P3.1	7797	intergenic	3.669	7	5	15	1	1	0
6:110809156:A:G	rs72941995	6	110809156	A	G	0.1428	0.0328363	-0.595341	0.278211	0.125385	rs221720	9	CTA-331P3.1	8516	intergenic	5.492	7	5	15	1	1	0
6:110809470:A:G	rs72941997	6	110809470	G	A	0.1428	0.0328363	-0.595341	0.278211	0.125385	rs221720	9	CTA-331P3.1	8830	intergenic	3.337	3a	5	15	1	1	0
14:51122269:A:G	rs4636807	14	51122269	A	G	0.4844	0.0329514	0.355201	0.1661	0.155921	rs12896268	19	SAV1	0	intronic	2.586	7	5	5	1	1	1
14:51122205:C:G	rs4643225	14	51122205	C	G	0.4844	0.0329527	0.355202	0.166101	0.155921	rs12896268	19	SAV1	0	intronic	0.162	6	5	5	1	1	1
14:51129534:A:G	rs8016337	14	51129534	G	A	0.4788	0.0330136	0.35757	0.167267	0.13447	rs12896268	19	SAV1:RP11-248J18.2	00:00:00	ncRNA_exonic	6.207	6	1	5	1	1	1
14:51118327:A:C	rs2934689	14	51118327	C	A	0.4844	0.0330273	0.355003	0.16608	0.155228	rs12896268	19	SAV1	0	intronic	8.097	7	4	5	1	1	1
6:110809650:G:T	rs72941999	6	110809650	G	T	0.143	0.0331092	-0.594261	0.278141	0.126347	rs221720	9	CTA-331P3.1	9010	intergenic	8.944	5	5	15	1	1	0
7:9538003:A:G	rs17161702	7	9538003	G	A	0.07488	0.033486	-0.572956	0.268746	0.125628	rs77755643	10	AC079756.1	96243	intergenic	4.582	5	15	15	0	0	1
7:9539548:A:G	rs6949960	7	9539548	A	G	0.07788	0.0335396	-0.573223	0.268953	0.118648	rs77755643	10	AC079756.1	94698	intergenic	0.671	6	9	15	0	0	1
7:9539416:C:G	rs6968065	7	9539416	C	G	0.07827	0.0335836	-0.573053	0.26894	0.117928	rs77755643	10	AC079756.1	94830	intergenic	0.031	6	9	15	0	0	1
14:51129996:C:T	rs10873037	14	51129996	C	T	0.4637	0.0335914	0.35623	0.16719	0.152715	rs12896268	19	SAV1	0	intronic	4.473	7	1	5	1	1	1
19:13686289:C:G	rs11667468	19	13686289	G	C	0.3448	0.0336429	-0.355524	0.166907	0.426123	rs7252743	21	CACNA1A	0	intronic	1.93	5	5	15	1	0	1
14:51138560:A:C	rs4580077	14	51138560	A	C	0.4878	0.0337232	0.355134	0.1668	0.160967	rs12896268	19	SAV1	3510	intergenic	1.319	5	5	15	1	1	1
14:50870199:A:G	rs60636573	14	50870199	A	G	0.346	0.0339976	0.36248	0.170513	0.318264	rs12896268	19	CDKL1	0	intergenic	0.805	4	5	15	1	1	1
14:50869373:C:T	rs7148152	14	50869373	T	C	0.3464	0.0343762	0.361634	0.170477	0.315132	rs12896268	19	CDKL1	0	intergenic	0.493	6	5	15	1	1	1
4:115972330:A:C	rs518195	4	115972330	C	A	0.2724	0.0345695	-0.52361	0.247099	0.271952	rs59230330	8	NDST4	0	intronic	0.559	NA	15	15	1	0	1
4:115972235:A:T	rs523325	4	115972235	T	A	0.2724	0.0345787	-0.523581	0.247098	0.271952	rs59230330	8	NDST4	0	intronic	4.706	7	15	15	1	0	1
4:14195599:C:T	rs77697280	4	14195599	C	T	0.03834	0.0346081	0.7974	0.376385	0.104556	rs1968315	6	RP11-669M16.1	0	ncRNA_intronic	1.598	5	9	15	1	0	1
4:14214698:A:G	rs79182415	4	14214698	G	A	0.1114	0.0347676	0.782035	0.369459	0.240179	rs1968315	6	RP11-669M16.1	0	ncRNA_intronic	0.635	7	9	15	1	0	1
17:10067198:C:T	rs80147791	17	10067198	T	C	0.01138	0.034923	-0.981622	0.464149	0.13714	rs12935988	20	GAS7	0	intronic	14.43	5	5	15	1	0	1
7:9538367:A:C	rs73052435	7	9538367	A	C	0.07149	0.0350094	-0.568489	0.268932	0.135699	rs77755643	10	AC079756.1	95879	intergenic	1.577	7	15	15	0	0	1
14:51121700:A:G	rs10133849	14	51121700	G	A	0.4906	0.0350288	0.351041	0.166083	0.166555	rs12896268	19	SAV1	0	intronic	2.541	7	4	5	1	1	1
6:110799073:G:T	rs72939948	6	110799073	G	T	0.1358	0.0353027	-0.582855	0.276172	0.147175	rs221720	9	CTA-331P3.1	36	upstream	2.592	7	5	14	1	1	1
4:67125537:A:T	rs35759973	4	67125537	T	A	0.2608	0.0353052	-0.496939	0.235466	0.149054	rs67668930	7	MIR1269A	17004	intergenic	7.377	6	9	15	1	0	1
4:67125692:A:G	rs34390495	4	67125692	G	A	0.2616	0.0353328	-0.496854	0.235461	0.148313	rs67668930	7	MIR1269A	16849	intergenic	2.951	6	9	15	1	0	1
6:110812380:A:ATTTC	rs77447790	6	110812380	ATTTC	A	0.1368	0.035413	-0.592654	0.280985	0.135451	rs221720	9	CTA-331P3.1	11740	intergenic	2.667	NA	5	15	1	1	0
7:9536091:G:T	rs56721271	7	9536091	T	G	0.07248	0.0355771	-0.567074	0.269098	0.133501	rs77755643	10	AC079756.1	98155	intergenic	1.912	6	7	15	0	0	1
8:69895506:A:G	rs4737933	8	69895506	A	G	0.4718	0.0355822	-0.353441	0.167726	0.125194	rs2912504	13	RP11-600K15.1	0	ncRNA_intronic	3.25	6	5	15	1	0	1
19:13691951:A:C	rs7251849	19	13691951	A	C	0.2079	0.0356417	-0.800958	0.380219	0.1301	rs7252743	21	CACNA1A	0	intronic	1.387	7	5	15	1	0	1
14:51124527:C:T	rs11621971	14	51124527	C	T	0.4868	0.0356736	0.350338	0.166336	0.162719	rs12896268	19	SAV1	0	intronic	4.048	3a	1	5	1	1	1
6:110812349:A:G	rs72944010	6	110812349	G	A	0.1368	0.0356978	-0.591608	0.280925	0.135451	rs221720	9	CTA-331P3.1	11709	intergenic	1.452	7	5	15	1	1	0
12:78409662:A:G	rs2369944	12	78409662	A	G	0.3972	0.0363113	0.342454	0.163155	0.122749	rs5799370	17	NAV3	0	intronic	0.148	NA	5	15	1	0	1
7:9539279:C:T	rs9918508	7	9539279	C	T	0.07149	0.0364	-0.565256	0.269433	0.135699	rs77755643	10	AC079756.1	94967	intergenic	1.542	7	9	15	0	0	1
14:51136330:G:T	rs12881776	14	51136330	G	T	0.4854	0.0364959	0.349425	0.166641	0.165558	rs12896268	19	SAV1	1280	intergenic	0.051	4	1	15	1	1	1
7:9539181:A:G	rs9918608	7	9539181	G	A	0.07149	0.0364975	-0.565377	0.269631	0.135699	rs77755643	10	AC079756.1	95065	intergenic	1.521	7	9	15	0	0	1
7:9538428:C:T	rs17802410	7	9538428	C	T	0.07129	0.0365396	-0.56524	0.269626	0.136145	rs77755643	10	AC079756.1	95818	intergenic	0.698	6	9	15	0	0	1
14:51137355:C:T	rs7150204	14	51137355	C	T	0.4886	0.0366716	0.349205	0.166693	0.161759	rs12896268	19	SAV1	2305	intergenic	3.818	3a	1	15	1	1	1
7:9532034:G:T	rs73050307	7	9532034	T	G	0.07089	0.0368549	-0.565967	0.270428	0.133371	rs77755643	10	AC079756.1	102212	intergenic	6.852	7	8	15	0	0	1
4:14259503:A:G	rs2052711	4	14259503	G	A	0.2883	0.0368618	0.356339	0.170271	0.368597	rs1968315	6	RP11-669M16.1	15065	intergenic	1.934	6	5	15	1	0	1
4:14221252:A:C	rs17348460	4	14221252	C	A	0.04333	0.0368628	0.64201	0.306776	0.108335	rs1968315	6	RP11-669M16.1	0	ncRNA_intronic	2.415	5	5	15	1	0	1
10:133012146:A:G	rs10765056	10	133012146	G	A	0.3812	0.03691	0.346126	0.165433	0.110495	rs2918132	14	TCERG1L	0	intronic	2.104	3a	7	15	1	0	1
3:14380985:C:T	rs12638446	3	14380985	T	C	0.3089	0.0370189	-0.352435	0.168546	0.388213	rs13091718	5	RP11-536I6.1	8965	intergenic	1.537	7	5	15	1	0	1
2:119085908:G:T	rs7562732	2	119085908	T	G	0.1601	0.0370873	-0.64112	0.306717	0.12462	rs2422177	4	AC093901.1	141945	intergenic	5.182	7	13	15	0	0	1
14:51144800:A:T	rs6572682	14	51144800	A	T	0.4858	0.0371127	0.348991	0.166983	0.163036	rs12896268	19	SAV1	9750	intergenic	6.306	1d	1	15	1	1	1
3:14348080:C:T	rs6442440	3	14348080	T	C	0.3602	0.0371285	-0.379059	0.181384	0.104467	rs13091718	5	RP11-536I6.2	2734	intergenic	2.586	7	5	14	1	0	1
12:78408770:A:G	rs1479010	12	78408770	G	A	0.4129	0.0371417	0.337902	0.161701	0.100437	rs5799370	17	NAV3	0	intronic	5.822	NA	4	15	1	0	1
14:50868902:A:G	rs73277702	14	50868902	A	G	0.3464	0.0382442	0.354816	0.170781	0.315132	rs12896268	19	CDKL1	0	intergenic	4.018	7	5	15	1	0	1
14:50870938:C:T	rs60552243	14	50870938	T	C	0.3311	0.0382617	0.354744	0.170762	0.335007	rs12896268	19	CDKL1	0	intergenic	3.314	5	5	15	1	1	1
14:51112360:A:G	rs2934688	14	51112360	A	G	0.4952	0.0382684	0.346184	0.166647	0.156868	rs12896268	19	SAV1	0	intronic	2.587	7	5	5	1	1	1
14:51112421:C:CCT	rs67822283	14	51112421	C	CCT	0.4952	0.0382731	0.346175	0.166647	0.157214	rs12896268	19	SAV1	0	intronic	10.21	NA	5	5	1	1	1
14:51112824:C:T	rs3015498	14	51112824	C	T	0.4918	0.0385036	0.344554	0.166065	0.162459	rs12896268	19	SAV1	0	intronic	1.462	NA	5	5	1	1	1
12:78408961:T:TG	rs143240713	12	78408961	T	TG	0.396	0.038892	0.338588	0.163517	0.121466	rs5799370	17	NAV3	0	intronic	5.697	NA	4	15	1	0	1
23:80917313:G:T	rs150753295	23	80917313	T	G	0.02736	0.0389391	0.749607	0.362101	0.248153	rs73241354	22	XXyac-YR12DB5.1	60507	intergenic	2.088	6	9	15	0	0	1
1:173178453:A:G	rs10489266	1	173178453	A	G	0.06609	0.0392373	-0.624069	0.301921	0.260735	rs72724954	3	TNFSF4	2000	intergenic	5.794	NA	5	15	1	0	1
2:119090434:A:G	rs6542449	2	119090434	A	G	0.3622	0.0395722	-0.418284	0.202709	0.142759	rs2422177	4	AC093901.1	146471	intergenic	0.888	7	5	15	0	0	1
4:67127304:A:G	rs7698421	4	67127304	G	A	0.3119	0.0396869	-0.494348	0.239711	0.11644	rs67668930	7	MIR1269A	15237	intergenic	2.49	5	9	15	1	0	1
7:9535665:A:G	rs73050314	7	9535665	A	G	0.07208	0.039729	-0.545846	0.264739	0.134373	rs77755643	10	AC079756.1	98581	intergenic	5.77	7	7	15	0	0	1
7:9535405:C:G	rs4416744	7	9535405	C	G	0.07208	0.0400788	-0.545006	0.264799	0.133603	rs77755643	10	AC079756.1	98841	intergenic	2.652	NA	9	15	0	0	1
6:110817797:A:C	rs9481081	6	110817797	C	A	0.1362	0.0402137	-0.56946	0.276869	0.12083	rs221720	9	CTA-331P3.1	17157	intergenic	1.066	5	5	15	1	1	0
19:13697639:C:T	rs10423209	19	13697639	C	T	0.4469	0.0402874	-0.402069	0.195556	0.266698	rs7252743	21	CACNA1A	0	intronic	8.1	5	5	15	1	0	1
2:119078123:A:T	rs73947787	2	119078123	A	T	0.3604	0.0405232	-0.416196	0.202667	0.14123	rs2422177	4	AC093901.1	134160	intergenic	0.856	5	2	14	0	0	1
4:14162797:A:T	rs75619157	4	14162797	A	T	0.03095	0.0405557	0.771116	0.375557	0.133628	rs1968315	6	RP11-669M16.1	3281	intergenic	3.417	7	5	15	1	0	1
23:81927394:T:TA	rs55831024	23	81927394	T	TA	0.2923	0.0406739	-0.299859	0.146127	0.185407	rs73241354	22	SNORA4	110597	intergenic	0.881	NA	9	15	0	0	1
3:14345247:A:G	rs1384109	3	14345247	G	A	0.1869	0.0407823	0.406748	0.198323	0.143529	rs13091718	5	RP11-536I6.2	0	ncRNA_exonic	0.027	NA	5	14	1	0	1
14:50870834:A:G	rs34074509	14	50870834	A	G	0.3371	0.0408969	0.354626	0.173008	0.299644	rs12896268	19	CDKL1	0	intergenic	3.69	7	5	15	1	1	1
8:69898216:C:T	rs4276698	8	69898216	T	C	0.1827	0.0409229	-0.440711	0.215033	0.364642	rs2912504	13	RP11-600K15.1	0	ncRNA_intronic	1.529	7	5	15	1	0	1
23:81413439:A:C	rs581139	23	81413439	A	C	0.4838	0.0409284	-0.287752	0.140405	0.111574	rs73241354	22	RNU6-974P	156662	intergenic	1.044	6	9	15	0	1	1
14:50870732:C:T	rs35707428	14	50870732	C	T	0.3371	0.0409328	0.354488	0.172972	0.299644	rs12896268	19	CDKL1	0	intergenic	1.913	7	5	15	1	1	1
7:9537597:C:T	rs9918558	7	9537597	T	C	0.07109	0.0414973	-0.542371	0.265389	0.13293	rs77755643	10	AC079756.1	96649	intergenic	9.092	6	15	15	0	0	1
2:119229863:C:T	rs2043743	2	119229863	C	T	0.07568	0.0417809	-1.64026	0.80372	0.108306	rs2422177	4	AC093901.1	285900	intergenic	0.192	NA	5	15	0	0	1
4:116204307:G:T	rs79411594	4	116204307	G	T	0.2145	0.0418182	-0.393731	0.192962	0.581354	rs59230330	8	MRPS33P3	139847	intergenic	0.73	7	5	15	0	0	1
12:78407718:A:T	rs1382634	12	78407718	T	A	0.3956	0.0419437	0.334856	0.164209	0.117267	rs5799370	17	NAV3	0	intronic	6.518	7	5	15	1	0	1
23:81382605:C:T	rs142608108	23	81382605	C	T	0.03035	0.0423576	0.725303	0.356399	0.276621	rs73241354	22	RNU6-974P	125828	intergenic	0.73	5	9	15	0	0	1
1:173249164:C:T	rs72724944	1	173249164	C	T	0.01697	0.0423808	-0.767145	0.377002	0.205738	rs72724954	3	snoU13	1051	intergenic	3.605	6	7	15	1	0	1
1:54607546:A:T	rs4927061	1	54607546	T	A	0.4507	0.0424226	0.337806	0.166044	0.111397	rs954878	1	CDCP2:RP11-446E24.4	00:00:00	intronic	1.978	5	5	15	1	0	1
10:133010484:A:G	rs4750857	10	133010484	G	A	0.3726	0.0424594	0.339077	0.166698	0.117063	rs2918132	14	TCERG1L	0	intronic	0.267	7	5	15	1	0	1
23:81645499:A:G	rs146231486	23	81645499	A	G	0.02975	0.0425052	0.723978	0.356003	0.266459	rs73241354	22	RP4-581F12.1	107618	intergenic	4.681	5	9	15	0	0	1
4:116187674:A:G	rs13119060	4	116187674	A	G	0.4267	0.0425267	0.345883	0.1701	0.132782	rs59230330	8	MRPS33P3	123214	intergenic	1.84	7	9	15	0	0	1
23:81428595:A:G	rs147166358	23	81428595	G	A	0.02995	0.0425887	0.724178	0.356246	0.279911	rs73241354	22	RNU6-974P	171818	intergenic	0.791	6	9	15	0	0	1
7:108027226:A:G	rs10235291	7	108027226	A	G	0.1088	0.0426885	-0.720709	0.354711	0.164128	rs141901173	11	NRCAM	0	intronic	4.438	6	5	15	1	1	1
23:81395577:C:T	rs185193237	23	81395577	C	T	0.03015	0.0430292	0.72251	0.356182	0.278259	rs73241354	22	RNU6-974P	138800	intergenic	4.231	6	9	15	0	0	1
1:173192648:G:GA	rs200424407	1	173192648	GA	G	0.01757	0.0437103	-0.756839	0.374326	0.191658	rs72724954	3	TNFSF4	16195	intergenic	2.035	NA	5	15	1	0	1
14:50872341:G:T	rs57828515	14	50872341	G	T	0.1316	0.0437653	0.555009	0.274575	0.11121	rs12896268	19	CDKL1	0	intergenic	4.562	5	5	15	1	1	1
10:133007572:C:T	rs4750856	10	133007572	C	T	0.3936	0.0438419	0.334639	0.165613	0.165923	rs2918132	14	TCERG1L	0	intronic	2.471	7	5	15	1	0	1
4:14238720:A:G	rs28497738	4	14238720	A	G	0.2438	0.0448566	0.494984	0.246146	0.180306	rs1968315	6	RP11-669M16.1	0	ncRNA_intronic	3.695	7	5	15	1	0	1
4:116516299:A:G	rs4386673	4	116516299	G	A	0.2338	0.0448762	-0.373103	0.185554	0.209268	rs59230330	8	RPF2P2	33668	intergenic	0.032	7	5	15	1	0	1
4:14230677:A:G	rs6836732	4	14230677	A	G	0.244	0.0448938	0.494788	0.246091	0.176891	rs1968315	6	RP11-669M16.1	0	ncRNA_intronic	4.358	6	5	15	1	0	1
14:51142605:A:G	rs7147956	14	51142605	A	G	0.4677	0.0450907	0.336286	0.167412	0.153535	rs12896268	19	SAV1	7555	intergenic	4.514	2b	2	15	1	1	1
4:116321325:A:AT	rs77708352	4	116321325	AT	A	0.2109	0.0453657	-0.389653	0.194228	0.535644	rs59230330	8	RPF2P2	228642	intergenic	2.653	NA	9	15	0	0	1
4:67239666:C:T	rs60275503	4	67239666	C	T	0.1136	0.0456666	-1.17893	0.588479	0.135149	rs67668930	7	RPS23P3	57143	intergenic	0.513	7	9	15	0	0	1
1:173183951:G:T	rs11589373	1	173183951	T	G	0.119	0.0459541	-0.494456	0.247142	0.151989	rs72724954	3	TNFSF4	7498	intergenic	1.945	6	5	15	1	1	1
4:14195044:C:T	rs16889812	4	14195044	T	C	0.1076	0.0461204	0.74426	0.372287	0.231937	rs1968315	6	RP11-669M16.1	0	ncRNA_intronic	1.937	6	9	15	1	0	1
1:160323674:G:GA	rs77004914	1	160323674	G	GA	0.1108	0.0461394	-0.469367	0.234803	0.503554	rs77847479	2	NCSTN	0	intronic	9.517	NA	4	4	1	0	1
14:51153811:C:T	rs10140458	14	51153811	C	T	0.4826	0.0469093	-0.32948	0.165406	0.172046	rs12896268	19	ZFP64P1	17249	intergenic	4.116	7	5	15	1	1	1
14:50869117:A:T	rs7401075	14	50869117	A	T	0.1296	0.0471587	0.500799	0.251698	0.135834	rs12896268	19	CDKL1	0	intergenic	0.058	6	5	15	1	1	1
19:13692041:A:G	rs7252459	19	13692041	G	A	0.1971	0.0473293	-0.75574	0.380124	0.154853	rs7252743	21	CACNA1A	0	intronic	0.794	7	5	15	1	0	1
4:14182142:C:G	rs16889780	4	14182142	G	C	0.1072	0.0473439	0.738125	0.371289	0.222424	rs1968315	6	RP11-669M16.1	0	ncRNA_intronic	1.325	3a	5	15	1	1	1
4:14201352:A:G	rs76406012	4	14201352	A	G	0.1076	0.0477924	0.745178	0.375597	0.231937	rs1968315	6	RP11-669M16.1	0	ncRNA_intronic	5.758	7	9	15	1	0	1
4:14198034:A:AT	rs76013721	4	14198034	A	AT	0.1078	0.0482275	0.743062	0.375264	0.231232	rs1968315	6	RP11-669M16.1	0	ncRNA_intronic	0.568	NA	9	15	1	0	1
10:133000483:A:C	rs2918131	10	133000483	C	A	0.09065	0.0482903	0.581371	0.293688	0.251394	rs2918132	14	TCERG1L	0	intronic	2.188	NA	5	15	1	0	1
14:50869324:C:T	rs7146699	14	50869324	C	T	0.1262	0.0485201	0.498447	0.252057	0.134479	rs12896268	19	CDKL1	0	intergenic	0.384	NA	5	15	1	1	1
3:14347583:C:T	rs56014512	3	14347583	C	T	0.1953	0.0487033	0.391158	0.197964	0.15854	rs13091718	5	RP11-536I6.2	2237	intergenic	0.189	4	5	14	1	0	1
3:14347821:G:T	rs4685118	3	14347821	G	T	0.1951	0.0496843	0.38924	0.197851	0.158508	rs13091718	5	RP11-536I6.2	2475	intergenic	3.136	5	5	14	1	0	1
23:81347897:C:T	rs144978567	23	81347897	C	T	0.02935	0.0498113	0.705989	0.359055	0.276826	rs73241354	22	RNU6-974P	91120	intergenic	0.079	5	7	15	0	0	1
1:54464113:T:TA	rs60736292	1	54464113	T	TA	0.3862	NA	NA	NA	0.263874	rs954878	1	LDLRAD1	10298	intergenic	2.856	NA	9	15	1	0	1
1:54465300:A:AAAAAGAAAAG	rs141137554	1	54465300	A	AAAAAGAAAAG	0.3696	NA	NA	NA	0.326419	rs954878	1	LDLRAD1	9111	intergenic	0.522	NA	14	15	1	0	1
1:54465633:C:CA	rs61710046	1	54465633	CA	C	0.3956	NA	NA	NA	0.28691	rs954878	1	LDLRAD1	8778	intergenic	1.391	NA	7	15	1	0	1
1:54471096:G:GT	rs57875177	1	54471096	G	GT	0.385	NA	NA	NA	0.310071	rs954878	1	LDLRAD1	3315	intergenic	0.753	NA	7	15	1	0	1
1:54479107:C:CTGCCCCCAACTTGCCCCCAACTTGCCCCCAACT	rs113415893	1	54479107	CTGCCCCCAACTTGCCCCCAACTTGCCCCCAACT	C	0.4798	NA	NA	NA	0.100328	rs954878	1	LDLRAD1	0	intronic	NA	NA	2	15	1	0	1
1:54488532:C:CAAA	rs201616846	1	54488532	CAAA	C	0.3131	NA	NA	NA	0.168787	rs954878	1	RP4-758J24.5	3823	intergenic	2.253	NA	5	15	1	0	1
1:54493443:C:CA	rs113234374	1	54493443	C	CA	0.1524	NA	NA	NA	0.100846	rs954878	1	RP4-758J24.5	0	ncRNA_exonic	1.472	NA	4	15	1	0	1
1:54501288:T:TTTTTTC	rs147777455	1	54501288	T	TTTTTTC	0.1462	NA	NA	NA	0.112047	rs954878	1	TMEM59	0	intronic	0.286	NA	4	4	1	0	1
1:54519107:A:G	1:54519107:A:G	1	54519107	G	A	0.123	NA	NA	NA	0.240249	rs954878	1	TMEM59	0	NA	6.584	2a	1	1	1	1	1
1:54519107:C:G	1:54519107:C:G	1	54519107	G	C	0.119	NA	NA	NA	0.240249	rs954878	1	TMEM59	0	UTR5	5.735	NA	1	1	1	0	1
1:54530365:C:CT	rs398049293	1	54530365	CT	C	0.1705	NA	NA	NA	0.110704	rs954878	1	TCEANC2	0	intronic	2.256	NA	4	5	1	0	1
1:54549693:G:GT	rs34774545	1	54549693	GT	G	0.3468	NA	NA	NA	0.480849	rs954878	1	TCEANC2	0	intronic	1.599	NA	5	5	1	0	1
1:54556823:C:CA	rs571717124	1	54556823	C	CA	0.2875	NA	NA	NA	0.439487	rs954878	1	TCEANC2	0	intronic	7.27	NA	4	5	1	0	1
1:54559406:C:CT	rs34379281	1	54559406	CT	C	0.4375	NA	NA	NA	0.314359	rs954878	1	TCEANC2	0	intronic	5.126	NA	4	5	1	0	1
1:54585516:A:ACCAC	rs112272151	1	54585516	A	ACCAC	0.4048	NA	NA	NA	0.104339	rs954878	1	TCEANC2	7323	intergenic	6.891	NA	1	15	1	0	1
1:54585521:G:T	rs111369383	1	54585521	T	G	0.4048	NA	NA	NA	0.104339	rs954878	1	TCEANC2	7328	intergenic	7.658	NA	1	15	1	0	1
1:54585574:A:G	rs72664149	1	54585574	A	G	0.4069	NA	NA	NA	0.401436	rs954878	1	TCEANC2	7381	intergenic	12.61	3a	1	15	1	0	1
1:54585645:C:CCA	rs141355636	1	54585645	CCA	C	0.4105	NA	NA	NA	0.406602	rs954878	1	TCEANC2	7452	intergenic	6.817	NA	1	15	1	0	1
1:54588727:C:CCACCCAGCCTTTGGCCTGG	rs67430669	1	54588727	CCACCCAGCCTTTGGCCTGG	C	0.477	NA	NA	NA	0.196102	rs954878	1	CDCP2	10019	intergenic	9.199	NA	5	15	1	0	1
1:54592446:C:T	rs596226	1	54592446	T	C	0.4984	NA	NA	NA	0.240826	rs954878	1	CDCP2	6300	intergenic	1.787	6	5	15	1	0	1
1:54592667:A:ACC	rs77271075	1	54592667	ACC	A	0.491	NA	NA	NA	0.250185	rs954878	1	CDCP2	6079	intergenic	2.743	NA	5	15	1	0	1
1:54593297:A:AAAT	rs5774175	1	54593297	AAAT	A	0.4892	NA	NA	NA	0.244652	rs954878	1	CDCP2	5449	intergenic	10.12	NA	5	15	1	0	1
1:54600418:T:TTG	rs58381161	1	54600418	TTG	T	0.4555	NA	NA	NA	0.138949	rs954878	1	CDCP2	0	intergenic	0.822	NA	5	15	1	0	1
1:54605319:G:GC	1:54605319:G:GC	1	54605319	G	GC	0.4798	NA	NA	NA	0.131871	rs954878	1	CDCP2	0	exonic	23	NA	5	15	1	0	1
1:160343171:T:TA	rs562356455	1	160343171	T	TA	0.2037	NA	NA	NA	0.225133	rs77847479	2	NHLH1	532	downstream	1.509	NA	5	15	1	0	1
1:160360489:A:G	rs115483397	1	160360489	G	A	0.01238	NA	NA	NA	0.136124	rs77847479	2	RNU4-42P	2068	intergenic	1.778	7	9	15	1	0	1
1:173219602:G:GT	rs370313737	1	173219602	G	GT	0.07348	NA	NA	NA	0.465696	rs72724954	3	snoU13	30613	intergenic	1.307	NA	5	15	1	0	1
1:173261791:G:GA	rs374793795	1	173261791	G	GA	0.08347	NA	NA	NA	0.576412	rs72724954	3	snoU13	11481	intergenic	1.704	NA	5	15	1	0	1
1:173269238:G:GTAGATAGATAGA	rs72030114	1	173269238	G	GTAGATAGATAGA	0.09904	NA	NA	NA	0.438712	rs72724954	3	snoU13	18928	intergenic	4.69	NA	5	15	1	0	1
1:173271890:C:CT	rs5778755	1	173271890	C	CT	0.1336	NA	NA	NA	0.446402	rs72724954	3	snoU13	21580	intergenic	3.928	NA	2	15	1	0	1
2:118069767:T:TA	rs35689506	2	118069767	T	TA	0.271	NA	NA	NA	0.102881	rs2422177	4	AC092170.1	130628	intergenic	1.292	NA	5	15	0	0	1
2:118108896:T:TA	rs139680597	2	118108896	T	TA	0.2762	NA	NA	NA	0.112178	rs2422177	4	AC092170.1	169757	intergenic	1.143	NA	5	15	0	0	1
2:118283634:A:G	rs10204204	2	118283634	G	A	0.04812	NA	NA	NA	0.104235	rs2422177	4	AC009312.1	231504	intergenic	0.372	7	15	15	0	0	1
2:118381407:C:G	rs189619337	2	118381407	C	G	0.1282	NA	NA	NA	0.117388	rs2422177	4	AC009312.1	133731	intergenic	0.542	5	1	15	0	0	1
2:118381500:C:G	rs535846215	2	118381500	G	C	0.1166	NA	NA	NA	0.113294	rs2422177	4	AC009312.1	133638	intergenic	0.259	NA	1	15	0	0	1
2:118381518:A:G	rs371911610	2	118381518	G	A	0.1188	NA	NA	NA	0.110123	rs2422177	4	AC009312.1	133620	intergenic	0.447	6	1	15	0	0	1
2:118400222:A:C	2:118400222:A:C	2	118400222	A	C	0.2129	NA	NA	NA	0.10364	rs2422177	4	AC009312.1	114916	intergenic	0.654	6	9	15	0	0	1
2:118400222:C:T	2:118400222:C:T	2	118400222	C	T	0.07907	NA	NA	NA	0.10364	rs2422177	4	AC009312.1	114916	NA	0.479	NA	9	15	0	0	1
2:118500756:A:G	rs17047352	2	118500756	A	G	0.03355	NA	NA	NA	0.10203	rs2422177	4	AC009312.1	14382	intergenic	2.705	5	5	15	1	0	1
2:118518228:A:T	rs116792728	2	118518228	T	A	0.01877	NA	NA	NA	0.100351	rs2422177	4	AC009312.1	0	ncRNA_intronic	10.44	7	9	15	1	0	1
2:118522133:G:T	rs79515405	2	118522133	T	G	0.01877	NA	NA	NA	0.100351	rs2422177	4	AC009312.1	0	ncRNA_intronic	1.968	5	14	15	1	0	1
2:118591100:A:G	rs17047473	2	118591100	A	G	0.01877	NA	NA	NA	0.104672	rs2422177	4	AC009404.2	412	upstream	5.681	4	4	4	1	0	1
2:118597356:C:T	rs115330062	2	118597356	C	T	0.01877	NA	NA	NA	0.104672	rs2422177	4	AC009404.2	0	ncRNA_exonic	1.635	7	4	15	1	0	1
2:118600327:A:G	rs79084119	2	118600327	G	A	0.01877	NA	NA	NA	0.104672	rs2422177	4	AC009404.2	1092	intergenic	0.792	7	5	15	1	0	1
2:118603766:C:T	rs76590050	2	118603766	C	T	0.01917	NA	NA	NA	0.105568	rs2422177	4	AC009404.2	4531	intergenic	0.583	7	5	14	1	0	1
2:118612001:C:G	rs74378712	2	118612001	C	G	0.01977	NA	NA	NA	0.107096	rs2422177	4	HTR5BP	5001	intergenic	8.403	6	5	14	1	0	1
2:118616319:A:G	rs6542402	2	118616319	G	A	0.01997	NA	NA	NA	0.105431	rs2422177	4	HTR5BP	683	upstream	0.743	5	1	14	1	0	1
2:118620282:A:G	rs6727298	2	118620282	G	A	0.01977	NA	NA	NA	0.107096	rs2422177	4	HTR5BP	0	ncRNA_intronic	6.62	5	5	14	1	0	1
2:118622187:A:G	rs74997909	2	118622187	A	G	0.01977	NA	NA	NA	0.107096	rs2422177	4	HTR5BP	0	ncRNA_intronic	3	6	14	15	1	0	1
2:118625529:A:G	rs115972252	2	118625529	A	G	0.01977	NA	NA	NA	0.107096	rs2422177	4	HTR5BP	0	ncRNA_intronic	2.767	7	9	15	1	0	1
2:118625811:C:G	rs6726670	2	118625811	G	C	0.01977	NA	NA	NA	0.107096	rs2422177	4	HTR5BP	0	ncRNA_intronic	2.265	6	9	15	1	0	1
2:118631827:C:T	rs189376141	2	118631827	C	T	0.01977	NA	NA	NA	0.107096	rs2422177	4	HTR5BP	0	ncRNA_intronic	0.749	6	14	15	1	0	1
2:118632519:A:G	rs541013129	2	118632519	A	G	0.01977	NA	NA	NA	0.107096	rs2422177	4	HTR5BP	0	ncRNA_intronic	0.704	NA	14	15	1	0	1
2:118632553:C:G	rs544876023	2	118632553	G	C	0.01977	NA	NA	NA	0.107096	rs2422177	4	HTR5BP	0	ncRNA_intronic	0.279	NA	14	15	1	0	1
2:118633208:A:G	rs6721041	2	118633208	A	G	0.01977	NA	NA	NA	0.107096	rs2422177	4	HTR5BP	0	ncRNA_intronic	0.83	6	7	15	1	0	1
2:118635278:G:T	rs6735121	2	118635278	T	G	0.01957	NA	NA	NA	0.104319	rs2422177	4	HTR5BP	0	ncRNA_intronic	1.443	6	9	15	1	0	1
2:118647858:C:T	rs75294727	2	118647858	C	T	0.01957	NA	NA	NA	0.108646	rs2422177	4	HTR5BP	0	ncRNA_intronic	1.498	6	7	15	1	0	1
2:118649597:A:G	rs79082669	2	118649597	A	G	0.01937	NA	NA	NA	0.108199	rs2422177	4	HTR5BP	0	ncRNA_intronic	9.906	6	9	15	1	0	1
2:118652672:C:T	rs145682470	2	118652672	C	T	0.01937	NA	NA	NA	0.108199	rs2422177	4	HTR5BP	0	ncRNA_intronic	0.492	6	9	15	1	0	1
2:118654246:C:T	rs76271045	2	118654246	T	C	0.01937	NA	NA	NA	0.108199	rs2422177	4	HTR5BP	0	ncRNA_intronic	1.579	6	9	15	1	0	1
2:118659496:A:T	rs150352895	2	118659496	A	T	0.01957	NA	NA	NA	0.106472	rs2422177	4	HTR5BP	0	ncRNA_intronic	3.915	6	9	15	1	0	1
2:118688329:C:T	rs13387061	2	118688329	C	T	0.04673	NA	NA	NA	0.102574	rs2422177	4	HTR5BP:CCDC93	00:00:00	ncRNA_exonic	0.815	7	4	4	1	0	1
2:118707615:C:T	rs17047567	2	118707615	T	C	0.04673	NA	NA	NA	0.102574	rs2422177	4	CCDC93	0	intronic	3.605	5	4	4	1	0	1
2:118764803:A:G	rs60777166	2	118764803	A	G	0.04054	NA	NA	NA	0.101752	rs2422177	4	CCDC93:AC009303.1	00:00:00	ncRNA_intronic	9.698	7	4	4	1	0	1
2:118766292:G:T	rs7596280	2	118766292	G	T	0.04673	NA	NA	NA	0.102574	rs2422177	4	CCDC93:AC009303.1	00:00:00	ncRNA_exonic	4.819	5	4	4	1	0	1
2:118803353:C:G	rs61101837	2	118803353	C	G	0.04712	NA	NA	NA	0.102868	rs2422177	4	RN7SL111P	29109	intergenic	0.954	5	5	14	1	0	1
2:118818308:C:T	rs73950031	2	118818308	T	C	0.04054	NA	NA	NA	0.10972	rs2422177	4	INSIG2	27719	intergenic	8.391	5	2	14	1	0	1
2:118827895:G:T	rs7572816	2	118827895	T	G	0.04054	NA	NA	NA	0.10972	rs2422177	4	INSIG2	18132	intergenic	4.452	6	7	15	1	0	1
2:118830459:A:G	rs73950036	2	118830459	G	A	0.04054	NA	NA	NA	0.10972	rs2422177	4	INSIG2	15568	intergenic	6.264	7	5	15	1	0	1
2:118837050:A:G	rs80033323	2	118837050	G	A	0.04034	NA	NA	NA	0.110682	rs2422177	4	INSIG2	8977	intergenic	0.008	7	5	15	1	0	1
2:118852854:C:G	rs60339034	2	118852854	C	G	0.02236	NA	NA	NA	0.101011	rs2422177	4	INSIG2	0	intronic	12.59	6	5	5	1	0	1
2:118854726:C:T	rs72952710	2	118854726	C	T	0.02636	NA	NA	NA	0.115353	rs2422177	4	INSIG2	0	intronic	0.311	7	4	5	1	0	1
2:118858542:A:ATAACT	rs145502201	2	118858542	ATAACT	A	0.03654	NA	NA	NA	0.123858	rs2422177	4	INSIG2	0	intronic	7.504	NA	4	5	1	0	1
2:118860455:G:GA	rs569320630	2	118860455	GA	G	0.04453	NA	NA	NA	0.104043	rs2422177	4	INSIG2	0	intronic	8.607	NA	4	5	1	0	1
2:118885589:A:G	rs75985073	2	118885589	G	A	0.03275	NA	NA	NA	0.135486	rs2422177	4	AC093901.1	4114	intergenic	0.064	7	5	15	1	0	1
2:118889126:A:C	rs116651198	2	118889126	A	C	0.03175	NA	NA	NA	0.136614	rs2422177	4	AC093901.1	577	downstream	3.784	5	5	15	1	0	1
2:118889618:G:T	rs76692321	2	118889618	G	T	0.02196	NA	NA	NA	0.129647	rs2422177	4	AC093901.1	85	downstream	0.848	5	7	15	1	0	1
2:118890442:A:C	rs139958699	2	118890442	C	A	0.03135	NA	NA	NA	0.139103	rs2422177	4	AC093901.1	0	ncRNA_intronic	1.238	7	14	15	1	0	1
2:118892941:A:C	rs77102829	2	118892941	C	A	0.03454	NA	NA	NA	0.145585	rs2422177	4	AC093901.1	0	ncRNA_intronic	3.545	7	13	15	1	0	1
2:118896203:A:G	rs55921937	2	118896203	A	G	0.1685	NA	NA	NA	0.144901	rs2422177	4	AC093901.1	0	ncRNA_intronic	3.839	7	14	15	1	0	1
2:118899387:C:T	2:118899387:C:T	2	118899387	C	T	0.02756	NA	NA	NA	0.183723	rs2422177	4	AC093901.1	0	ncRNA_intronic	0.302	NA	14	15	1	0	1
2:118899424:A:C	rs537553071	2	118899424	A	C	0.05871	NA	NA	NA	0.110132	rs2422177	4	AC093901.1	0	ncRNA_intronic	0.712	NA	14	15	1	0	1
2:118901024:C:T	rs115923715	2	118901024	C	T	0.03794	NA	NA	NA	0.162156	rs2422177	4	AC093901.1	0	ncRNA_intronic	2.693	6	1	15	1	0	1
2:118901679:G:T	rs12618654	2	118901679	T	G	0.07328	NA	NA	NA	0.148715	rs2422177	4	AC093901.1	0	ncRNA_intronic	1.951	6	5	15	1	0	1
2:118901705:G:T	rs116301264	2	118901705	T	G	0.03335	NA	NA	NA	0.166859	rs2422177	4	AC093901.1	0	ncRNA_intronic	2.23	6	5	15	1	0	1
2:118902928:C:CTT	rs140157271	2	118902928	C	CTT	0.1134	NA	NA	NA	0.489139	rs2422177	4	AC093901.1	0	ncRNA_intronic	2.1	NA	5	15	1	0	1
2:118903235:C:G	rs79948650	2	118903235	C	G	0.03375	NA	NA	NA	0.165833	rs2422177	4	AC093901.1	0	ncRNA_intronic	0.797	7	2	15	1	0	1
2:118910805:A:AAAAT	rs150902518	2	118910805	AAAAT	A	0.03275	NA	NA	NA	0.173411	rs2422177	4	AC093901.1	0	ncRNA_intronic	2.718	NA	5	15	1	0	1
2:118910811:A:C	rs538669163	2	118910811	A	C	0.03275	NA	NA	NA	0.173411	rs2422177	4	AC093901.1	0	ncRNA_intronic	7.53	NA	5	15	1	0	1
2:118915409:A:C	rs74497586	2	118915409	C	A	0.03295	NA	NA	NA	0.176084	rs2422177	4	AC093901.1	0	ncRNA_intronic	6.806	6	9	15	1	0	1
2:118915506:C:T	rs13407139	2	118915506	C	T	0.04453	NA	NA	NA	0.182571	rs2422177	4	AC093901.1	0	ncRNA_intronic	4.099	7	9	15	1	0	1
2:118916301:A:T	rs79470965	2	118916301	T	A	0.03295	NA	NA	NA	0.176084	rs2422177	4	AC093901.1	0	ncRNA_intronic	3.938	6	9	15	1	0	1
2:118917584:A:G	rs13388300	2	118917584	G	A	0.04014	NA	NA	NA	0.157392	rs2422177	4	AC093901.1	0	ncRNA_intronic	2.108	6	13	15	1	0	1
2:118919564:C:T	rs115267755	2	118919564	T	C	0.03295	NA	NA	NA	0.176084	rs2422177	4	AC093901.1	0	ncRNA_intronic	8.726	6	5	15	1	0	1
2:118920167:C:T	rs112142623	2	118920167	C	T	0.04014	NA	NA	NA	0.157392	rs2422177	4	AC093901.1	0	ncRNA_intronic	7.848	6	5	15	1	0	1
2:118920294:C:T	rs56167918	2	118920294	C	T	0.04014	NA	NA	NA	0.157392	rs2422177	4	AC093901.1	0	ncRNA_intronic	2.086	NA	5	15	1	0	1
2:118921139:C:T	rs185854603	2	118921139	T	C	0.04453	NA	NA	NA	0.182571	rs2422177	4	AC093901.1	0	ncRNA_intronic	0.122	6	5	15	1	0	1
2:118922262:A:G	rs116368106	2	118922262	A	G	0.03295	NA	NA	NA	0.176084	rs2422177	4	AC093901.1	0	ncRNA_intronic	5.785	6	5	15	1	0	1
2:118923099:C:T	rs10194000	2	118923099	C	T	0.03994	NA	NA	NA	0.156829	rs2422177	4	AC093901.1	0	ncRNA_intronic	1.153	7	5	15	1	0	1
2:118923427:A:G	rs112123962	2	118923427	G	A	0.04453	NA	NA	NA	0.182571	rs2422177	4	AC093901.1	0	ncRNA_intronic	0.31	7	5	15	1	0	1
2:118923850:A:T	rs78352456	2	118923850	A	T	0.03275	NA	NA	NA	0.175579	rs2422177	4	AC093901.1	0	ncRNA_intronic	2.037	4	5	15	1	0	1
2:118924044:C:G	rs116555396	2	118924044	G	C	0.03275	NA	NA	NA	0.175579	rs2422177	4	AC093901.1	0	ncRNA_intronic	1.009	4	5	15	1	0	1
2:118929979:C:T	rs75715412	2	118929979	C	T	0.03315	NA	NA	NA	0.178767	rs2422177	4	AC093901.1	0	ncRNA_intronic	4.258	5	5	15	1	0	1
2:118937172:A:ATG	rs142701808	2	118937172	A	ATG	0.03315	NA	NA	NA	0.178767	rs2422177	4	AC093901.1	0	ncRNA_intronic	0.733	NA	5	15	1	0	1
2:118942146:A:G	rs78745386	2	118942146	A	G	0.07688	NA	NA	NA	0.105034	rs2422177	4	AC093901.1	0	ncRNA_intronic	4.818	7	5	15	1	0	1
2:118942169:C:G	rs184152122	2	118942169	C	G	0.03235	NA	NA	NA	0.211049	rs2422177	4	AC093901.1	0	ncRNA_intronic	5.785	7	5	15	1	0	1
2:118942954:C:CCAGGACGG	rs113900450	2	118942954	CCAGGACGG	C	0.4317	NA	NA	NA	0.334787	rs2422177	4	AC093901.1	0	ncRNA_exonic	19.61	NA	1	2	1	1	1
2:118946727:A:C	rs76224085	2	118946727	A	C	0.03754	NA	NA	NA	0.207859	rs2422177	4	AC093901.1	2764	intergenic	1.08	5	2	14	1	0	1
2:118948533:G:GTCTA	rs36000685	2	118948533	G	GTCTA	0.4028	NA	NA	NA	0.227779	rs2422177	4	AC093901.1	4570	intergenic	0.643	NA	5	14	1	0	1
2:118950009:C:T	rs76139643	2	118950009	T	C	0.03774	NA	NA	NA	0.208378	rs2422177	4	AC093901.1	6046	intergenic	7.667	5	5	14	1	0	1
2:118950534:A:ATTG	rs36096388	2	118950534	ATTG	A	0.1737	NA	NA	NA	0.88464	rs2422177	4	AC093901.1	6571	intergenic	0.245	NA	5	14	1	0	1
2:118952044:C:T	rs79854216	2	118952044	C	T	0.03974	NA	NA	NA	0.152606	rs2422177	4	AC093901.1	8081	intergenic	1.032	6	14	14	1	0	1
2:118953843:A:G	rs78073407	2	118953843	G	A	0.03395	NA	NA	NA	0.125445	rs2422177	4	AC093901.1	9880	intergenic	1.102	5	14	14	1	0	1
2:118954194:A:G	rs75391303	2	118954194	G	A	0.02396	NA	NA	NA	0.140825	rs2422177	4	AC093901.1	10231	intergenic	11.05	5	7	15	1	0	1
2:118954790:A:T	rs79203454	2	118954790	T	A	0.02396	NA	NA	NA	0.140825	rs2422177	4	AC093901.1	10827	intergenic	0.997	5	13	14	1	0	1
2:118956648:C:CATATATAT	2:118956648:C:CATATATAT	2	118956648	C	CATATATAT	0.03355	NA	NA	NA	0.129818	rs2422177	4	AC093901.1	12685	intergenic	0.839	NA	5	14	1	0	1
2:118956648:C:CATATAT	2:118956648:C:CATATAT	2	118956648	C	CATATAT	0.01258	NA	NA	NA	0.129818	rs2422177	4	AC093901.1	12685	NA	0.883	NA	5	14	1	0	1
2:118956648:C:CAT	2:118956648:C:CAT	2	118956648	C	CAT	0.1018	NA	NA	NA	0.129818	rs2422177	4	AC093901.1	12685	NA	0.98	NA	5	14	1	0	1
2:118956938:C:CA	rs561120004	2	118956938	CA	C	0.2782	NA	NA	NA	0.155871	rs2422177	4	AC093901.1	12975	intergenic	0.073	NA	5	14	1	0	1
2:118957386:C:CT	rs5833736	2	118957386	C	CT	0.1921	NA	NA	NA	0.109157	rs2422177	4	AC093901.1	13423	intergenic	0.66	NA	5	14	1	0	1
2:118959261:C:T	rs79931399	2	118959261	T	C	0.02396	NA	NA	NA	0.140825	rs2422177	4	AC093901.1	15298	intergenic	0.789	6	5	14	1	0	1
2:118959675:A:G	rs75166590	2	118959675	G	A	0.02416	NA	NA	NA	0.14127	rs2422177	4	AC093901.1	15712	intergenic	0.112	7	5	14	1	0	1
2:118960278:C:CA	rs35146844	2	118960278	C	CA	0.3075	NA	NA	NA	0.104267	rs2422177	4	AC093901.1	16315	intergenic	7.23	NA	5	14	1	0	1
2:118960883:C:CAT	rs3980380	2	118960883	C	CAT	0.2586	NA	NA	NA	0.198635	rs2422177	4	AC093901.1	16920	intergenic	1.341	NA	5	14	1	0	1
2:118963331:C:T	rs17047862	2	118963331	C	T	0.05511	NA	NA	NA	0.160267	rs2422177	4	AC093901.1	19368	intergenic	1.725	7	5	14	1	0	1
2:118963608:A:AT	rs5833738	2	118963608	AT	A	0.244	NA	NA	NA	0.215108	rs2422177	4	AC093901.1	19645	intergenic	1.549	NA	5	14	1	0	1
2:118965713:C:G	rs114722169	2	118965713	C	G	0.03215	NA	NA	NA	0.11739	rs2422177	4	AC093901.1	21750	intergenic	1.98	5	5	14	1	0	1
2:118967708:A:T	rs3849336	2	118967708	A	T	0.02416	NA	NA	NA	0.14127	rs2422177	4	AC093901.1	23745	intergenic	3.348	6	5	14	1	0	1
2:118970140:C:G	rs7580444	2	118970140	C	G	0.02416	NA	NA	NA	0.14127	rs2422177	4	AC093901.1	26177	intergenic	0.986	6	13	14	1	0	1
2:118971124:A:C	rs6749202	2	118971124	A	C	0.02416	NA	NA	NA	0.14127	rs2422177	4	AC093901.1	27161	intergenic	0.314	6	13	14	1	0	1
2:118971140:T:TAGAAAC	rs201811184	2	118971140	TAGAAAC	T	0.02416	NA	NA	NA	0.14127	rs2422177	4	AC093901.1	27177	intergenic	1.988	NA	13	14	1	0	1
2:118971317:C:T	rs6737590	2	118971317	C	T	0.03215	NA	NA	NA	0.174217	rs2422177	4	AC093901.1	27354	intergenic	0.862	5	13	14	1	0	1
2:118972894:A:C	rs60373850	2	118972894	C	A	0.02416	NA	NA	NA	0.14127	rs2422177	4	AC093901.1	28931	intergenic	0.203	6	9	14	1	0	1
2:118973118:A:ATGG	rs60148244	2	118973118	ATGG	A	0.03235	NA	NA	NA	0.176895	rs2422177	4	AC093901.1	29155	intergenic	0.89	NA	13	14	1	0	1
2:118973149:C:T	rs61617779	2	118973149	C	T	0.03215	NA	NA	NA	0.174217	rs2422177	4	AC093901.1	29186	intergenic	0.013	6	13	14	1	0	1
2:118975417:C:G	rs73947726	2	118975417	G	C	0.05571	NA	NA	NA	0.159371	rs2422177	4	AC093901.1	31454	intergenic	0.945	7	13	14	1	0	1
2:118975880:C:T	rs146164567	2	118975880	C	T	0.02416	NA	NA	NA	0.14127	rs2422177	4	AC093901.1	31917	intergenic	0.559	6	13	14	1	0	1
2:118979733:C:T	rs57891466	2	118979733	T	C	0.05571	NA	NA	NA	0.158861	rs2422177	4	AC093901.1	35770	intergenic	13.88	2b	5	13	1	0	1
2:118980726:A:G	rs6710560	2	118980726	A	G	0.02416	NA	NA	NA	0.14127	rs2422177	4	AC093901.1	36763	intergenic	6.579	5	1	13	1	0	1
2:118981621:C:CTTTTCT	rs200810087	2	118981621	CTTTTCT	C	0.02756	NA	NA	NA	0.135243	rs2422177	4	AC093901.1	37658	intergenic	22.2	NA	1	10	1	0	1
2:118982278:G:T	rs77883434	2	118982278	G	T	0.02436	NA	NA	NA	0.139455	rs2422177	4	AC093901.1	38315	intergenic	14.06	4	1	11	1	0	1
2:118982495:C:CA	rs201783993	2	118982495	C	CA	0.02416	NA	NA	NA	0.14127	rs2422177	4	AC093901.1	38532	intergenic	3.847	NA	1	13	1	0	1
2:118986864:A:T	rs73947728	2	118986864	T	A	0.05551	NA	NA	NA	0.15827	rs2422177	4	AC093901.1	42901	intergenic	8.368	7	5	14	1	0	1
2:118987076:A:C	rs73947730	2	118987076	A	C	0.07029	NA	NA	NA	0.152126	rs2422177	4	AC093901.1	43113	intergenic	0.615	5	5	14	1	0	1
2:118987463:A:G	rs6730359	2	118987463	G	A	0.07748	NA	NA	NA	0.153367	rs2422177	4	AC093901.1	43500	intergenic	2.09	5	5	14	1	0	1
2:118988584:A:ACT	rs56390722	2	118988584	A	ACT	0.3141	NA	NA	NA	0.122973	rs2422177	4	AC093901.1	44621	intergenic	0.527	NA	5	14	1	0	1
2:118989721:C:T	rs7562197	2	118989721	C	T	0.02396	NA	NA	NA	0.138552	rs2422177	4	AC093901.1	45758	intergenic	3.457	5	5	14	1	0	1
2:118989950:C:T	rs73947731	2	118989950	C	T	0.08646	NA	NA	NA	0.14152	rs2422177	4	AC093901.1	45987	intergenic	0.404	6	5	14	1	0	1
2:118990481:C:G	rs75179590	2	118990481	G	C	0.02416	NA	NA	NA	0.136753	rs2422177	4	AC093901.1	46518	intergenic	17.26	5	5	14	1	0	1
2:118990920:A:T	rs17047876	2	118990920	T	A	0.07608	NA	NA	NA	0.155834	rs2422177	4	AC093901.1	46957	intergenic	7.998	7	5	14	1	0	1
2:118993878:C:T	rs17047880	2	118993878	T	C	0.07568	NA	NA	NA	0.154841	rs2422177	4	AC093901.1	49915	intergenic	6.606	6	5	14	1	0	1
2:118995140:A:G	rs6704706	2	118995140	A	G	0.02416	NA	NA	NA	0.136753	rs2422177	4	AC093901.1	51177	intergenic	2.526	4	5	14	0	0	1
2:118995267:A:G	rs17047882	2	118995267	G	A	0.08646	NA	NA	NA	0.14152	rs2422177	4	AC093901.1	51304	intergenic	1.064	4	5	14	0	0	1
2:118995467:C:T	rs17047883	2	118995467	T	C	0.02416	NA	NA	NA	0.136753	rs2422177	4	AC093901.1	51504	intergenic	6.244	7	5	14	0	0	1
2:118995960:A:G	rs73947732	2	118995960	A	G	0.07588	NA	NA	NA	0.154106	rs2422177	4	AC093901.1	51997	intergenic	1.926	7	5	14	0	0	1
2:118996335:A:G	rs6712023	2	118996335	A	G	0.09625	NA	NA	NA	0.163627	rs2422177	4	AC093901.1	52372	intergenic	1.99	7	5	14	0	0	1
2:118996423:G:T	rs10864969	2	118996423	T	G	0.1849	NA	NA	NA	0.152583	rs2422177	4	AC093901.1	52460	intergenic	1.764	7	5	14	0	0	1
2:118996474:C:T	rs116001790	2	118996474	T	C	0.02536	NA	NA	NA	0.130972	rs2422177	4	AC093901.1	52511	intergenic	2.114	7	5	14	0	0	1
2:118997232:G:T	rs61613304	2	118997232	T	G	0.02416	NA	NA	NA	0.136753	rs2422177	4	AC093901.1	53269	intergenic	2.956	7	5	14	0	0	1
2:118998663:C:T	2:118998663:C:T	2	118998663	C	T	0.2486	NA	NA	NA	0.199585	rs2422177	4	AC093901.1	54700	intergenic	2.403	5	5	14	0	0	1
2:118998663:G:T	2:118998663:G:T	2	118998663	T	G	0.0655	NA	NA	NA	0.199585	rs2422177	4	AC093901.1	54700	NA	2.078	NA	5	14	0	0	1
2:119002234:A:ATGTC	rs146327723	2	119002234	ATGTC	A	0.4529	NA	NA	NA	0.108169	rs2422177	4	AC093901.1	58271	intergenic	0.537	NA	5	14	0	0	1
2:119002272:A:G	rs144615260	2	119002272	A	G	0.02556	NA	NA	NA	0.127024	rs2422177	4	AC093901.1	58309	intergenic	0.488	7	5	14	0	0	1
2:119003347:C:G	rs140824177	2	119003347	G	C	0.02516	NA	NA	NA	0.123946	rs2422177	4	AC093901.1	59384	intergenic	0.312	6	5	14	0	0	1
2:119003581:C:CA	rs58965573	2	119003581	C	CA	0.3502	NA	NA	NA	0.222294	rs2422177	4	AC093901.1	59618	intergenic	1.659	NA	5	14	0	0	1
2:119008442:C:T	rs17047915	2	119008442	C	T	0.02516	NA	NA	NA	0.121858	rs2422177	4	AC093901.1	64479	intergenic	4.296	5	5	14	0	0	1
2:119011086:A:G	rs7608856	2	119011086	G	A	0.02556	NA	NA	NA	0.118733	rs2422177	4	AC093901.1	67123	intergenic	0.089	7	5	14	0	0	1
2:119012753:A:G	rs6542440	2	119012753	A	G	0.07548	NA	NA	NA	0.177707	rs2422177	4	AC093901.1	68790	intergenic	3.23	7	5	14	0	0	1
2:119027543:C:T	rs114934206	2	119027543	C	T	0.02456	NA	NA	NA	0.118551	rs2422177	4	AC093901.1	83580	intergenic	7.854	6	7	14	0	0	1
2:119029514:A:G	rs75914577	2	119029514	A	G	0.02236	NA	NA	NA	0.128127	rs2422177	4	AC093901.1	85551	intergenic	2.833	5	5	14	0	0	1
2:119031038:A:G	rs17047936	2	119031038	A	G	0.02516	NA	NA	NA	0.117996	rs2422177	4	AC093901.1	87075	intergenic	5.058	6	5	14	0	0	1
2:119031696:A:T	rs79641644	2	119031696	A	T	0.02516	NA	NA	NA	0.117996	rs2422177	4	AC093901.1	87733	intergenic	0.691	7	5	14	0	0	1
2:119040685:A:G	rs79358811	2	119040685	G	A	0.02416	NA	NA	NA	0.115266	rs2422177	4	AC093901.1	96722	intergenic	9.121	6	5	14	0	0	1
2:119041442:A:T	rs6751226	2	119041442	A	T	0.02576	NA	NA	NA	0.125417	rs2422177	4	AC093901.1	97479	intergenic	4.344	7	5	14	0	0	1
2:119042790:A:G	rs79525189	2	119042790	G	A	0.02296	NA	NA	NA	0.103909	rs2422177	4	AC093901.1	98827	intergenic	1.93	6	9	14	0	0	1
2:119046657:T:TG	rs71945268	2	119046657	T	TG	0.1605	NA	NA	NA	0.122118	rs2422177	4	AC093901.1	102694	intergenic	0.666	NA	5	14	0	0	1
2:119046659:C:T	rs554483349	2	119046659	T	C	0.1605	NA	NA	NA	0.122118	rs2422177	4	AC093901.1	102696	intergenic	0.102	NA	5	14	0	0	1
2:119047403:A:G	rs74451667	2	119047403	G	A	0.02396	NA	NA	NA	0.116844	rs2422177	4	AC093901.1	103440	intergenic	4.906	6	5	14	0	0	1
2:119049274:A:G	rs10164525	2	119049274	A	G	0.07887	NA	NA	NA	0.204769	rs2422177	4	AC093901.1	105311	intergenic	4.076	3a	7	15	0	0	1
2:119050338:A:G	rs61023541	2	119050338	G	A	0.02616	NA	NA	NA	0.122531	rs2422177	4	AC093901.1	106375	intergenic	0.763	6	7	15	0	0	1
2:119058677:A:G	rs116838724	2	119058677	G	A	0.02396	NA	NA	NA	0.112724	rs2422177	4	AC093901.1	114714	intergenic	0.332	5	14	15	0	0	1
2:119062589:A:C	2:119062589:A:C	2	119062589	A	C	0.01837	NA	NA	NA	0.152576	rs2422177	4	AC093901.1	118626	intergenic	4.011	NA	14	15	0	0	1
2:119062589:A:G	2:119062589:A:G	2	119062589	A	G	0.121	NA	NA	NA	0.152576	rs2422177	4	AC093901.1	118626	NA	3.643	NA	14	15	0	0	1
2:119062632:A:G	rs554059714	2	119062632	A	G	0.07188	NA	NA	NA	0.16132	rs2422177	4	AC093901.1	118669	intergenic	4.025	NA	14	15	0	0	1
2:119062641:C:T	rs141303374	2	119062641	T	C	0.07188	NA	NA	NA	0.16132	rs2422177	4	AC093901.1	118678	intergenic	3.968	6	14	15	0	0	1
2:119062675:A:G	rs111214939	2	119062675	A	G	0.07188	NA	NA	NA	0.16132	rs2422177	4	AC093901.1	118712	intergenic	3.923	6	14	15	0	0	1
2:119062766:G:T	rs180711820	2	119062766	T	G	0.3143	NA	NA	NA	0.126733	rs2422177	4	AC093901.1	118803	intergenic	1.769	6	14	15	0	0	1
2:119063177:C:G	rs9679572	2	119063177	C	G	0.1124	NA	NA	NA	0.123271	rs2422177	4	AC093901.1	119214	intergenic	1.372	6	14	14	0	0	1
2:119063275:CAT:CATAT	rs541893000	2	119063275	CAT	CATAT	0.1268	NA	NA	NA	0.116262	rs2422177	4	AC093901.1	119312	intergenic	NA	NA	14	14	0	0	1
2:119070167:C:T	rs6542446	2	119070167	C	T	0.02576	NA	NA	NA	0.121277	rs2422177	4	AC093901.1	126204	intergenic	10.77	5	5	14	0	0	1
2:119071373:C:T	rs4074753	2	119071373	T	C	0.02576	NA	NA	NA	0.121277	rs2422177	4	AC093901.1	127410	intergenic	4.059	3a	2	14	0	0	1
2:119071459:C:G	rs4076101	2	119071459	G	C	0.02576	NA	NA	NA	0.121277	rs2422177	4	AC093901.1	127496	intergenic	1.578	3a	5	14	0	0	1
2:119084450:C:T	rs75740821	2	119084450	C	T	0.02276	NA	NA	NA	0.115863	rs2422177	4	AC093901.1	140487	intergenic	0.776	7	14	15	0	0	1
2:119086309:A:G	rs74424664	2	119086309	G	A	0.02396	NA	NA	NA	0.110692	rs2422177	4	AC093901.1	142346	intergenic	1.304	6	9	15	0	0	1
2:119086845:C:T	rs78705471	2	119086845	C	T	0.02556	NA	NA	NA	0.12078	rs2422177	4	AC093901.1	142882	intergenic	0.38	7	13	15	0	0	1
2:119090709:C:T	rs6713562	2	119090709	C	T	0.02636	NA	NA	NA	0.119002	rs2422177	4	AC093901.1	146746	intergenic	11.94	6	5	15	0	0	1
2:119094812:A:C	rs57191235	2	119094812	A	C	0.02636	NA	NA	NA	0.11872	rs2422177	4	AC093901.1	150849	intergenic	7.075	6	5	15	0	0	1
2:119095747:A:G	rs79321209	2	119095747	G	A	0.02057	NA	NA	NA	0.115166	rs2422177	4	AC093901.1	151784	intergenic	5.445	7	5	15	0	0	1
2:119101297:A:AT	rs111887412	2	119101297	A	AT	0.1488	NA	NA	NA	0.134138	rs2422177	4	AC093901.1	157334	intergenic	0.944	NA	5	15	0	0	1
2:119102733:C:T	rs61523561	2	119102733	C	T	0.02776	NA	NA	NA	0.120601	rs2422177	4	AC093901.1	158770	intergenic	0.087	6	5	15	0	0	1
2:119102843:A:G	rs7577453	2	119102843	G	A	0.02776	NA	NA	NA	0.120601	rs2422177	4	AC093901.1	158880	intergenic	0.357	7	5	15	0	0	1
2:119104357:C:T	rs79525866	2	119104357	C	T	0.02636	NA	NA	NA	0.11872	rs2422177	4	AC093901.1	160394	intergenic	0.038	5	5	15	0	0	1
2:119106688:C:T	rs57056348	2	119106688	C	T	0.02436	NA	NA	NA	0.109677	rs2422177	4	AC093901.1	162725	intergenic	0.795	6	5	15	0	0	1
2:119107199:A:G	rs115263781	2	119107199	A	G	0.02636	NA	NA	NA	0.11872	rs2422177	4	AC093901.1	163236	intergenic	4.319	7	5	15	0	0	1
2:119108326:C:T	rs6740883	2	119108326	T	C	0.02636	NA	NA	NA	0.11872	rs2422177	4	AC093901.1	164363	intergenic	2.607	5	5	15	0	0	1
2:119108633:C:T	rs6741244	2	119108633	T	C	0.02636	NA	NA	NA	0.11872	rs2422177	4	AC093901.1	164670	intergenic	10.14	6	5	15	0	0	1
2:119113135:C:T	rs141341766	2	119113135	T	C	0.02436	NA	NA	NA	0.109677	rs2422177	4	AC093901.1	169172	intergenic	4.389	7	9	15	0	0	1
2:119114425:A:G	rs6740784	2	119114425	A	G	0.02636	NA	NA	NA	0.11872	rs2422177	4	AC093901.1	170462	intergenic	1.202	6	9	15	0	0	1
2:119114983:C:T	rs74451150	2	119114983	T	C	0.02636	NA	NA	NA	0.11872	rs2422177	4	AC093901.1	171020	intergenic	11.88	7	9	15	0	0	1
2:119116331:A:G	rs115824060	2	119116331	A	G	0.02436	NA	NA	NA	0.109677	rs2422177	4	AC093901.1	172368	intergenic	3.745	7	9	15	0	0	1
2:119116586:A:G	rs114517349	2	119116586	A	G	0.02436	NA	NA	NA	0.109677	rs2422177	4	AC093901.1	172623	intergenic	14.14	6	9	15	0	0	1
2:119121536:C:T	rs78827047	2	119121536	T	C	0.02636	NA	NA	NA	0.11872	rs2422177	4	AC093901.1	177573	intergenic	0.386	7	7	15	0	0	1
2:119124200:C:G	rs78164470	2	119124200	G	C	0.02636	NA	NA	NA	0.11872	rs2422177	4	AC093901.1	180237	intergenic	9.149	6	13	15	0	0	1
2:119125337:A:G	rs6706357	2	119125337	A	G	0.02636	NA	NA	NA	0.11872	rs2422177	4	AC093901.1	181374	intergenic	7.121	6	7	15	0	0	1
2:119126830:A:G	rs80163814	2	119126830	G	A	0.02636	NA	NA	NA	0.11872	rs2422177	4	AC093901.1	182867	intergenic	0.01	6	5	15	0	0	1
2:119128948:C:G	rs80345255	2	119128948	G	C	0.02316	NA	NA	NA	0.114695	rs2422177	4	AC093901.1	184985	intergenic	17.98	7	5	15	0	0	1
2:119132704:G:T	rs7567920	2	119132704	T	G	0.03594	NA	NA	NA	0.114328	rs2422177	4	AC093901.1	188741	intergenic	2.489	4	5	15	0	0	1
2:119136512:C:T	rs35211984	2	119136512	C	T	0.0617	NA	NA	NA	0.122259	rs2422177	4	AC093901.1	192549	intergenic	0.442	7	5	15	0	0	1
2:119143606:A:G	rs116323127	2	119143606	A	G	0.02436	NA	NA	NA	0.119902	rs2422177	4	AC093901.1	199643	intergenic	4.244	5	5	15	0	0	1
2:119145275:A:G	rs6757682	2	119145275	G	A	0.0615	NA	NA	NA	0.12755	rs2422177	4	AC093901.1	201312	intergenic	1.706	2b	5	15	0	0	1
2:119148774:G:T	rs80175578	2	119148774	G	T	0.02496	NA	NA	NA	0.123458	rs2422177	4	AC093901.1	204811	intergenic	2.123	7	5	15	0	0	1
2:119149425:C:T	rs76090176	2	119149425	C	T	0.02456	NA	NA	NA	0.118551	rs2422177	4	AC093901.1	205462	intergenic	1.264	6	5	15	0	0	1
2:119157198:A:C	rs57646034	2	119157198	C	A	0.02796	NA	NA	NA	0.133449	rs2422177	4	AC093901.1	213235	intergenic	0.679	7	5	15	0	0	1
2:119158755:C:T	rs13432736	2	119158755	C	T	0.02736	NA	NA	NA	0.129886	rs2422177	4	AC093901.1	214792	intergenic	1.846	6	5	15	0	0	1
2:119160633:C:CCCAGCCATCTCCT	rs6146898	2	119160633	C	CCCAGCCATCTCCT	0.3335	NA	NA	NA	0.118409	rs2422177	4	AC093901.1	216670	intergenic	1.183	NA	5	15	0	0	1
2:119164363:G:T	rs13408736	2	119164363	G	T	0.02776	NA	NA	NA	0.131162	rs2422177	4	AC093901.1	220400	intergenic	0.391	7	5	15	0	0	1
2:119168405:A:G	rs7587137	2	119168405	A	G	0.04653	NA	NA	NA	0.127566	rs2422177	4	AC093901.1	224442	intergenic	2.123	6	5	15	0	0	1
2:119171702:G:T	rs147521745	2	119171702	G	T	0.04673	NA	NA	NA	0.128133	rs2422177	4	AC093901.1	227739	intergenic	1.22	7	5	15	0	0	1
2:119176016:C:T	rs13405237	2	119176016	C	T	0.02815	NA	NA	NA	0.132457	rs2422177	4	AC093901.1	232053	intergenic	0.387	5	5	15	0	0	1
2:119176836:C:T	rs10496546	2	119176836	C	T	0.02776	NA	NA	NA	0.131162	rs2422177	4	AC093901.1	232873	intergenic	6.462	7	5	15	0	0	1
2:119181948:G:T	rs2422304	2	119181948	G	T	0.02696	NA	NA	NA	0.128878	rs2422177	4	AC093901.1	237985	intergenic	0.307	6	2	15	0	0	1
2:119184928:C:G	rs77736442	2	119184928	G	C	0.02077	NA	NA	NA	0.113404	rs2422177	4	AC093901.1	240965	intergenic	0.745	7	5	15	0	0	1
2:119192518:C:T	rs76784443	2	119192518	T	C	0.02736	NA	NA	NA	0.12185	rs2422177	4	AC093901.1	248555	intergenic	3.764	7	5	15	0	0	1
2:119197604:C:T	rs10207066	2	119197604	C	T	0.03474	NA	NA	NA	0.127544	rs2422177	4	AC093901.1	253641	intergenic	0.918	7	5	15	0	0	1
2:119207368:C:G	rs13418554	2	119207368	G	C	0.03395	NA	NA	NA	0.105247	rs2422177	4	AC093901.1	263405	intergenic	0.52	6	5	15	0	0	1
2:119207552:A:C	rs10187703	2	119207552	A	C	0.03574	NA	NA	NA	0.107419	rs2422177	4	AC093901.1	263589	intergenic	0.155	6	5	15	0	0	1
2:119212038:A:G	rs6749510	2	119212038	A	G	0.03574	NA	NA	NA	0.107419	rs2422177	4	AC093901.1	268075	intergenic	1.565	7	5	15	0	0	1
2:119243103:A:G	rs6745088	2	119243103	G	A	0.02356	NA	NA	NA	0.101739	rs2422177	4	AC093901.1	299140	intergenic	0.28	7	9	15	0	0	1
2:119846964:C:CT	rs11290905	2	119846964	C	CT	0.2177	NA	NA	NA	0.123655	rs2422177	4	C1QL2	66854	intergenic	0.645	NA	14	15	0	0	1
3:14348737:T:TG	rs11429695	3	14348737	TG	T	0.1879	NA	NA	NA	0.149544	rs13091718	5	RP11-536I6.2	3391	intergenic	1.451	NA	5	14	1	0	1
3:14357454:A:AC	rs34628694	3	14357454	A	AC	0.1643	NA	NA	NA	0.112926	rs13091718	5	RP11-536I6.2	12108	intergenic	0.21	NA	5	14	1	0	1
3:14398510:C:CAA	rs10577494	3	14398510	C	CAA	0.2504	NA	NA	NA	0.177687	rs13091718	5	RP11-536I6.1	4441	intergenic	1.653	NA	5	15	1	0	1
4:14174347:A:G	rs28838326	4	14174347	G	A	0.4191	NA	NA	NA	0.132978	rs1968315	6	RP11-669M16.1	0	ncRNA_intronic	1.564	7	1	15	1	1	1
4:14174359:A:AATT	rs201657284	4	14174359	A	AATT	0.2915	NA	NA	NA	0.134763	rs1968315	6	RP11-669M16.1	0	ncRNA_intronic	1.446	NA	1	15	1	1	1
4:14190925:GA:GAA	rs113620689	4	14190925	GA	GAA	0.145	NA	NA	NA	0.148083	rs1968315	6	RP11-669M16.1	0	ncRNA_intronic	NA	NA	9	15	1	0	1
4:14190925:G:GA	rs551454945	4	14190925	GA	G	0.1558	NA	NA	NA	0.148083	rs1968315	6	RP11-669M16.1	0	ncRNA_intronic	0.637	NA	9	15	1	0	1
4:14204735:A:C	rs76582856	4	14204735	C	A	0.03934	NA	NA	NA	0.161288	rs1968315	6	RP11-669M16.1	0	ncRNA_intronic	0.259	6	9	15	1	0	1
4:14211760:C:T	rs12507042	4	14211760	T	C	0.06849	NA	NA	NA	0.321028	rs1968315	6	RP11-669M16.1	0	ncRNA_intronic	0.51	7	14	15	1	0	1
4:14211768:C:T	rs12502261	4	14211768	C	T	0.06869	NA	NA	NA	0.322	rs1968315	6	RP11-669M16.1	0	ncRNA_intronic	0.257	6	14	15	1	0	1
4:14211779:C:G	rs12502264	4	14211779	C	G	0.06869	NA	NA	NA	0.319745	rs1968315	6	RP11-669M16.1	0	ncRNA_intronic	0.17	6	14	15	1	0	1
4:14218343:A:T	rs185899274	4	14218343	T	A	0.0653	NA	NA	NA	0.299211	rs1968315	6	RP11-669M16.1	0	ncRNA_intronic	0.304	6	5	15	1	0	1
4:14218347:A:T	rs58591947	4	14218347	A	T	0.121	NA	NA	NA	0.451335	rs1968315	6	RP11-669M16.1	0	ncRNA_intronic	0.344	6	5	15	1	0	1
4:14220966:C:CA	rs527253170	4	14220966	CA	C	0.3001	NA	NA	NA	0.144148	rs1968315	6	RP11-669M16.1	0	ncRNA_intronic	3.587	NA	2	15	1	0	1
4:14227179:A:T	rs188093377	4	14227179	A	T	0.1577	NA	NA	NA	0.352672	rs1968315	6	RP11-669M16.1	0	ncRNA_intronic	0.008	6	5	15	1	0	1
4:14227185:T:TA	rs533904379	4	14227185	T	TA	0.1326	NA	NA	NA	0.430114	rs1968315	6	RP11-669M16.1	0	ncRNA_intronic	0.603	NA	5	15	1	0	1
4:14229052:C:CA	rs11319113	4	14229052	CA	C	0.3423	NA	NA	NA	0.117429	rs1968315	6	RP11-669M16.1	0	ncRNA_intronic	1.493	NA	5	15	1	0	1
4:14232960:T:TC	rs200481048	4	14232960	TC	T	0.2434	NA	NA	NA	0.176781	rs1968315	6	RP11-669M16.1	0	ncRNA_intronic	0.03	NA	5	15	1	0	1
4:14251993:C:CA	rs34228435	4	14251993	C	CA	0.3508	NA	NA	NA	0.217377	rs1968315	6	RP11-669M16.1	7555	intergenic	0.411	NA	5	15	1	0	1
4:14266019:A:AT	rs5856232	4	14266019	A	AT	0.4607	NA	NA	NA	0.131484	rs1968315	6	RP11-669M16.1	21581	intergenic	1.286	NA	5	15	1	0	1
4:14279000:T:TC	rs141190228	4	14279000	T	TC	0.1392	NA	NA	NA	0.206346	rs1968315	6	RP11-669M16.1	34562	intergenic	0.118	NA	5	15	1	0	1
4:67076952:C:CA	rs71209315	4	67076952	CA	C	0.06789	NA	NA	NA	0.109265	rs67668930	7	RP11-25H12.1	61221	intergenic	0.762	NA	9	15	0	0	1
4:67115034:A:T	4:67115034:A:T	4	67115034	A	T	0.155	NA	NA	NA	0.154821	rs67668930	7	MIR1269A	27507	intergenic	0.237	6	9	15	1	0	1
4:67115034:C:T	4:67115034:C:T	4	67115034	T	C	0.07288	NA	NA	NA	0.154821	rs67668930	7	MIR1269A	27507	NA	0.211	NA	9	15	1	0	1
4:67118119:G:GT	rs112592651	4	67118119	G	GT	0.07728	NA	NA	NA	0.174516	rs67668930	7	MIR1269A	24422	intergenic	0.971	NA	15	15	1	0	1
4:67119324:A:G	rs76677775	4	67119324	G	A	0.01597	NA	NA	NA	0.108191	rs67668930	7	MIR1269A	23217	intergenic	0.675	6	15	15	1	0	1
4:67120048:C:G	rs28706792	4	67120048	C	G	0.05891	NA	NA	NA	0.130441	rs67668930	7	MIR1269A	22493	intergenic	0.75	7	15	15	1	0	1
4:67120146:C:T	rs28615924	4	67120146	C	T	0.0595	NA	NA	NA	0.128589	rs67668930	7	MIR1269A	22395	intergenic	0.012	6	15	15	1	0	1
4:67120887:A:G	rs7441315	4	67120887	G	A	0.05891	NA	NA	NA	0.130441	rs67668930	7	MIR1269A	21654	intergenic	3.715	6	15	15	1	0	1
4:67121015:A:G	rs186788947	4	67121015	G	A	0.02077	NA	NA	NA	0.126392	rs67668930	7	MIR1269A	21526	intergenic	0.04	7	15	15	1	0	1
4:67121326:C:T	rs140960749	4	67121326	T	C	0.02077	NA	NA	NA	0.126392	rs67668930	7	MIR1269A	21215	intergenic	2.802	6	15	15	1	0	1
4:67121535:A:G	rs28844096	4	67121535	A	G	0.05891	NA	NA	NA	0.130441	rs67668930	7	MIR1269A	21006	intergenic	0.444	7	15	15	1	0	1
4:67121559:A:G	rs13353821	4	67121559	A	G	0.05891	NA	NA	NA	0.130441	rs67668930	7	MIR1269A	20982	intergenic	0.411	6	15	15	1	0	1
4:67121750:A:G	rs189302083	4	67121750	A	G	0.02077	NA	NA	NA	0.126392	rs67668930	7	MIR1269A	20791	intergenic	0.452	7	9	15	1	0	1
4:67123214:A:G	rs4331822	4	67123214	G	A	0.1046	NA	NA	NA	0.117865	rs67668930	7	MIR1269A	19327	intergenic	0.469	7	9	15	1	0	1
4:67123221:G:T	rs4282239	4	67123221	T	G	0.103	NA	NA	NA	0.118643	rs67668930	7	MIR1269A	19320	intergenic	0.842	7	9	15	1	0	1
4:67123270:G:T	rs4331823	4	67123270	G	T	0.1054	NA	NA	NA	0.117988	rs67668930	7	MIR1269A	19271	intergenic	0.401	7	9	15	1	0	1
4:67123982:C:T	rs3866375	4	67123982	C	T	0.05451	NA	NA	NA	0.122641	rs67668930	7	MIR1269A	18559	intergenic	0.37	7	9	15	1	0	1
4:67124061:A:G	rs3866376	4	67124061	G	A	0.05451	NA	NA	NA	0.122641	rs67668930	7	MIR1269A	18480	intergenic	0.324	7	9	15	1	0	1
4:67124210:A:T	rs17086927	4	67124210	T	A	0.02077	NA	NA	NA	0.126392	rs67668930	7	MIR1269A	18331	intergenic	1.496	7	9	15	1	0	1
4:67124397:A:C	rs77346205	4	67124397	A	C	0.02077	NA	NA	NA	0.126392	rs67668930	7	MIR1269A	18144	intergenic	1.86	6	9	15	1	0	1
4:67124994:G:T	rs57697519	4	67124994	G	T	0.02196	NA	NA	NA	0.117287	rs67668930	7	MIR1269A	17547	intergenic	0.085	7	9	15	1	0	1
4:67126867:C:T	rs58334612	4	67126867	C	T	0.02196	NA	NA	NA	0.117287	rs67668930	7	MIR1269A	15674	intergenic	2.267	7	9	15	1	0	1
4:67127843:A:T	rs76352984	4	67127843	A	T	0.01478	NA	NA	NA	0.120289	rs67668930	7	MIR1269A	14698	intergenic	2.101	6	9	15	1	0	1
4:67130004:C:T	rs13150763	4	67130004	C	T	0.04453	NA	NA	NA	0.472312	rs67668930	7	MIR1269A	12537	intergenic	3.084	6	9	15	1	0	1
4:67131314:T:TTG	rs142990272	4	67131314	TTG	T	0.03375	NA	NA	NA	0.33561	rs67668930	7	MIR1269A	11227	intergenic	0.319	NA	9	15	1	0	1
4:67132478:A:G	rs114112941	4	67132478	G	A	0.01418	NA	NA	NA	0.127102	rs67668930	7	MIR1269A	10063	intergenic	5.394	5	9	15	1	0	1
4:67132552:C:G	4:67132552:C:G	4	67132552	G	C	0.01617	NA	NA	NA	0.205485	rs67668930	7	MIR1269A	9989	intergenic	1.687	5	9	15	1	0	1
4:67133839:A:G	rs73239135	4	67133839	A	G	0.04593	NA	NA	NA	0.272519	rs67668930	7	MIR1269A	8702	intergenic	5.587	7	9	15	1	0	1
4:67134647:A:ACC	rs140069595	4	67134647	A	ACC	0.02476	NA	NA	NA	0.258733	rs67668930	7	MIR1269A	7894	intergenic	0.831	NA	9	15	1	0	1
4:67135388:C:T	rs114373747	4	67135388	C	T	0.01637	NA	NA	NA	0.212724	rs67668930	7	MIR1269A	7153	intergenic	1.929	7	15	15	1	0	1
4:67137565:C:G	rs113200922	4	67137565	C	G	0.01637	NA	NA	NA	0.212724	rs67668930	7	MIR1269A	4976	intergenic	0.96	6	9	15	1	0	1
4:67140369:A:G	rs73239137	4	67140369	G	A	0.01637	NA	NA	NA	0.212724	rs67668930	7	MIR1269A	2172	intergenic	17.97	6	15	15	1	0	1
4:67142948:A:C	rs73239140	4	67142948	A	C	0.01198	NA	NA	NA	0.147443	rs67668930	7	MIR1269A	301	downstream	0.824	6	9	15	1	0	1
4:67143279:A:G	rs73239141	4	67143279	A	G	0.03694	NA	NA	NA	0.429118	rs67668930	7	MIR1269A	632	downstream	1.262	6	9	15	1	0	1
4:67144102:T:TGT	4:67144102:T:TGT	4	67144102	T	TGT	0.03794	NA	NA	NA	0.381338	rs67668930	7	MIR1269A	1455	intergenic	NA	NA	9	15	1	0	1
4:67144238:C:G	rs73239142	4	67144238	C	G	0.01637	NA	NA	NA	0.212724	rs67668930	7	MIR1269A	1591	intergenic	0.975	6	9	15	1	0	1
4:67144804:C:T	rs73239143	4	67144804	C	T	0.01637	NA	NA	NA	0.212724	rs67668930	7	MIR1269A	2157	intergenic	2.025	7	9	15	1	0	1
4:67144810:C:T	rs77407182	4	67144810	C	T	0.01637	NA	NA	NA	0.212724	rs67668930	7	MIR1269A	2163	intergenic	1.528	7	9	15	1	0	1
4:67144926:A:G	rs73239146	4	67144926	A	G	0.03714	NA	NA	NA	0.43136	rs67668930	7	MIR1269A	2279	intergenic	5.393	5	9	15	1	0	1
4:67145413:A:T	rs113675911	4	67145413	T	A	0.03674	NA	NA	NA	0.426878	rs67668930	7	MIR1269A	2766	intergenic	1.571	7	15	15	1	0	1
4:67145482:C:G	rs181741454	4	67145482	C	G	0.01637	NA	NA	NA	0.212724	rs67668930	7	MIR1269A	2835	intergenic	0.046	6	15	15	1	0	1
4:67145808:A:AAATAT	rs202189528	4	67145808	A	AAATAT	0.02616	NA	NA	NA	0.320439	rs67668930	7	MIR1269A	3161	intergenic	5.379	NA	15	15	1	0	1
4:67146219:A:G	rs73239147	4	67146219	A	G	0.03714	NA	NA	NA	0.43136	rs67668930	7	MIR1269A	3572	intergenic	1.145	6	15	15	1	0	1
4:67147700:A:C	rs73239149	4	67147700	A	C	0.03694	NA	NA	NA	0.434169	rs67668930	7	MIR1269A	5053	intergenic	1.833	5	9	15	1	0	1
4:67148089:A:T	rs10027103	4	67148089	T	A	0.4093	NA	NA	NA	0.180395	rs67668930	7	MIR1269A	5442	intergenic	2.128	7	9	15	1	0	1
4:67148207:A:C	rs1018262	4	67148207	C	A	0.03694	NA	NA	NA	0.434169	rs67668930	7	MIR1269A	5560	intergenic	1.108	NA	9	15	1	0	1
4:67148239:C:T	rs1018261	4	67148239	C	T	0.03395	NA	NA	NA	0.400752	rs67668930	7	MIR1269A	5592	intergenic	0.559	NA	9	15	1	0	1
4:67149550:A:G	rs73239154	4	67149550	A	G	0.03694	NA	NA	NA	0.434169	rs67668930	7	MIR1269A	6903	intergenic	1.382	6	9	15	1	0	1
4:67150204:C:T	rs13148856	4	67150204	T	C	0.07907	NA	NA	NA	0.378053	rs67668930	7	MIR1269A	7557	intergenic	0.924	6	9	15	1	0	1
4:67150212:C:T	rs578205719	4	67150212	T	C	0.01637	NA	NA	NA	0.212724	rs67668930	7	MIR1269A	7565	intergenic	1.204	NA	9	15	1	0	1
4:67150425:A:G	rs73239156	4	67150425	G	A	0.01617	NA	NA	NA	0.215957	rs67668930	7	MIR1269A	7778	intergenic	0.169	7	9	15	1	0	1
4:67150787:C:G	rs79598564	4	67150787	G	C	0.01358	NA	NA	NA	0.124726	rs67668930	7	MIR1269A	8140	intergenic	5.79	7	9	15	1	0	1
4:67150936:C:T	rs80170943	4	67150936	C	T	0.03654	NA	NA	NA	0.429688	rs67668930	7	MIR1269A	8289	intergenic	1.195	5	8	15	1	0	1
4:67151007:C:G	rs73239159	4	67151007	C	G	0.03494	NA	NA	NA	0.411842	rs67668930	7	MIR1269A	8360	intergenic	0.107	5	7	15	1	0	1
4:67151161:C:T	rs77359391	4	67151161	T	C	0.03734	NA	NA	NA	0.433917	rs67668930	7	MIR1269A	8514	intergenic	0.951	6	7	15	1	0	1
4:67151177:C:T	rs73241121	4	67151177	T	C	0.03714	NA	NA	NA	0.436413	rs67668930	7	MIR1269A	8530	intergenic	1.766	6	7	15	1	0	1
4:67151204:C:T	rs76959533	4	67151204	T	C	0.03714	NA	NA	NA	0.436413	rs67668930	7	MIR1269A	8557	intergenic	1.487	7	9	15	1	0	1
4:67151431:C:T	rs73241123	4	67151431	T	C	0.03714	NA	NA	NA	0.436413	rs67668930	7	MIR1269A	8784	intergenic	8.136	7	9	15	1	0	1
4:67151843:C:T	rs60370268	4	67151843	T	C	0.01637	NA	NA	NA	0.212724	rs67668930	7	MIR1269A	9196	intergenic	2.207	7	9	15	1	0	1
4:67151980:C:T	rs58941508	4	67151980	T	C	0.03674	NA	NA	NA	0.426878	rs67668930	7	MIR1269A	9333	intergenic	10.82	6	9	15	1	0	1
4:67153342:C:T	rs112164388	4	67153342	C	T	0.02875	NA	NA	NA	0.369244	rs67668930	7	MIR1269A	10695	intergenic	0.31	6	9	15	1	0	1
4:67153358:A:AT	rs146132689	4	67153358	A	AT	0.02875	NA	NA	NA	0.369244	rs67668930	7	MIR1269A	10711	intergenic	0.642	NA	9	15	1	0	1
4:67153367:C:T	rs112805882	4	67153367	T	C	0.02796	NA	NA	NA	0.360613	rs67668930	7	MIR1269A	10720	intergenic	0.607	6	9	15	1	0	1
4:67153558:A:C	rs73241132	4	67153558	C	A	0.01498	NA	NA	NA	0.220145	rs67668930	7	MIR1269A	10911	intergenic	0.399	7	14	15	1	0	1
4:67153868:G:T	rs73241134	4	67153868	T	G	0.02436	NA	NA	NA	0.327538	rs67668930	7	MIR1269A	11221	intergenic	2.1	7	14	15	1	0	1
4:67154055:C:T	rs73241135	4	67154055	T	C	0.01498	NA	NA	NA	0.220145	rs67668930	7	MIR1269A	11408	intergenic	6.366	6	14	15	1	0	1
4:67154274:A:G	rs73241137	4	67154274	A	G	0.02436	NA	NA	NA	0.327538	rs67668930	7	MIR1269A	11627	intergenic	1.814	6	9	15	1	0	1
4:67154385:A:C	rs73241138	4	67154385	C	A	0.02815	NA	NA	NA	0.368075	rs67668930	7	MIR1269A	11738	intergenic	0.457	6	9	15	1	0	1
4:67154598:A:C	rs76983790	4	67154598	A	C	0.02815	NA	NA	NA	0.368075	rs67668930	7	MIR1269A	11951	intergenic	3.407	6	9	15	1	0	1
4:67154925:A:C	rs79511961	4	67154925	C	A	0.02815	NA	NA	NA	0.368075	rs67668930	7	MIR1269A	12278	intergenic	1.528	7	9	15	1	0	1
4:67154945:A:G	rs73241139	4	67154945	G	A	0.02436	NA	NA	NA	0.327538	rs67668930	7	MIR1269A	12298	intergenic	8.092	7	9	15	1	0	1
4:67154992:A:T	rs73241140	4	67154992	T	A	0.01498	NA	NA	NA	0.220145	rs67668930	7	MIR1269A	12345	intergenic	0.018	6	9	15	1	0	1
4:67155179:A:G	rs73241142	4	67155179	A	G	0.02436	NA	NA	NA	0.327538	rs67668930	7	MIR1269A	12532	intergenic	1.402	5	9	15	1	0	1
4:67155362:A:G	rs73241145	4	67155362	G	A	0.02815	NA	NA	NA	0.368075	rs67668930	7	MIR1269A	12715	intergenic	1.908	6	9	15	1	0	1
4:67156031:A:G	rs56664697	4	67156031	A	G	0.01498	NA	NA	NA	0.220145	rs67668930	7	MIR1269A	13384	intergenic	1.473	7	9	15	1	0	1
4:67156554:G:T	rs73241147	4	67156554	G	T	0.01498	NA	NA	NA	0.220145	rs67668930	7	MIR1269A	13907	intergenic	0.625	7	9	15	1	0	1
4:67158229:C:T	rs74890994	4	67158229	C	T	0.02815	NA	NA	NA	0.368075	rs67668930	7	MIR1269A	15582	intergenic	0.604	7	9	15	1	0	1
4:67158531:A:G	rs73241148	4	67158531	A	G	0.02476	NA	NA	NA	0.32643	rs67668930	7	MIR1269A	15884	intergenic	1.19	6	9	15	1	0	1
4:67158548:A:G	rs112920985	4	67158548	G	A	0.01498	NA	NA	NA	0.220145	rs67668930	7	MIR1269A	15901	intergenic	0.982	6	9	15	1	0	1
4:67158566:A:G	rs73241149	4	67158566	A	G	0.02476	NA	NA	NA	0.321243	rs67668930	7	MIR1269A	15919	intergenic	0.023	7	9	15	1	0	1
4:67158646:C:T	rs73241150	4	67158646	C	T	0.01498	NA	NA	NA	0.220145	rs67668930	7	MIR1269A	15999	intergenic	1.153	6	9	15	1	0	1
4:67159224:G:T	rs73241152	4	67159224	T	G	0.01498	NA	NA	NA	0.220145	rs67668930	7	MIR1269A	16577	intergenic	5.745	7	7	15	1	0	1
4:67160205:G:GGT	rs142796174	4	67160205	GGT	G	0.01637	NA	NA	NA	0.234066	rs67668930	7	MIR1269A	17558	intergenic	1.433	NA	7	15	1	0	1
4:67160747:C:CA	rs146351041	4	67160747	CA	C	0.01138	NA	NA	NA	0.162893	rs67668930	7	MIR1269A	18100	intergenic	1.193	NA	7	15	1	0	1
4:67162046:A:G	rs112544247	4	67162046	G	A	0.01577	NA	NA	NA	0.228136	rs67668930	7	MIR1269A	19399	intergenic	0.032	6	9	15	1	0	1
4:67162076:A:ATTAAT	rs144970954	4	67162076	A	ATTAAT	0.01577	NA	NA	NA	0.228136	rs67668930	7	MIR1269A	19429	intergenic	3.208	NA	9	15	1	0	1
4:67162261:T:TAAAAA	rs561940573	4	67162261	T	TAAAAA	0.05351	NA	NA	NA	0.69642	rs67668930	7	MIR1269A	19614	intergenic	NA	NA	9	15	1	0	1
4:67162392:A:G	rs73241154	4	67162392	G	A	0.01677	NA	NA	NA	0.238198	rs67668930	7	MIR1269A	19745	intergenic	1.261	7	9	15	1	0	1
4:67162754:A:G	rs73241155	4	67162754	A	G	0.01677	NA	NA	NA	0.238198	rs67668930	7	MIR1269A	20107	intergenic	2.253	6	14	15	1	0	1
4:67163250:A:G	rs116313261	4	67163250	G	A	0.01577	NA	NA	NA	0.228136	rs67668930	7	MIR1269A	20603	intergenic	0.169	6	14	15	1	0	1
4:67163576:C:G	rs60607075	4	67163576	G	C	0.01577	NA	NA	NA	0.228136	rs67668930	7	MIR1269A	20929	intergenic	14.75	5	14	15	1	0	1
4:67165211:A:G	rs73241156	4	67165211	G	A	0.01577	NA	NA	NA	0.228136	rs67668930	7	MIR1269A	22564	intergenic	1.178	6	14	15	1	0	1
4:67165503:A:G	rs73241157	4	67165503	A	G	0.01677	NA	NA	NA	0.238198	rs67668930	7	MIR1269A	22856	intergenic	0.146	6	14	15	1	0	1
4:67165653:A:G	rs73241159	4	67165653	A	G	0.01677	NA	NA	NA	0.238198	rs67668930	7	MIR1269A	23006	intergenic	1.339	6	15	15	1	0	1
4:67165829:A:G	rs73241160	4	67165829	A	G	0.01677	NA	NA	NA	0.238198	rs67668930	7	MIR1269A	23182	intergenic	0.318	6	15	15	1	0	1
4:67166737:A:G	rs73241162	4	67166737	A	G	0.01677	NA	NA	NA	0.238198	rs67668930	7	MIR1269A	24090	intergenic	0.745	7	15	15	1	0	1
4:67166752:G:T	rs73241164	4	67166752	T	G	0.01677	NA	NA	NA	0.238198	rs67668930	7	MIR1269A	24105	intergenic	0.902	6	15	15	1	0	1
4:67167326:A:AT	rs34553371	4	67167326	A	AT	0.406	NA	NA	NA	0.181503	rs67668930	7	MIR1269A	24679	intergenic	0.521	NA	15	15	1	0	1
4:67167330:A:G	rs34201442	4	67167330	G	A	0.3241	NA	NA	NA	0.134373	rs67668930	7	MIR1269A	24683	intergenic	0.039	6	15	15	1	0	1
4:67167546:C:T	rs73241165	4	67167546	C	T	0.01577	NA	NA	NA	0.228136	rs67668930	7	MIR1269A	24899	intergenic	0.882	7	15	15	1	0	1
4:67168663:G:T	rs113822617	4	67168663	T	G	0.01558	NA	NA	NA	0.226134	rs67668930	7	MIR1269A	26016	intergenic	4.976	6	9	15	1	0	1
4:67168684:C:T	rs73241168	4	67168684	T	C	0.01657	NA	NA	NA	0.236179	rs67668930	7	MIR1269A	26037	intergenic	1.032	6	9	15	1	0	1
4:67168803:G:GT	rs11398731	4	67168803	G	GT	0.3662	NA	NA	NA	0.187801	rs67668930	7	MIR1269A	26156	intergenic	1.142	NA	9	15	1	0	1
4:67169030:A:G	rs73241170	4	67169030	G	A	0.01577	NA	NA	NA	0.228136	rs67668930	7	MIR1269A	26383	intergenic	0.913	7	9	15	1	0	1
4:67169319:G:T	rs73241171	4	67169319	T	G	0.01677	NA	NA	NA	0.238198	rs67668930	7	MIR1269A	26672	intergenic	1.79	6	9	15	1	0	1
4:67170739:C:CT	rs140557218	4	67170739	CT	C	0.01577	NA	NA	NA	0.228136	rs67668930	7	MIR1269A	28092	intergenic	4.874	NA	9	15	1	0	1
4:67170806:A:G	rs73241173	4	67170806	G	A	0.01577	NA	NA	NA	0.228136	rs67668930	7	MIR1269A	28159	intergenic	0.064	5	9	15	1	0	1
4:67172540:G:GT	rs200062015	4	67172540	GT	G	0.01577	NA	NA	NA	0.228136	rs67668930	7	MIR1269A	29893	intergenic	1.022	NA	9	15	1	0	1
4:67172542:A:C	rs568125868	4	67172542	A	C	0.01577	NA	NA	NA	0.228136	rs67668930	7	MIR1269A	29895	intergenic	1.061	NA	9	15	1	0	1
4:67173033:C:T	rs113643599	4	67173033	C	T	0.01977	NA	NA	NA	0.268809	rs67668930	7	MIR1269A	30386	intergenic	1.102	7	9	15	1	0	1
4:67173047:A:G	rs113947672	4	67173047	A	G	0.01977	NA	NA	NA	0.268809	rs67668930	7	MIR1269A	30400	intergenic	1.838	6	9	15	1	0	1
4:67174696:A:G	rs113163640	4	67174696	G	A	0.01677	NA	NA	NA	0.238198	rs67668930	7	MIR1269A	32049	intergenic	2.856	7	9	15	1	0	1
4:67175189:A:AT	rs149646312	4	67175189	AT	A	0.01937	NA	NA	NA	0.254001	rs67668930	7	MIR1269A	32542	intergenic	0.625	NA	9	15	1	0	1
4:67175288:G:GC	rs200497634	4	67175288	G	GC	0.01577	NA	NA	NA	0.228136	rs67668930	7	MIR1269A	32641	intergenic	0.521	NA	9	15	1	0	1
4:67175330:C:T	rs6829911	4	67175330	T	C	0.2931	NA	NA	NA	0.220138	rs67668930	7	MIR1269A	32683	intergenic	1.037	6	9	15	1	0	1
4:67175331:A:G	rs6846975	4	67175331	G	A	0.2909	NA	NA	NA	0.21773	rs67668930	7	MIR1269A	32684	intergenic	0.75	6	9	15	1	0	1
[truncated: 315 more rows]

## Sheet: Suppl Table 4
Supplementary Table S4. Associations between SGA treatment response and PGSs of various neuropsychiatric illnesses.
outcome	Predictor	cov	N	BETA	SE	LCI	UCI	r2	p-value	FDR	B-H p-value
antipsychotics_2ndgen_alda_a	BD_PGC2_EUR_auto	SEX+study+PC1+PC2	517	0.0354	0.127	-0.213	0.284	-0.00181	0.78	0.891429	0.891429
antipsychotics_2ndgen_alda_a	BD_PGC2looMayo_EUR_auto	SEX+study+PC1+PC2	517	0.087	0.123	-0.154	0.328	-0.00098	0.48	0.891429	0.891429
antipsychotics_2ndgen_alda_a	BD_PGC3_EUR_auto	SEX+study+PC1+PC2	517	0.0681	0.125	-0.177	0.313	-0.00138	0.586	0.891429	0.891429
antipsychotics_2ndgen_alda_a	BD_PGC3looMayo_EUR_auto	SEX+study+PC1+PC2	517	0.105	0.122	-0.134	0.345	-0.000507	0.39	0.891429	0.891429
antipsychotics_2ndgen_alda_a	BD_PGC4_EUR_auto	SEX+study+PC1+PC2	517	0.18	0.123	-0.061	0.422	0.00224	0.144	0.891429	0.891429
antipsychotics_2ndgen_alda_a	BD_PGC423andMe_EUR_auto	SEX+study+PC1+PC2	517	0.0174	0.143	-0.263	0.298	-0.00193	0.903	0.9632	0.9632
antipsychotics_2ndgen_alda_a	BD_PGC423andMenoGAINAA_TE_auto	SEX+study+PC1+PC2	517	0.0507	0.13	-0.204	0.306	-0.00166	0.697	0.891429	0.891429
antipsychotics_2ndgen_alda_a	BD_PGC4noGAINAA_TE_auto	SEX+study+PC1+PC2	517	0.141	0.121	-0.0969	0.378	0.000677	0.246	0.891429	0.891429
antipsychotics_2ndgen_alda_a	BDI_PGC3_EUR_auto	SEX+study+PC1+PC2	517	0.129	0.129	-0.124	0.382	4.63e-06	0.317	0.891429	0.891429
antipsychotics_2ndgen_alda_a	BDII_PGC3_EUR_auto	SEX+study+PC1+PC2	517	-0.0439	0.126	-0.29	0.203	-0.00172	0.727	0.891429	0.891429
antipsychotics_2ndgen_alda_a	MDD_Levey2021_EURAFR_auto	SEX+study+PC1+PC2	517	0.0368	0.121	-0.2	0.274	-0.00178	0.761	0.891429	0.891429
antipsychotics_2ndgen_alda_a	MDD_PGC2021_EAS_auto	SEX+study+PC1+PC2	517	0.000679	0.121	-0.237	0.238	-0.00196	0.996	0.996	0.996
antipsychotics_2ndgen_alda_a	MDD_PGC3_EUR_auto	SEX+study+PC1+PC2	517	-0.0686	0.136	-0.335	0.198	-0.00146	0.614	0.891429	0.891429
antipsychotics_2ndgen_alda_a	MDD_PGC3UKB_EUR_auto	SEX+study+PC1+PC2	517	0.0699	0.123	-0.172	0.312	-0.00133	0.571	0.891429	0.891429
antipsychotics_2ndgen_alda_a	SCZ_PGC2_EUR_auto	SEX+study+PC1+PC2	517	-0.218	0.152	-0.515	0.0799	0.00206	0.152	0.891429	0.891429
antipsychotics_2ndgen_alda_a	SCZ_PGC3_EUREAS_auto	SEX+study+PC1+PC2	517	-0.138	0.126	-0.385	0.11	0.000371	0.276	0.891429	0.891429
